# Supplementary material for: The design, synthesis, and biological activity assay of malononitrile oxime ether compounds as effective fungicides
Source: Royal Society of Chemistry journal article supplement (doi:10.1039/d3nj03898j), 2023-01-01
Supplement: d3nj03898j1.pdf [file d3nj03898j1.pdf]

## New Journal of Chemistry

### Supporting information

#### **Design, synthesis, and biological activity assay of malononitrile oxime ethers compounds as effective fungicides**

Simin Wang,<sup>a</sup> Zhixiang Zhao,<sup>a</sup> Li Zhang,<sup>a</sup> Jianjun Zhang,<sup>a</sup> Huizhe Lu<sup>a</sup> and Yanhong Dong<sup>\*a</sup>

*a Department of Chemistry and Innovation Center of Pesticide Research, College of Science,  
China Agricultural University, Beijing 100193, China*

## Contents

|                                                                  |    |
|------------------------------------------------------------------|----|
| $^1\text{H}$ NMR spectrum and $^{13}\text{C}$ NMR spectrum ..... | S3 |
|------------------------------------------------------------------|----|

<sup>1</sup>H NMR spectrum and <sup>13</sup>C NMR spectrum

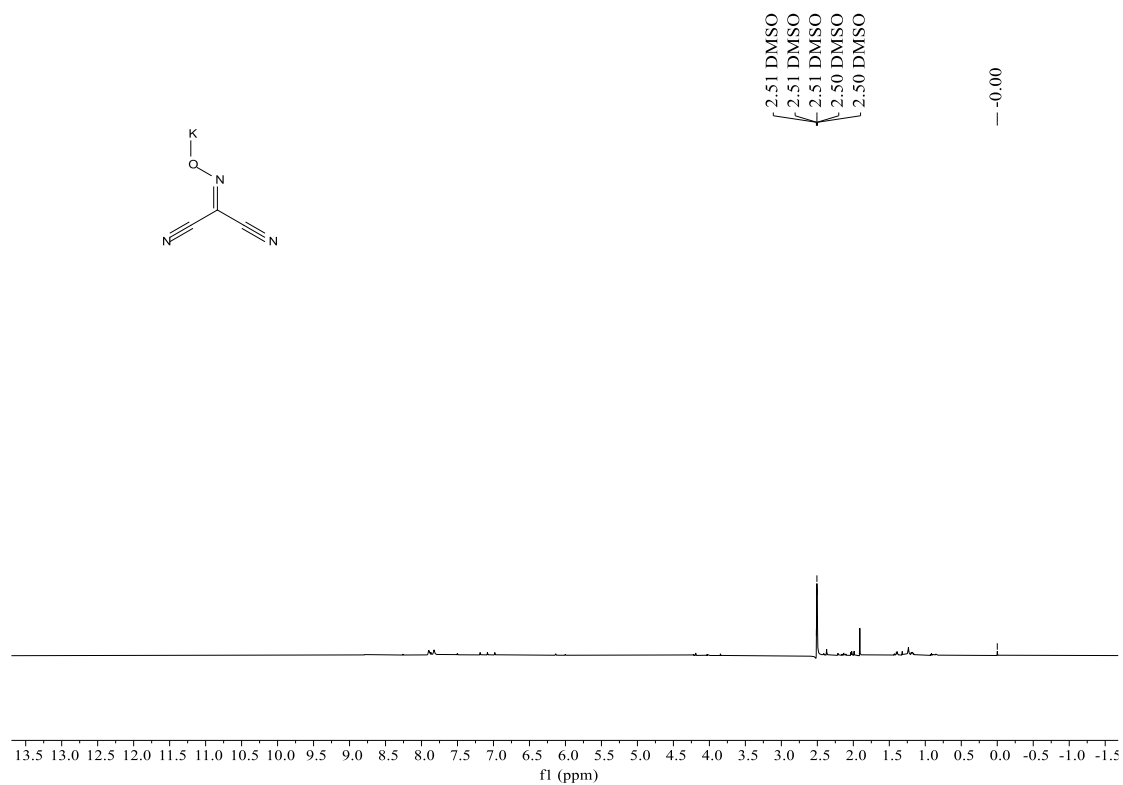

<sup>1</sup>H NMR for compound a

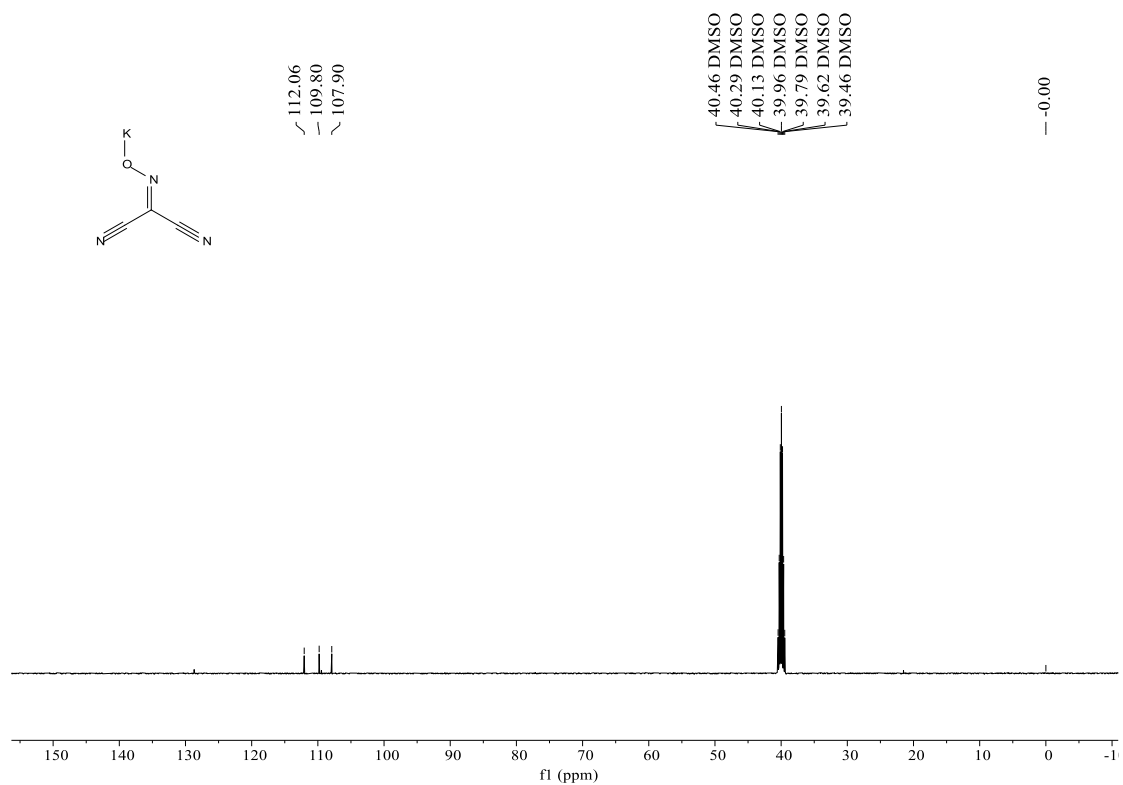

<sup>13</sup>C NMR for compound a

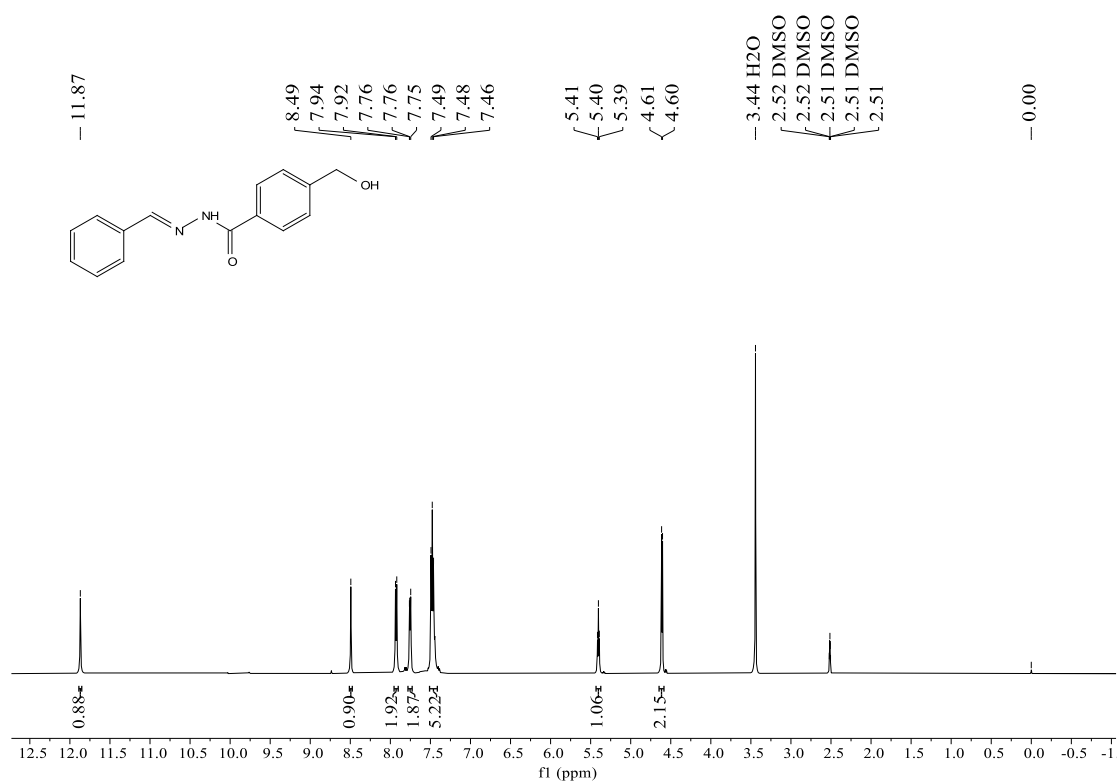

<sup>1</sup>H NMR for compound J1

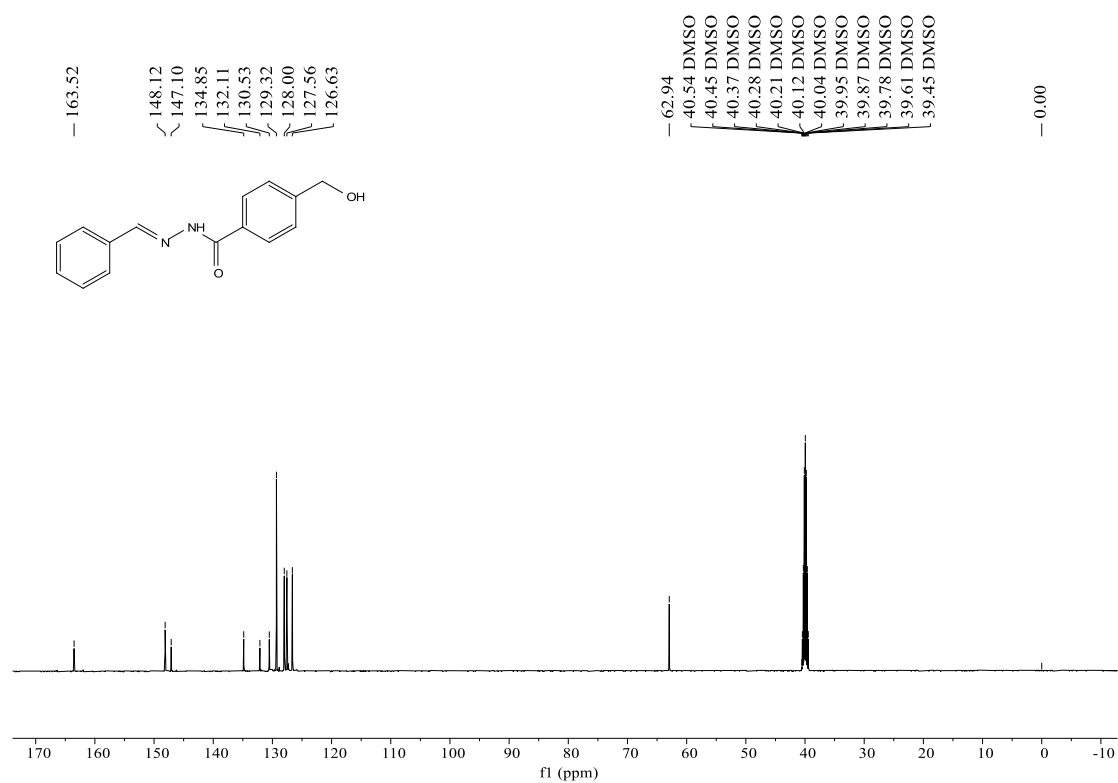

<sup>13</sup>C NMR for compound J1

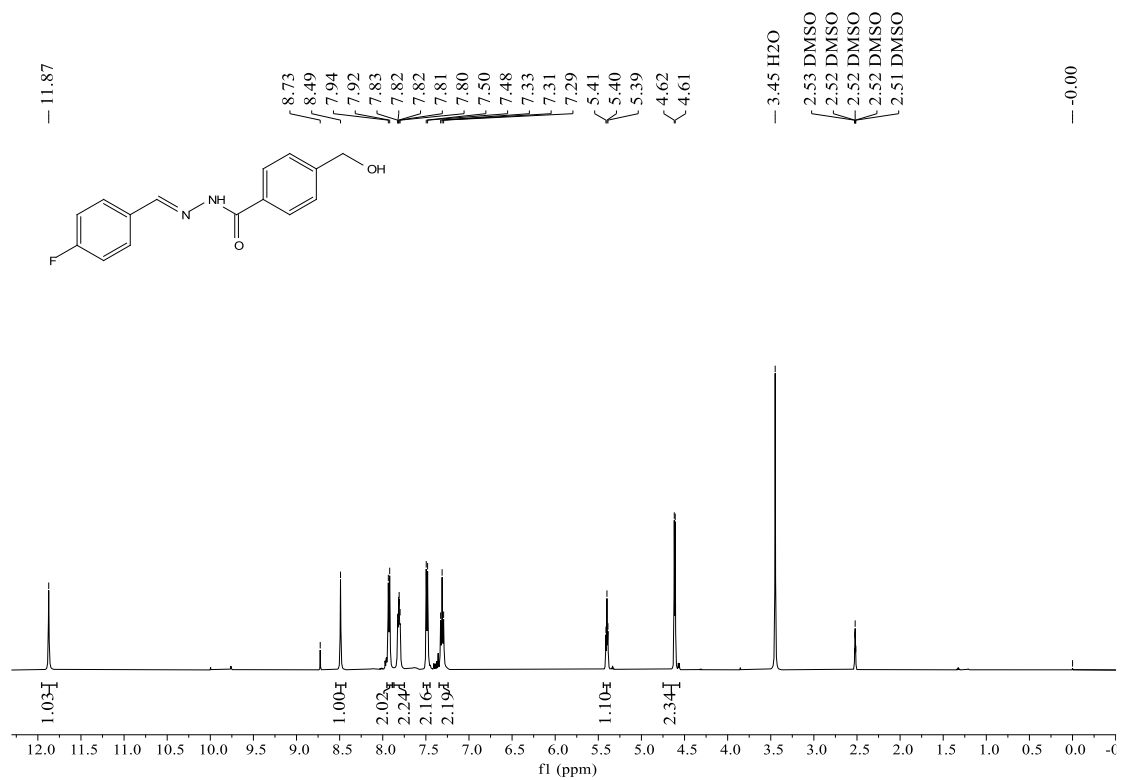

<sup>1</sup>H NMR for compound J2

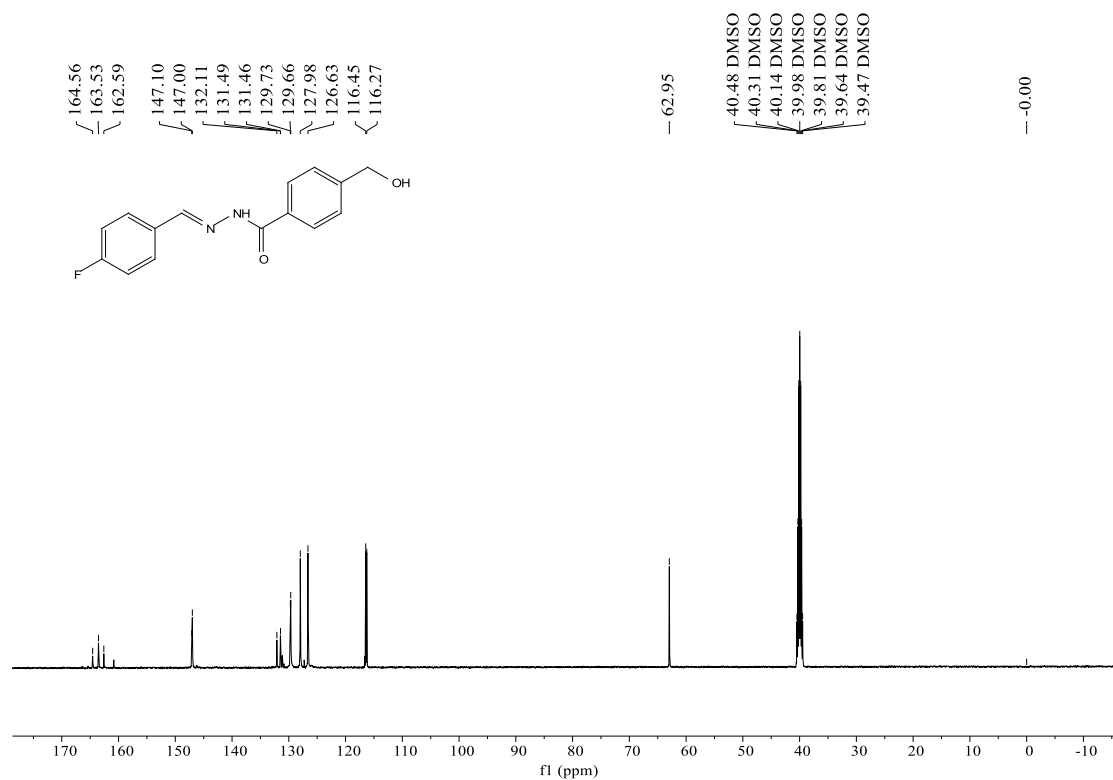

<sup>13</sup>C NMR for compound J2

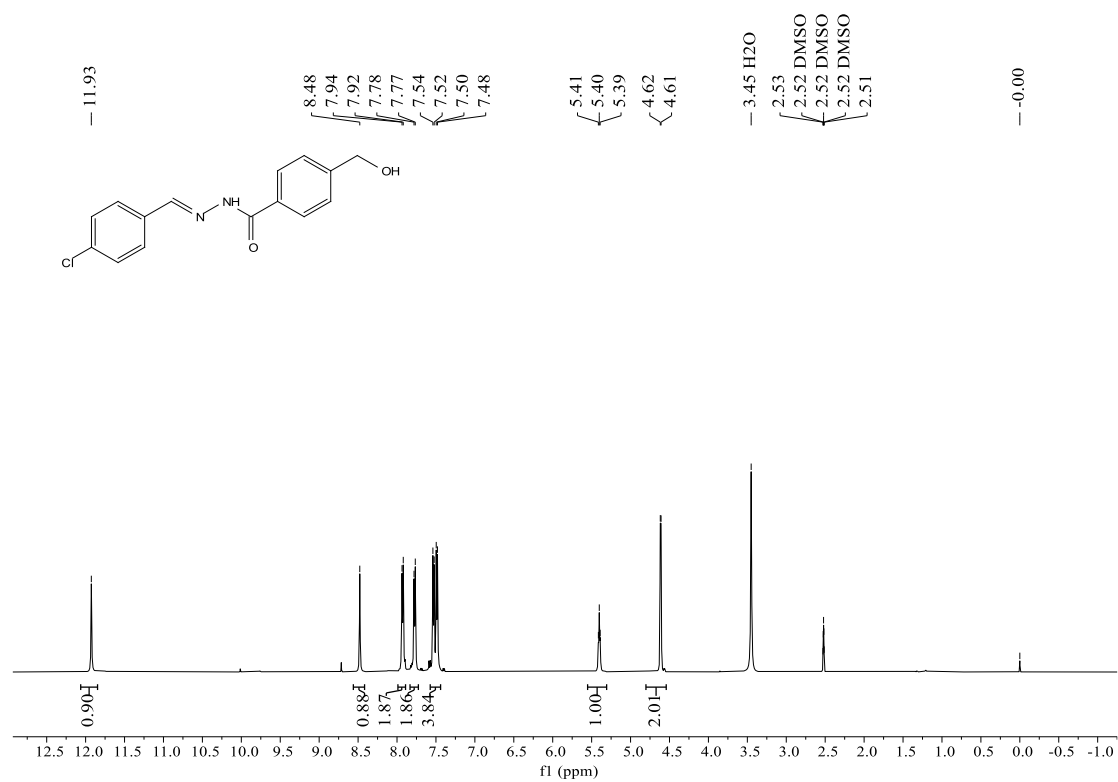

$^1\text{H NMR}$  for compound J3

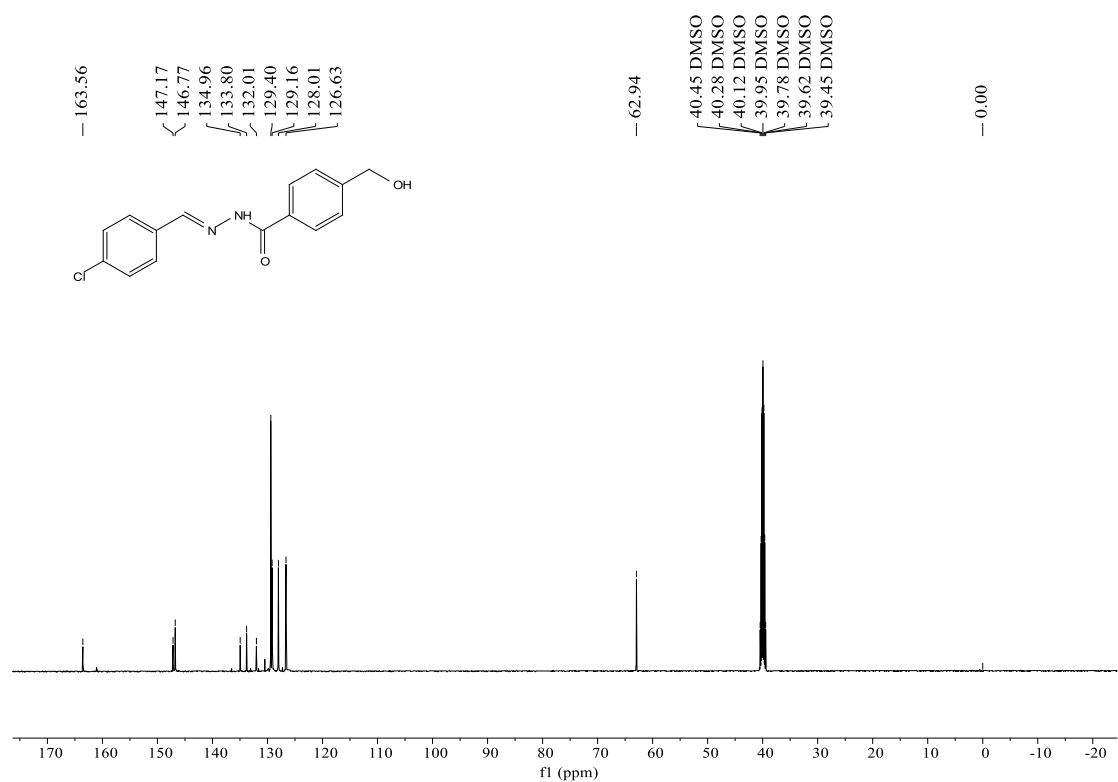

$^{13}\text{C NMR}$  for compound J3

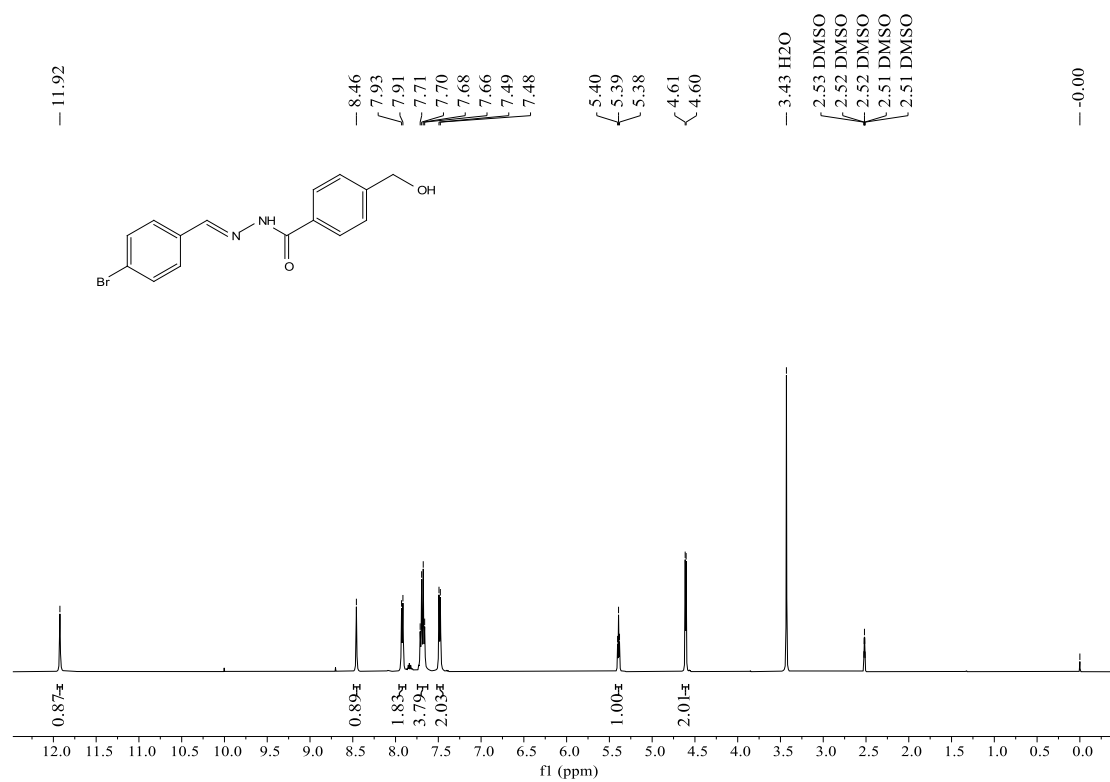

<sup>1</sup>H NMR for compound J4

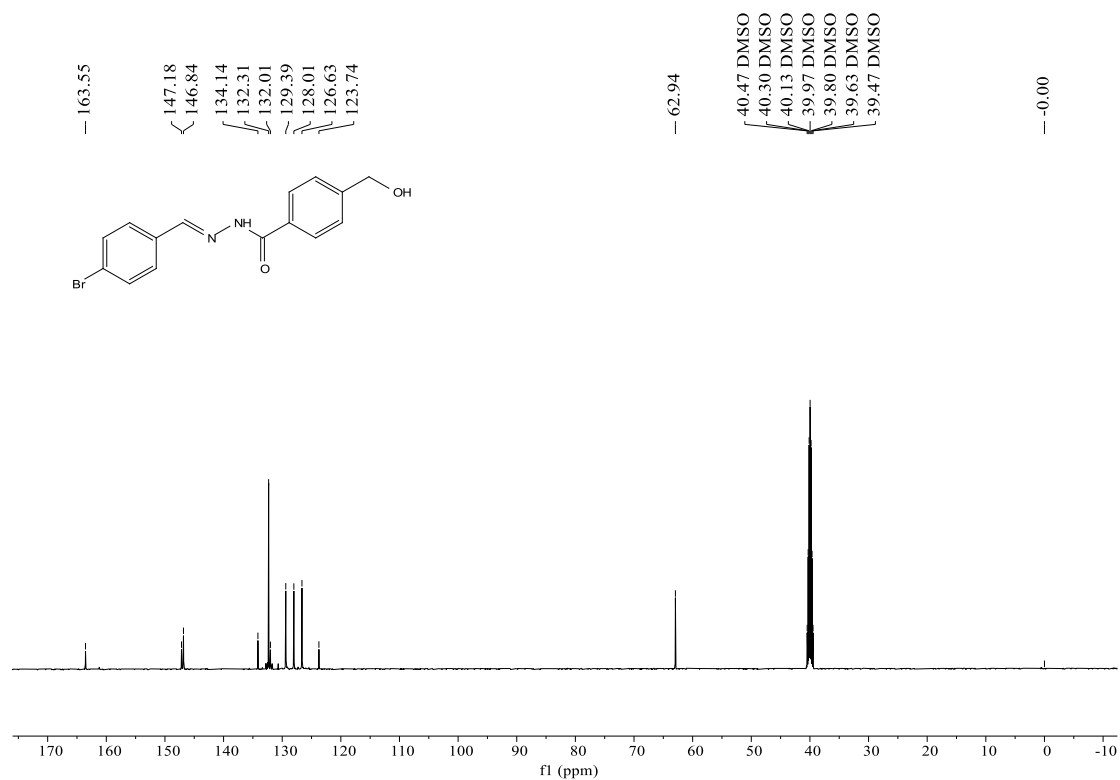

<sup>13</sup>C NMR for compound J4

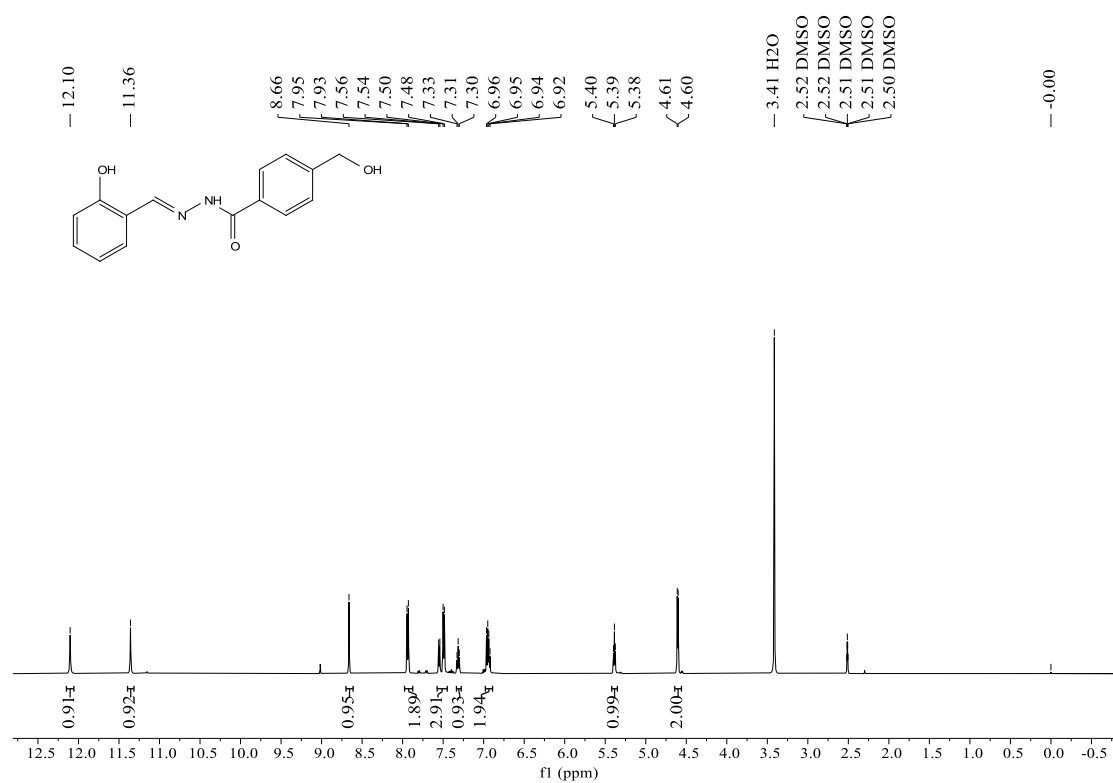

<sup>1</sup>H NMR for compound J5

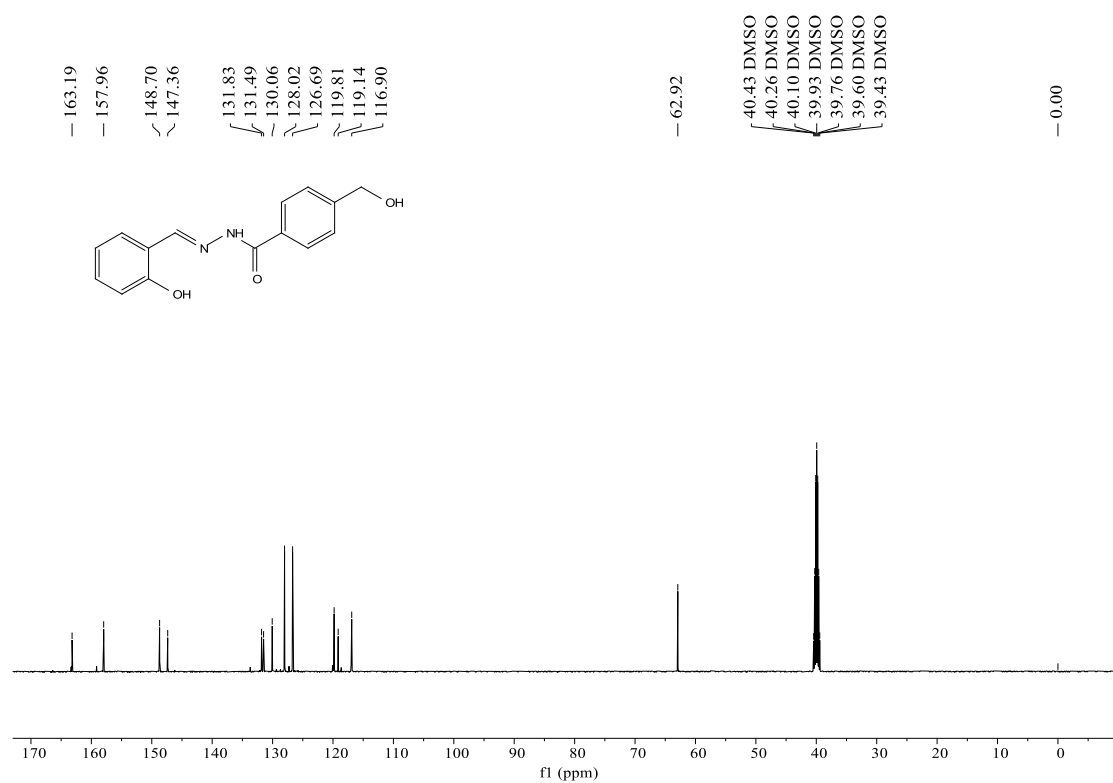

<sup>13</sup>C NMR for compound J5



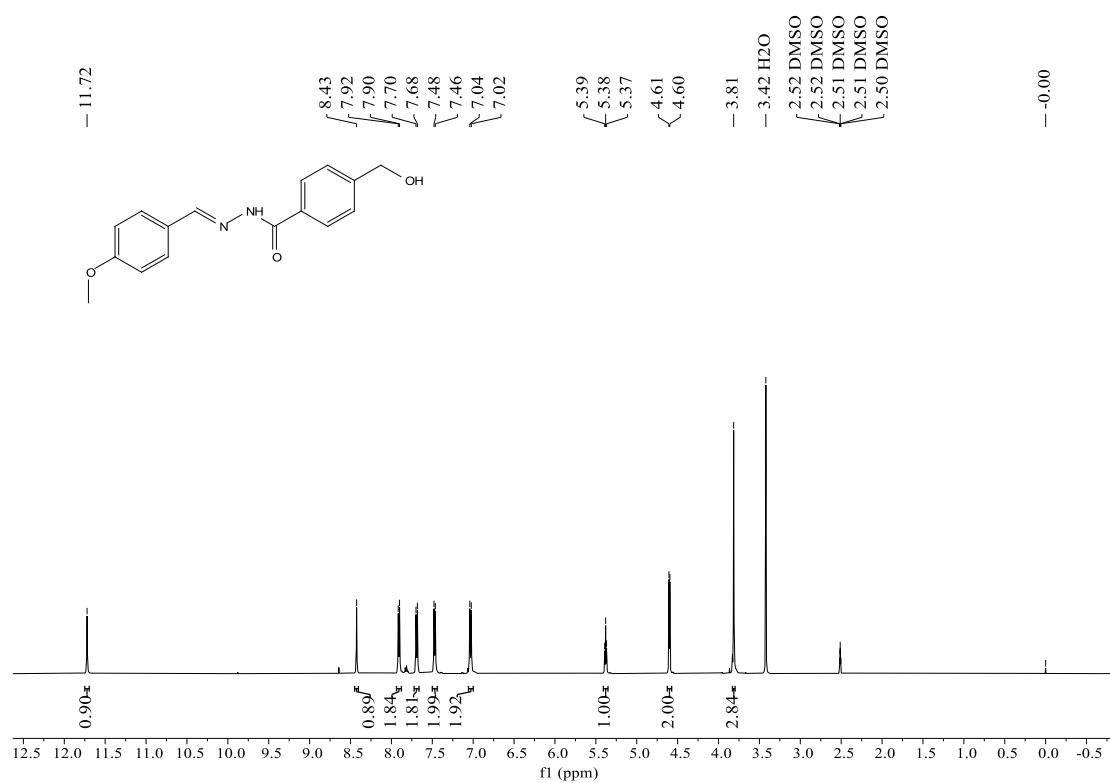

<sup>1</sup>H NMR for compound J6

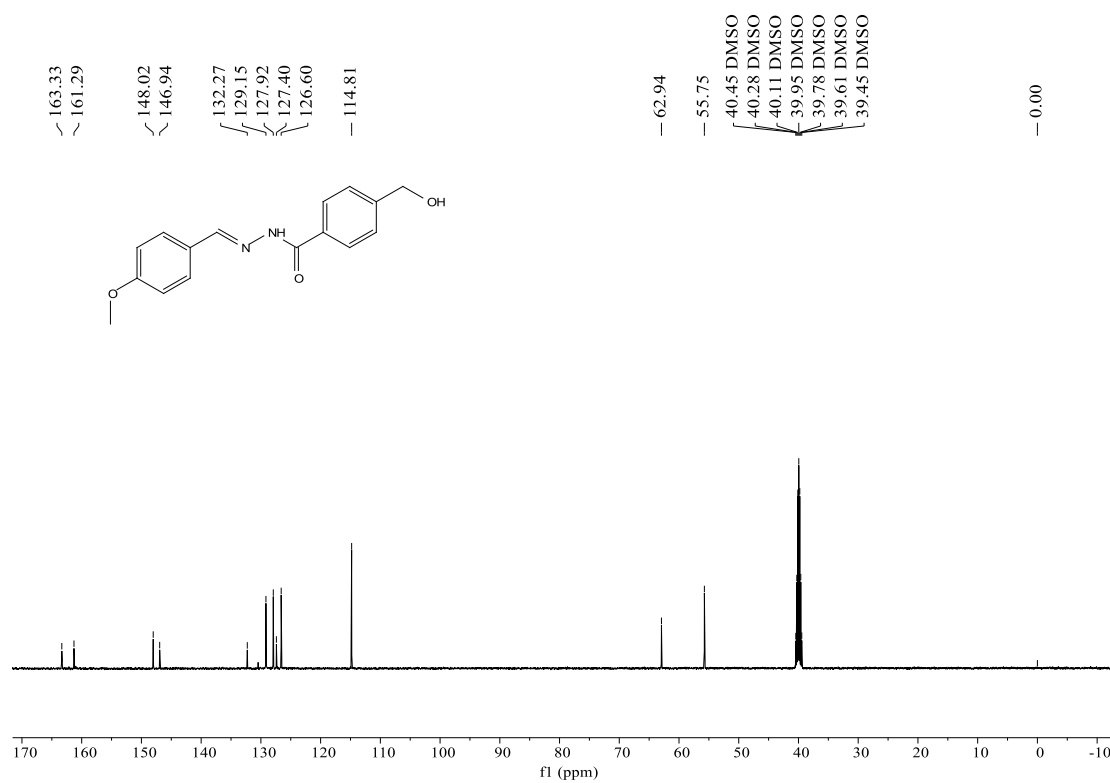

<sup>13</sup>C NMR for compound J6

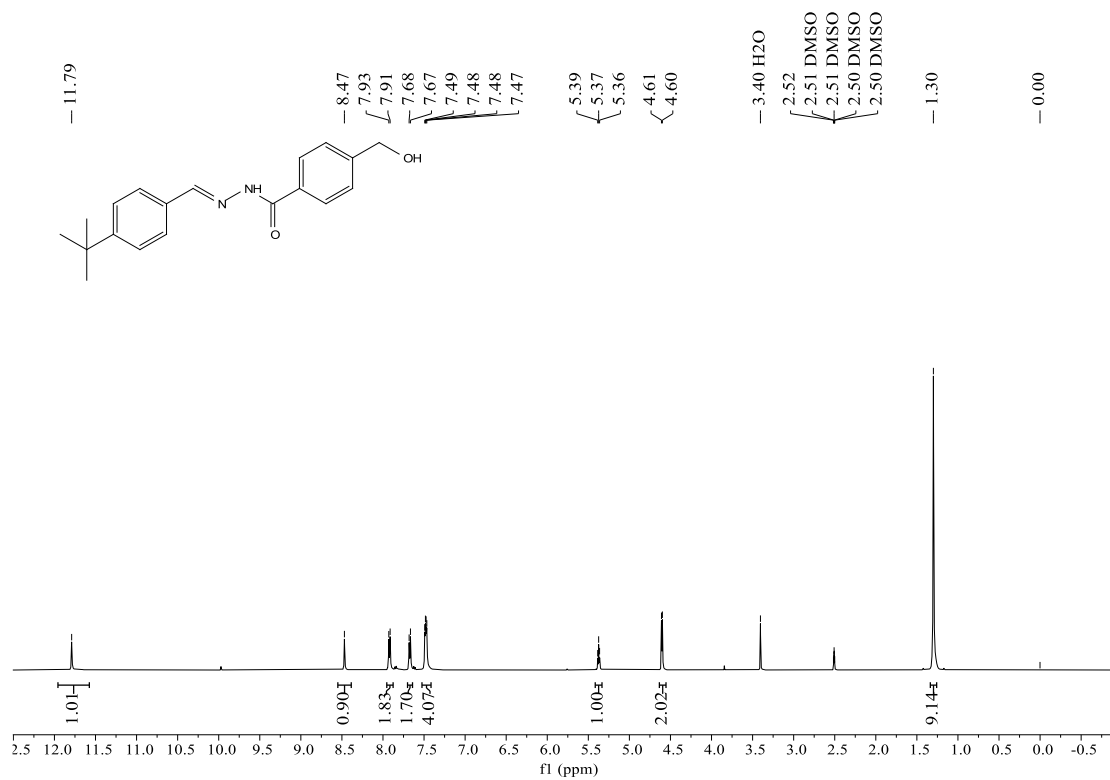

$^1\text{H}$  NMR for compound J7

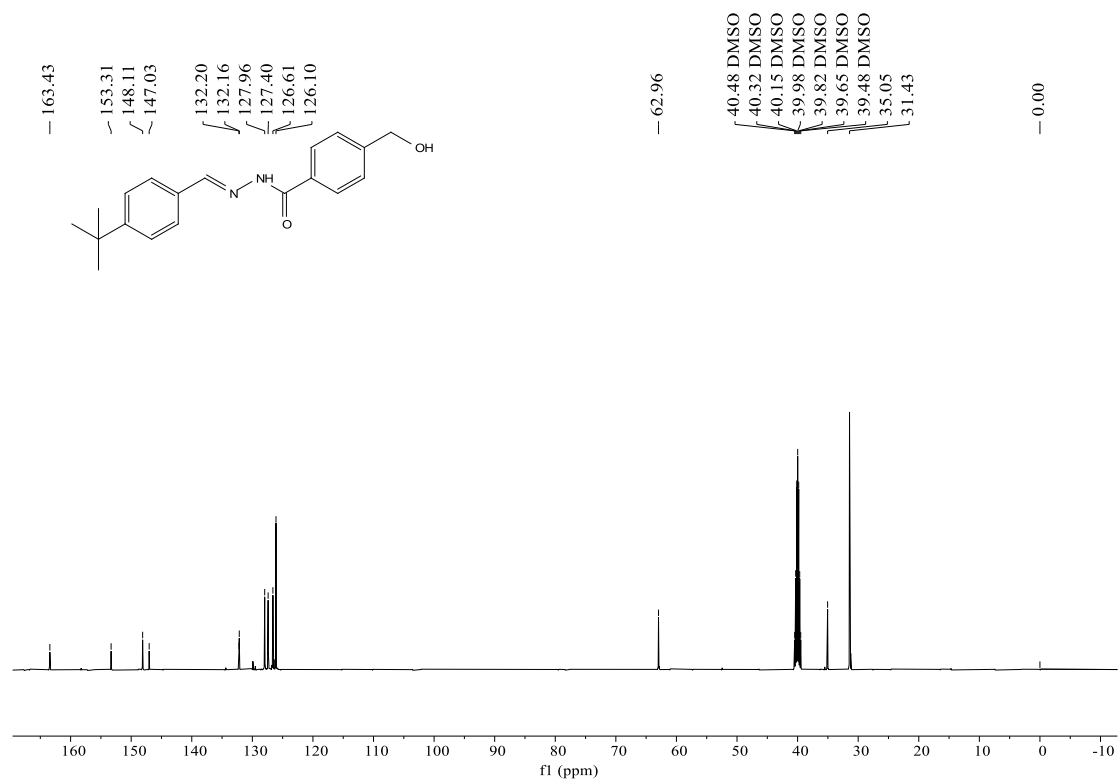

$^{13}\text{C}$  NMR for compound J7

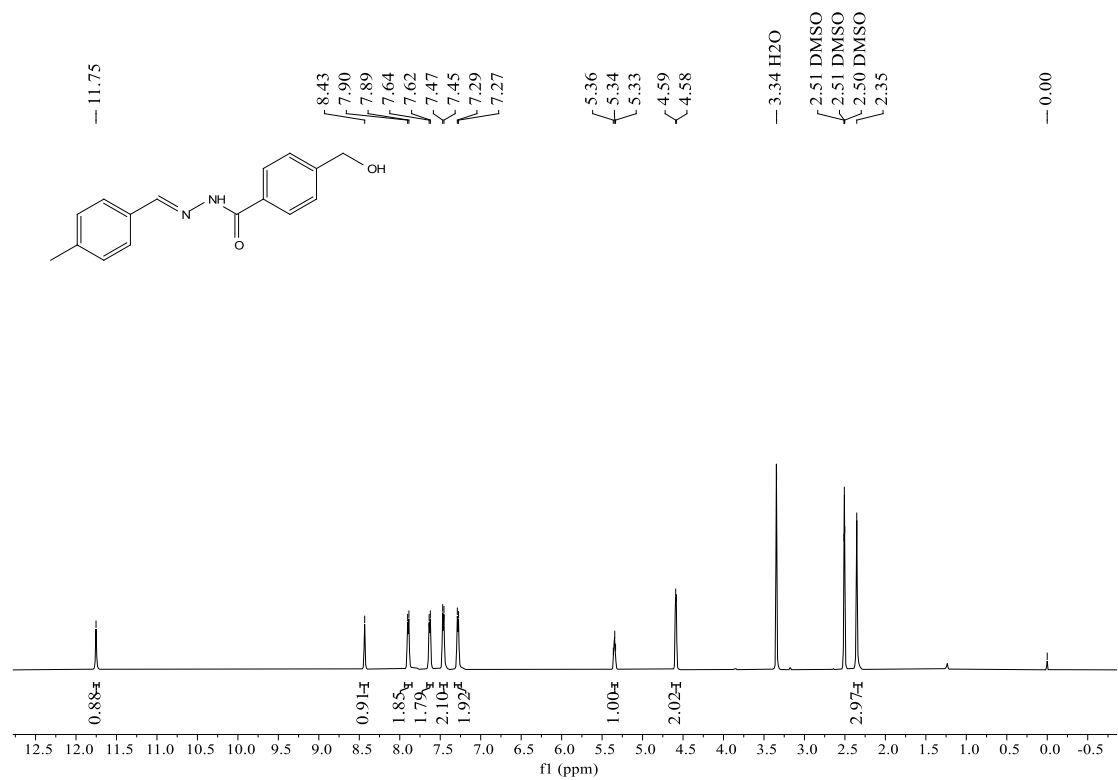

<sup>1</sup>H NMR for compound J8

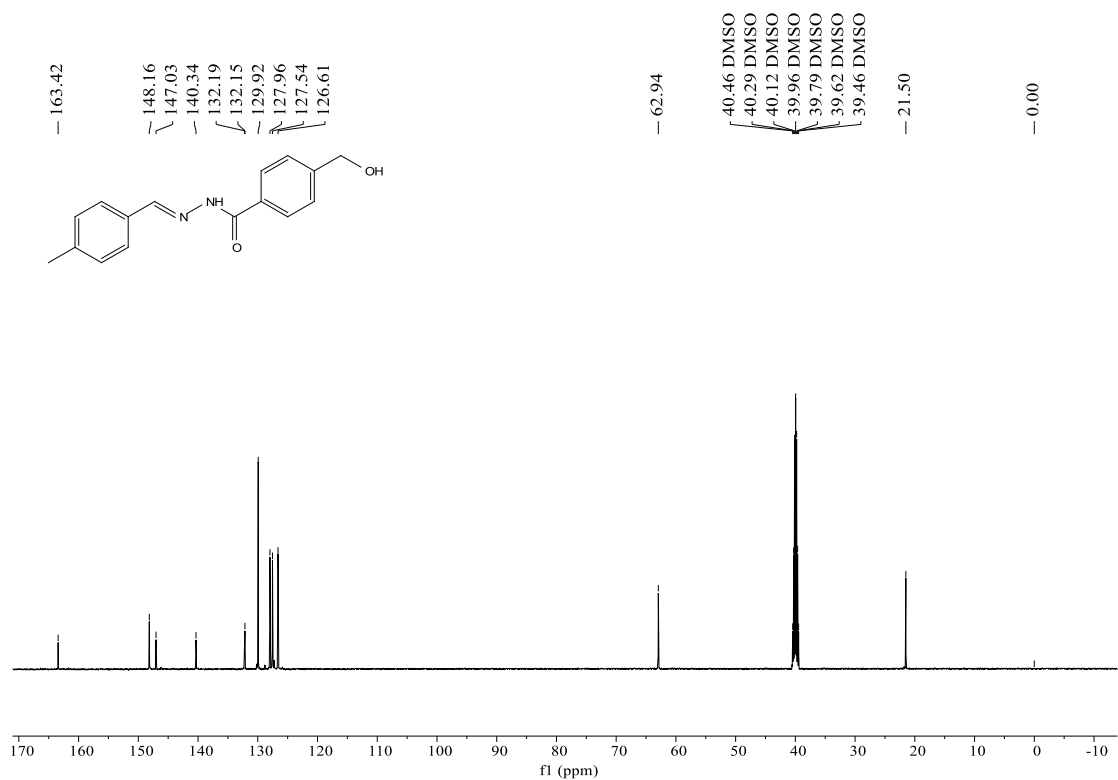

<sup>13</sup>C NMR for compound J8

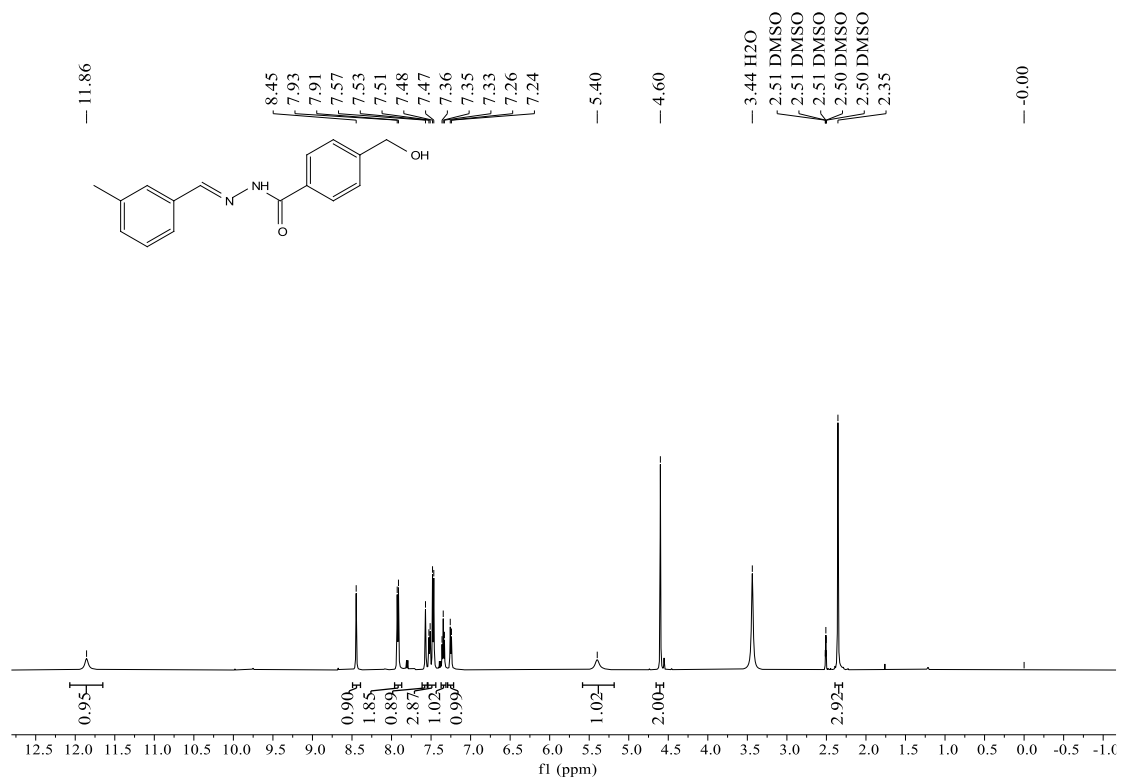

<sup>1</sup>H NMR for compound J9

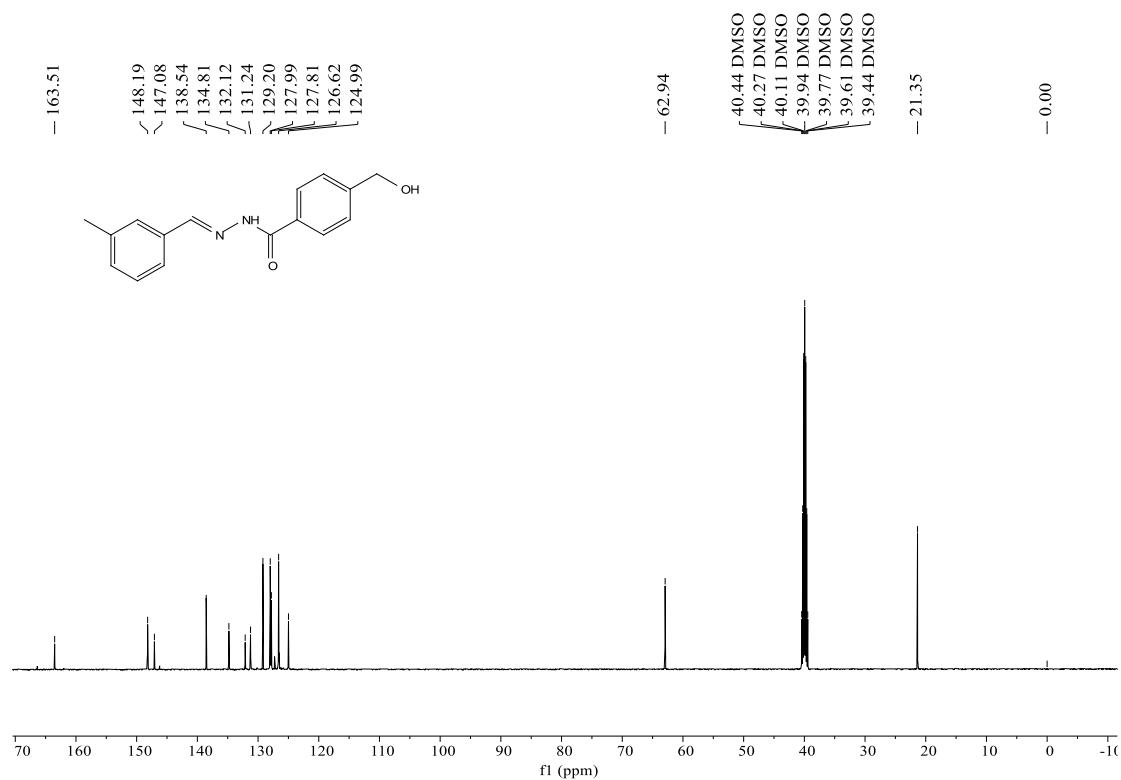

<sup>13</sup>C NMR for compound J9

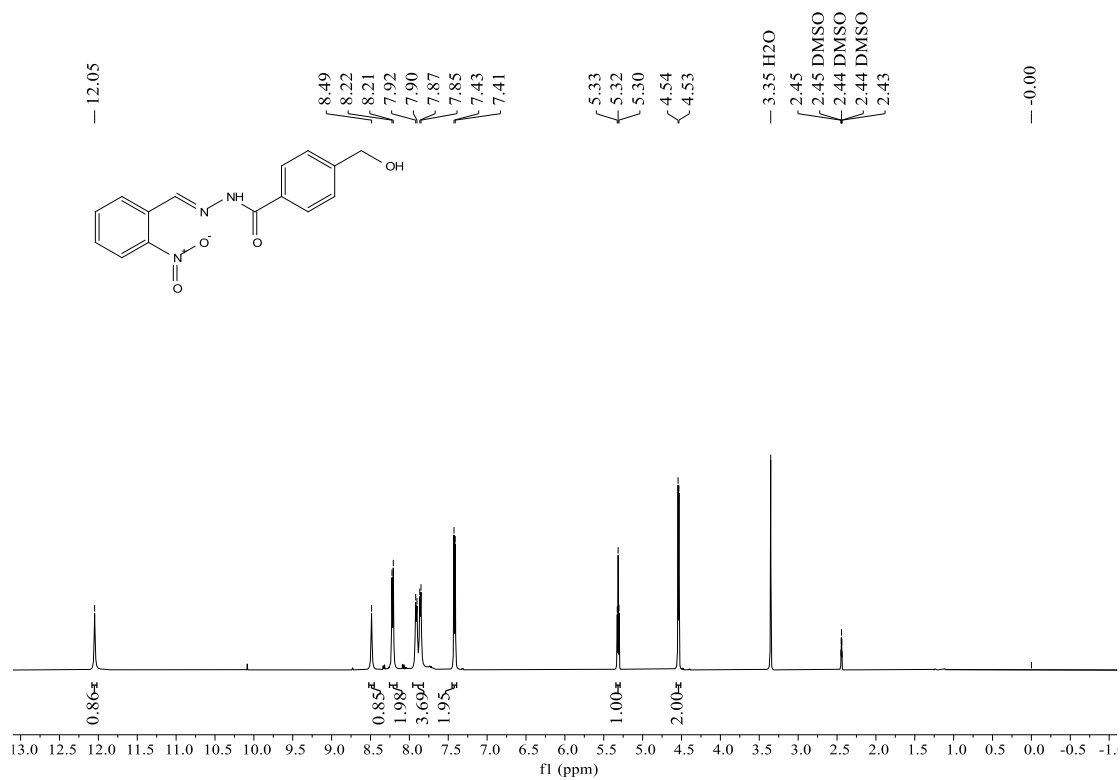

$^1\text{H}$  NMR for compound J10

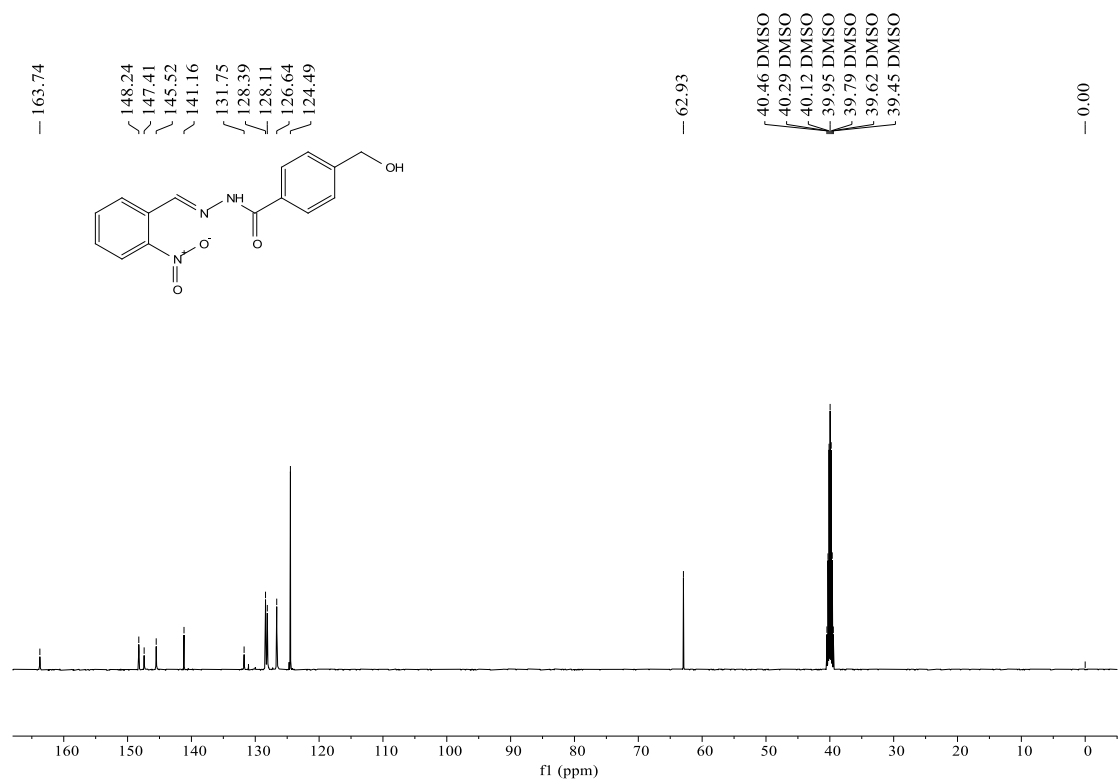

$^{13}\text{C}$  NMR for compound J10

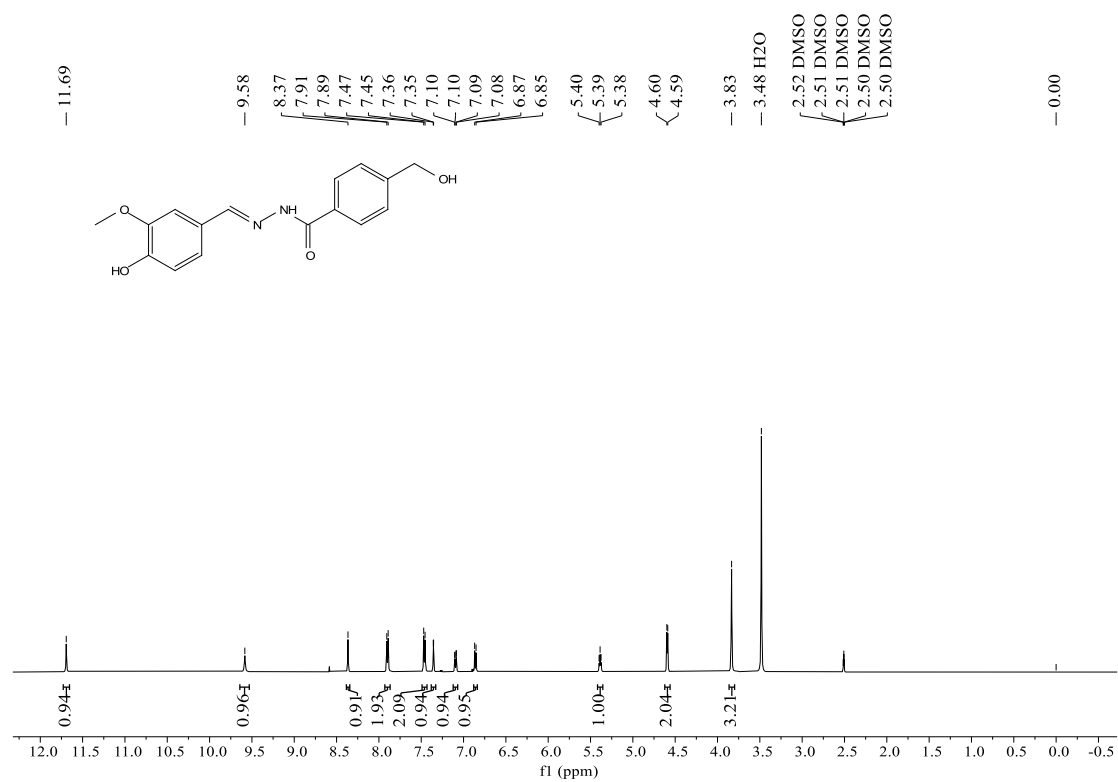

<sup>1</sup>H NMR for compound J11

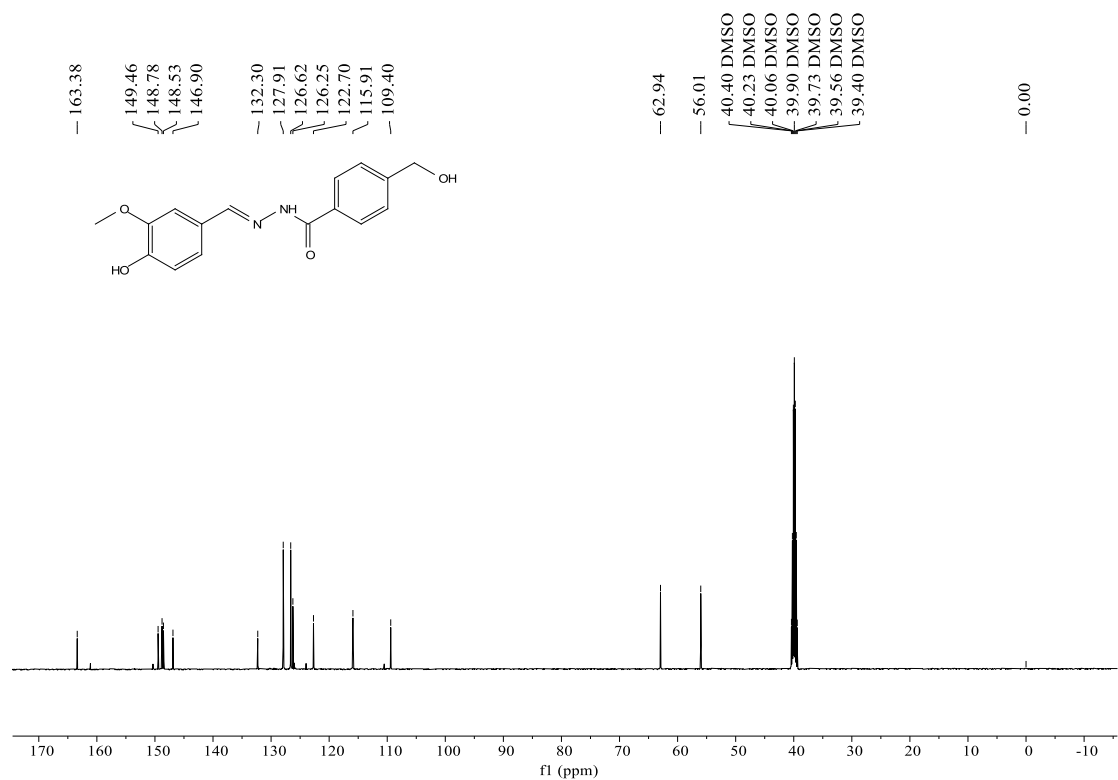

<sup>13</sup>C NMR for compound J11

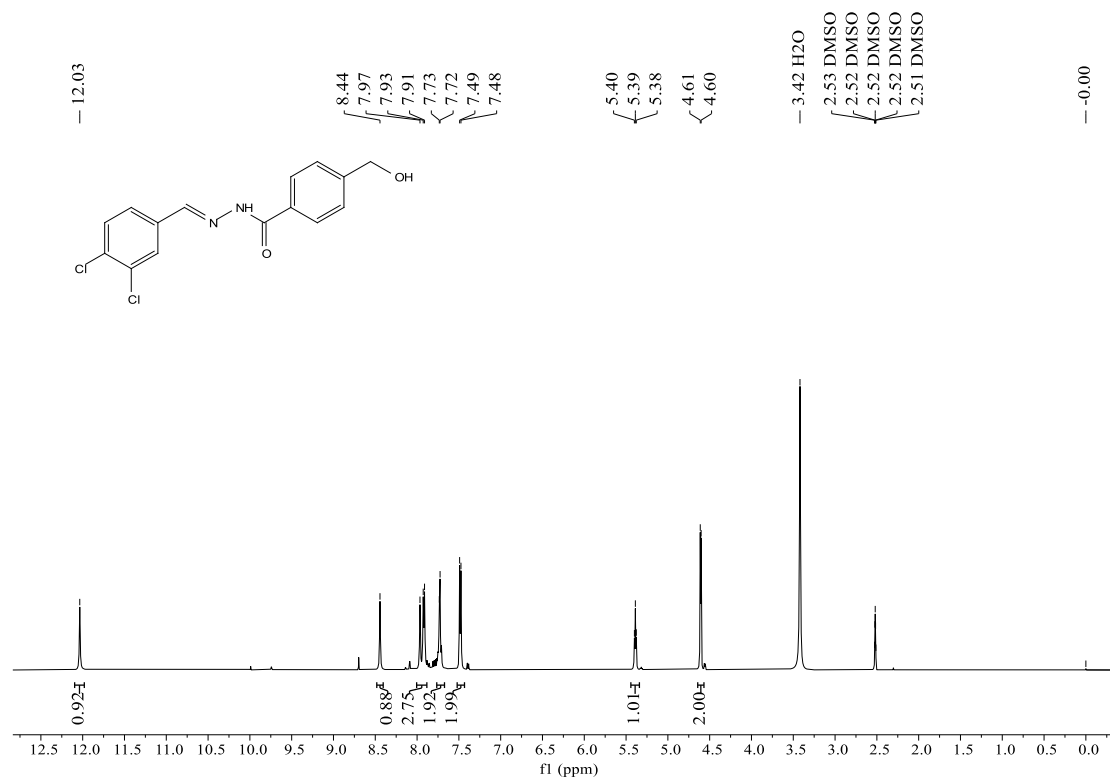

<sup>1</sup>H NMR for compound J12

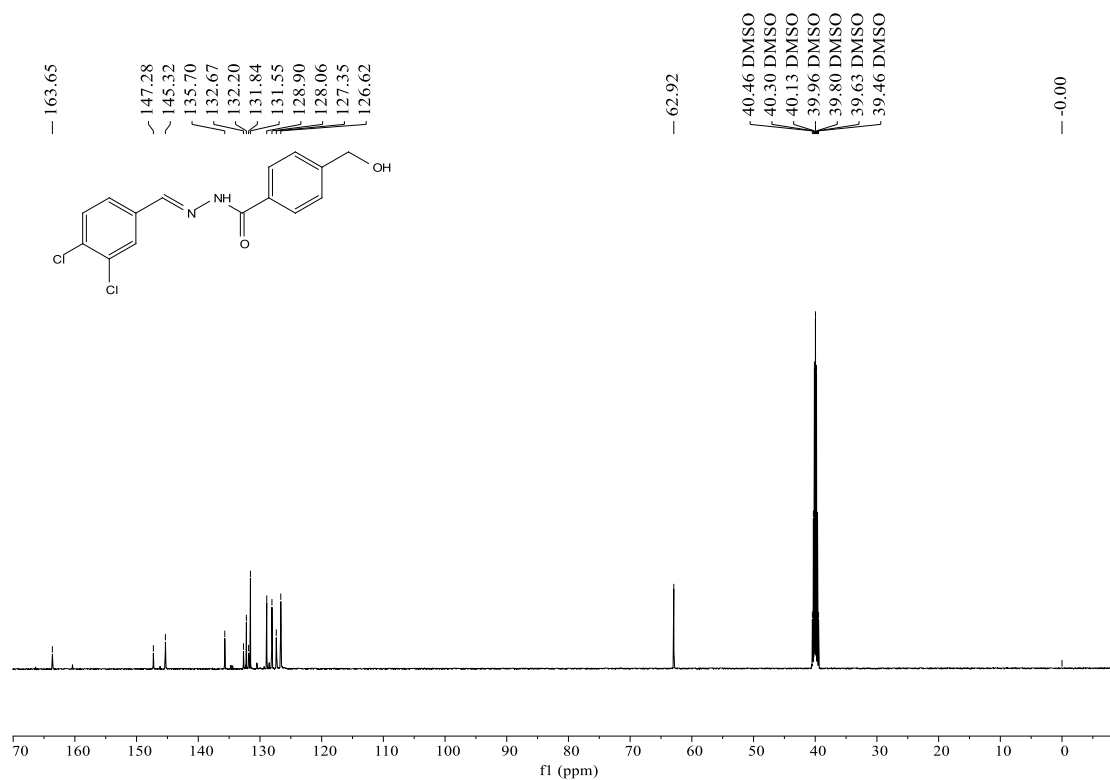

<sup>13</sup>C NMR for compound J12

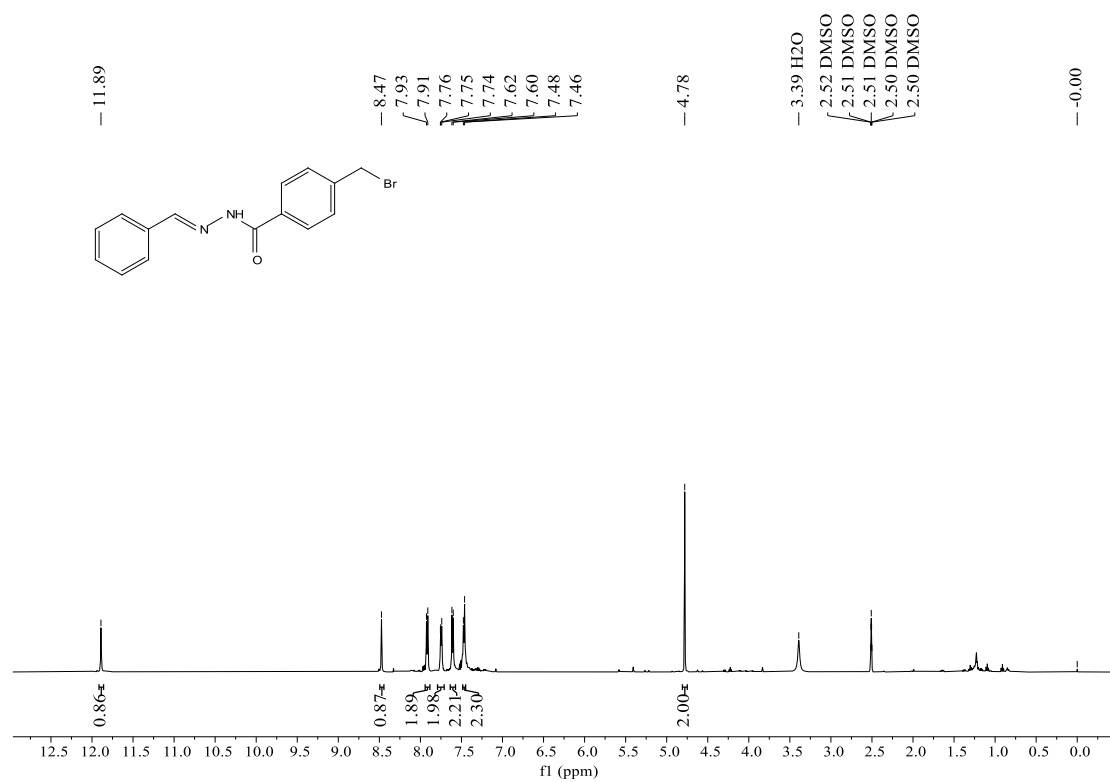

<sup>1</sup>H NMR for compound K1

<sup>13</sup>C NMR (126 MHz, DMSO-d<sub>6</sub>) δ 163.14, 148.42, 142.20, 130.60, 129.82, 129.33, 128.53, 127.59, 33.92.

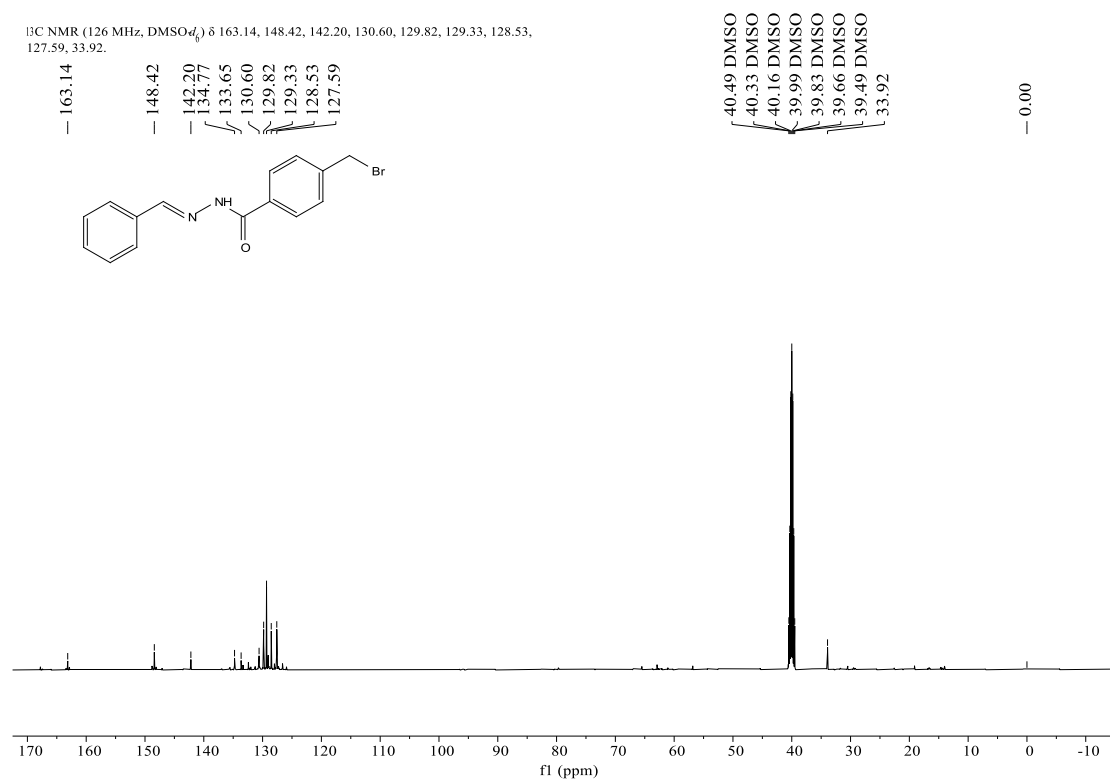

<sup>13</sup>C NMR for compound K1



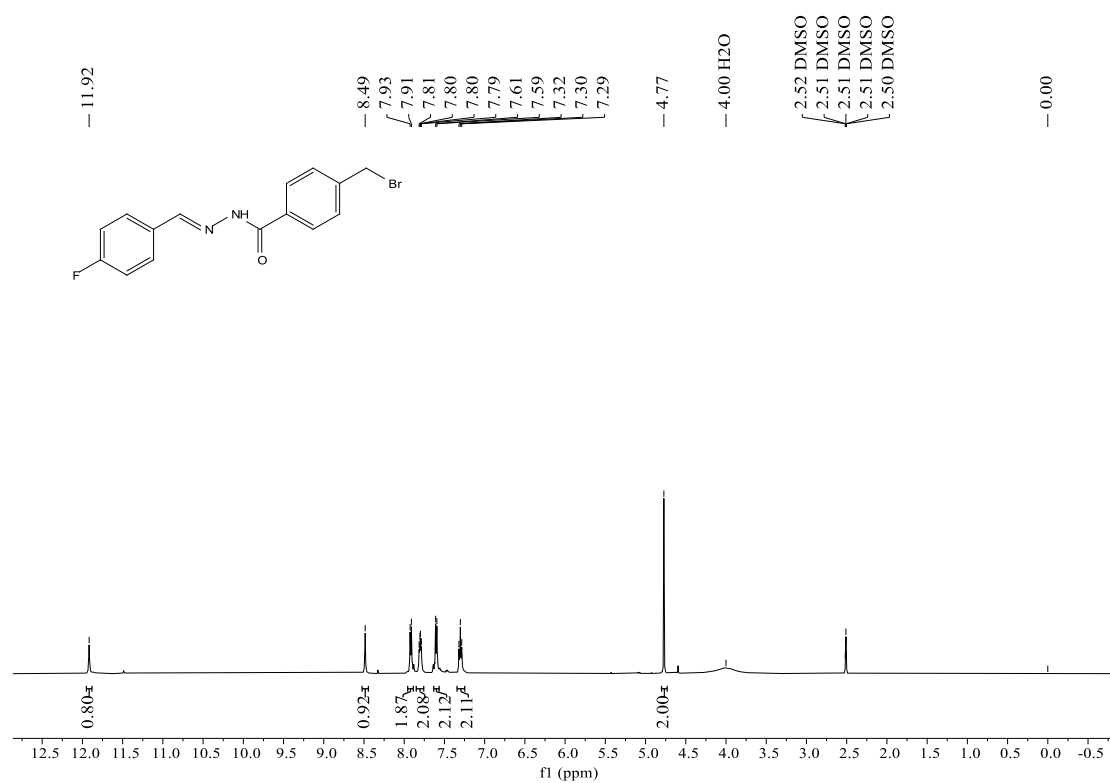

<sup>1</sup>H NMR for compound K2

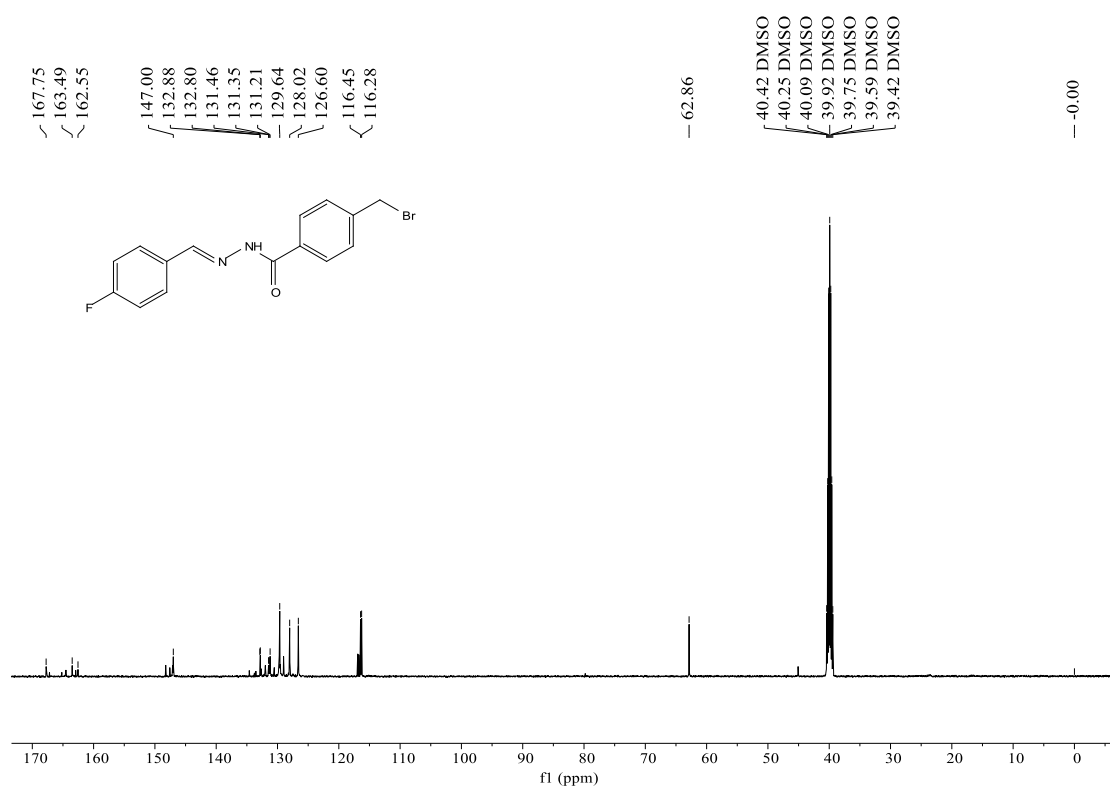

<sup>13</sup>C NMR for compound K2

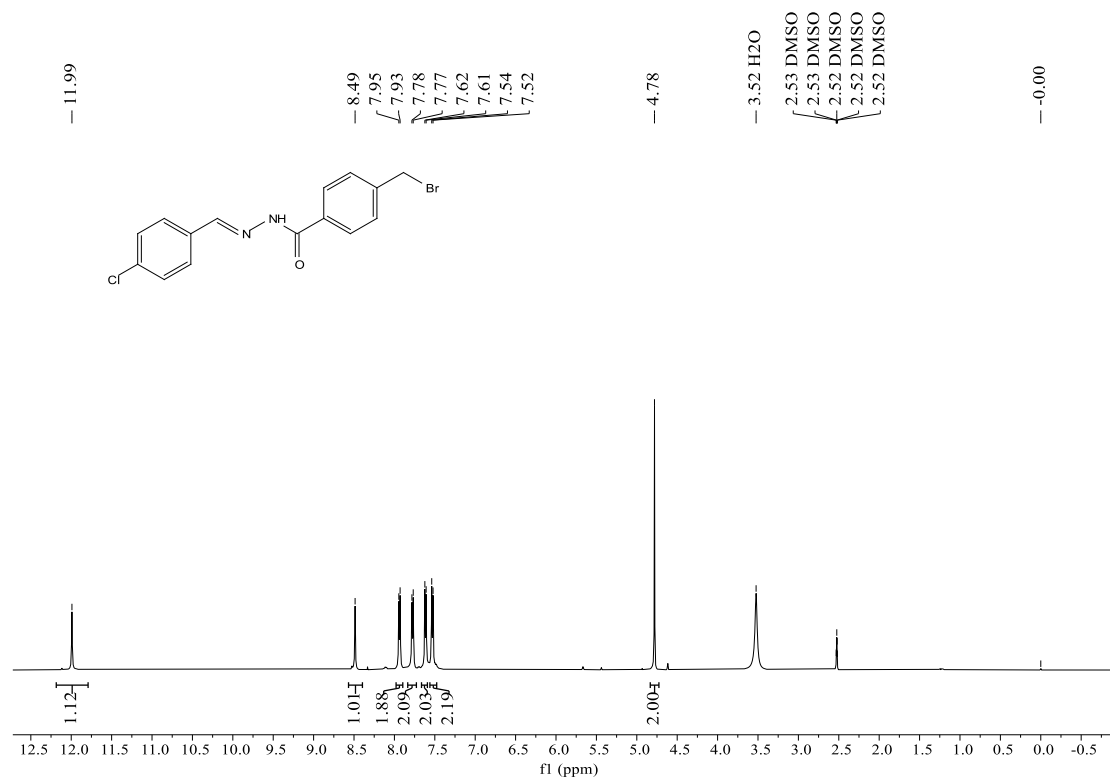

<sup>1</sup>H NMR for compound K3

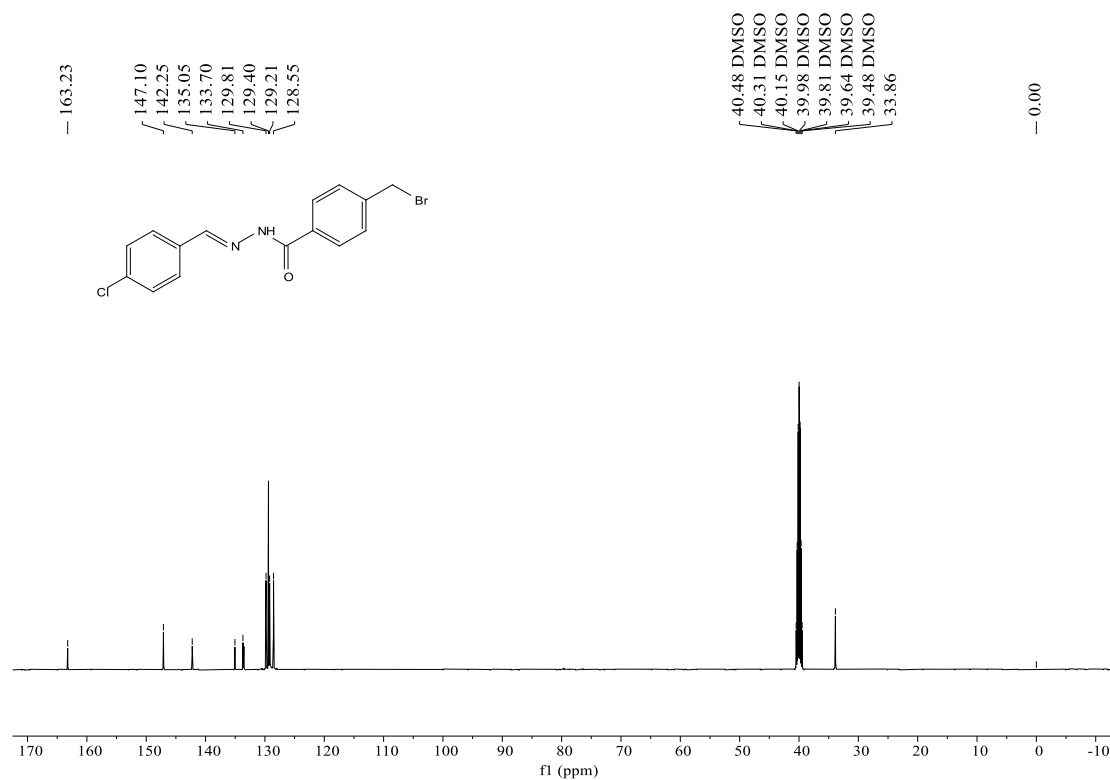

<sup>13</sup>C NMR for compound K3

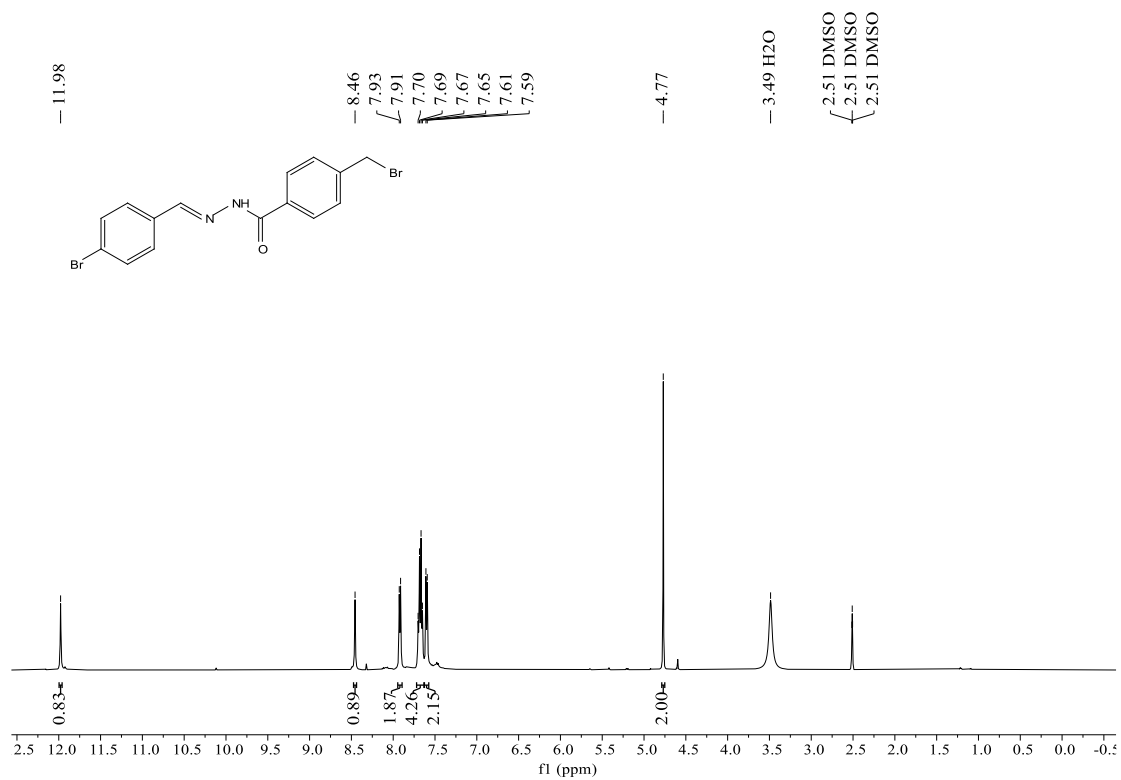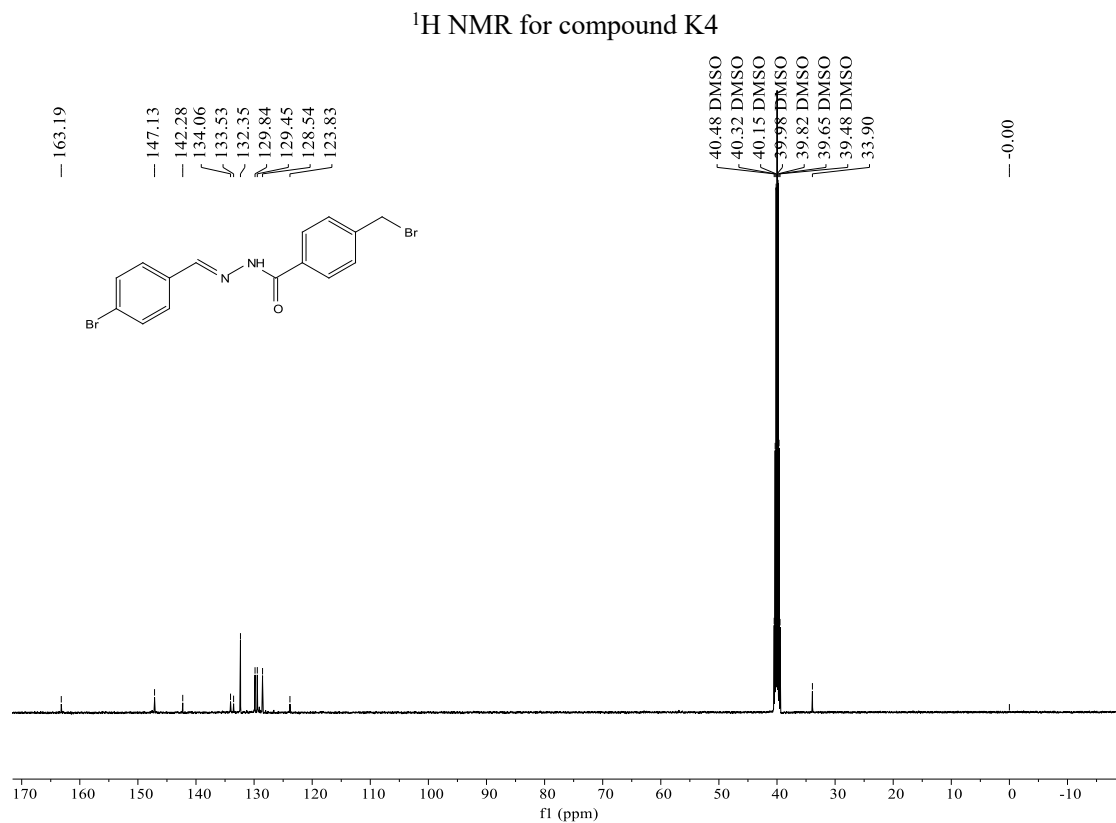

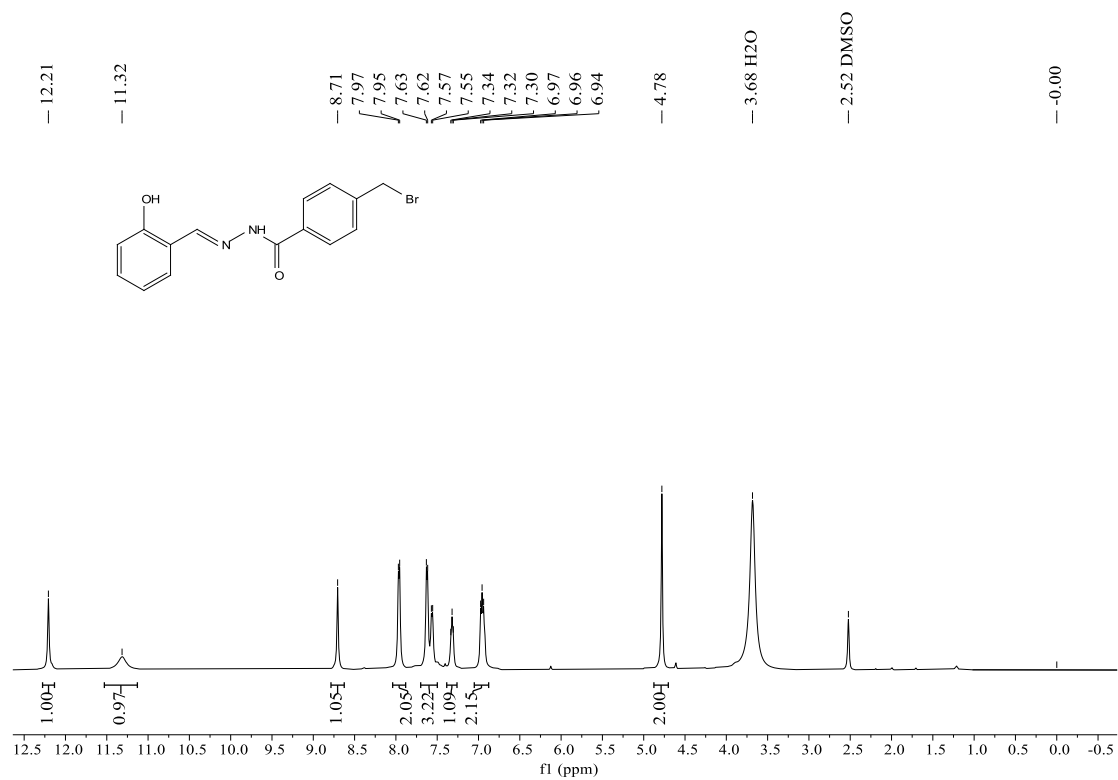

<sup>1</sup>H NMR for compound K5

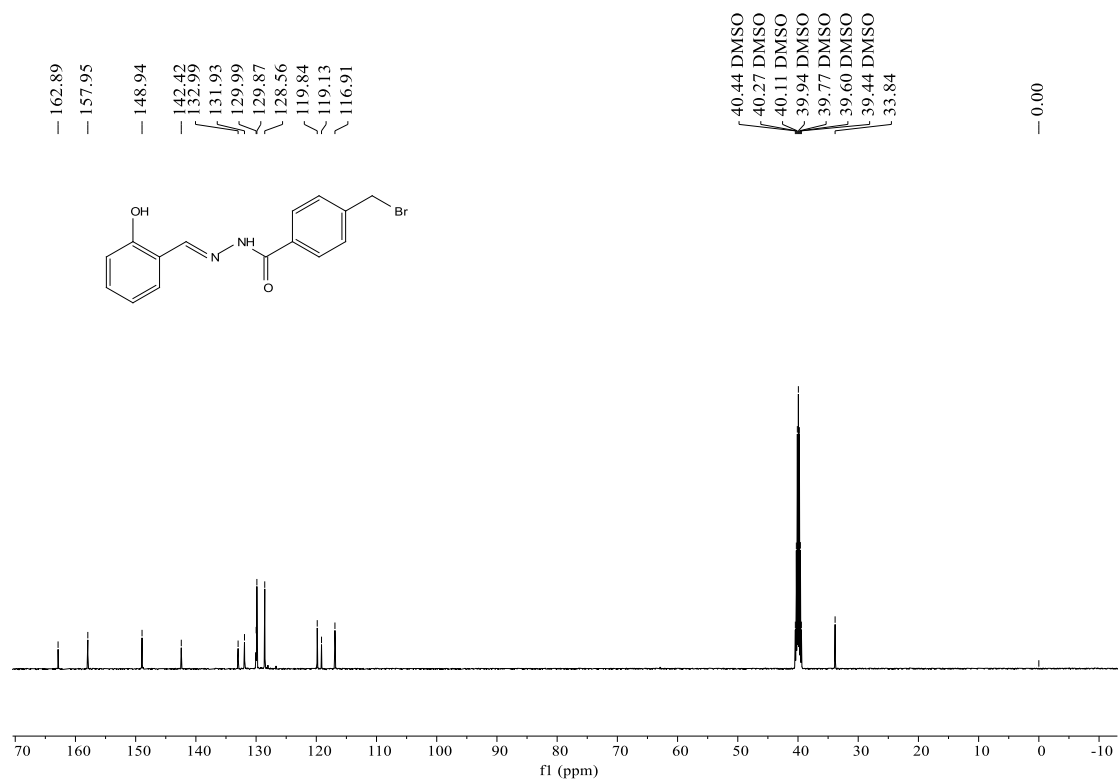

<sup>13</sup>C NMR for compound K5

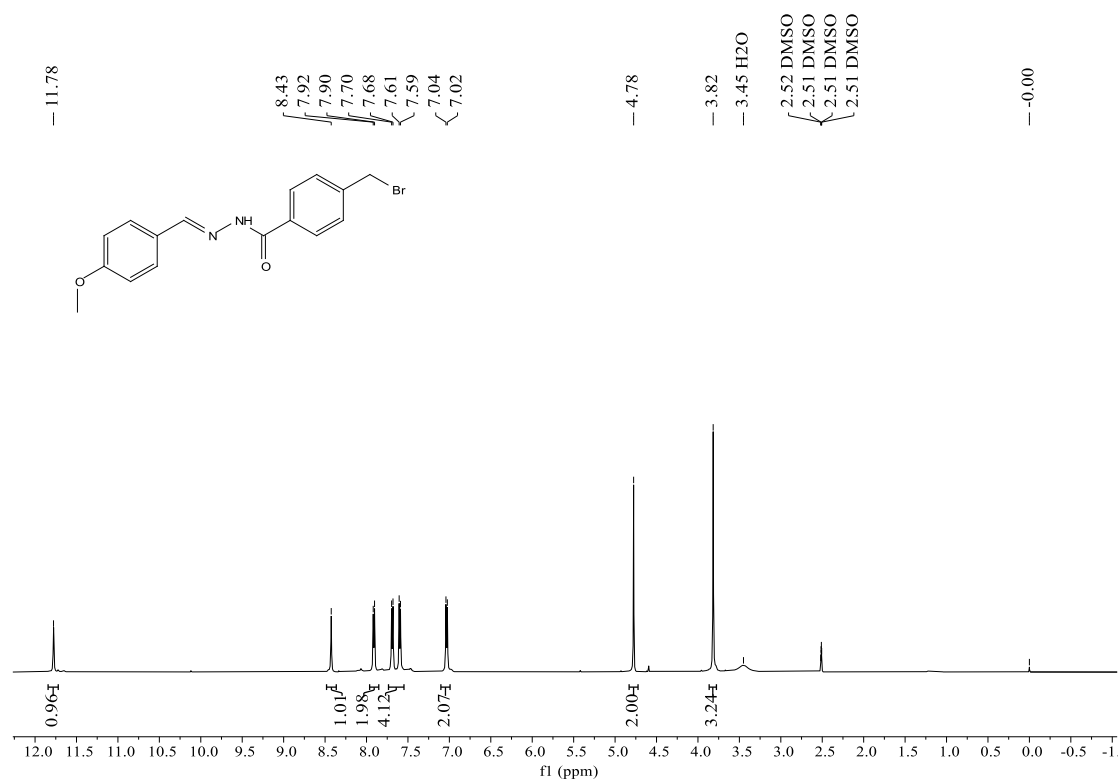

<sup>1</sup>H NMR for compound K6

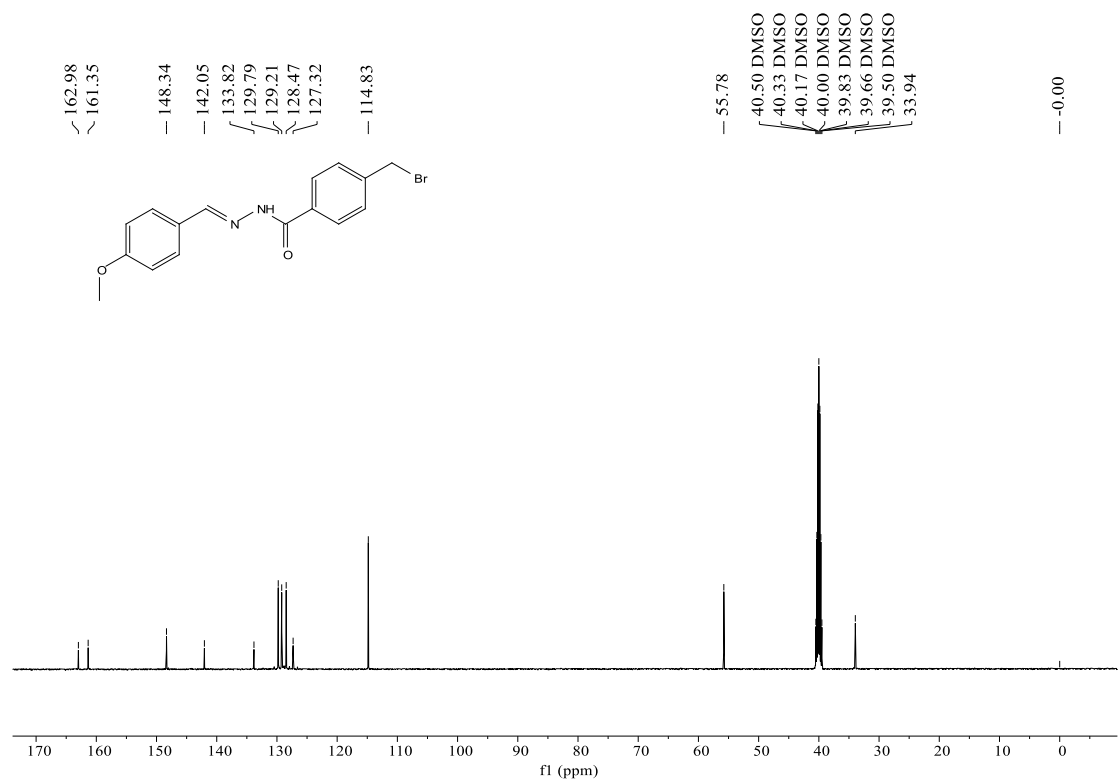

<sup>13</sup>C NMR for compound K6

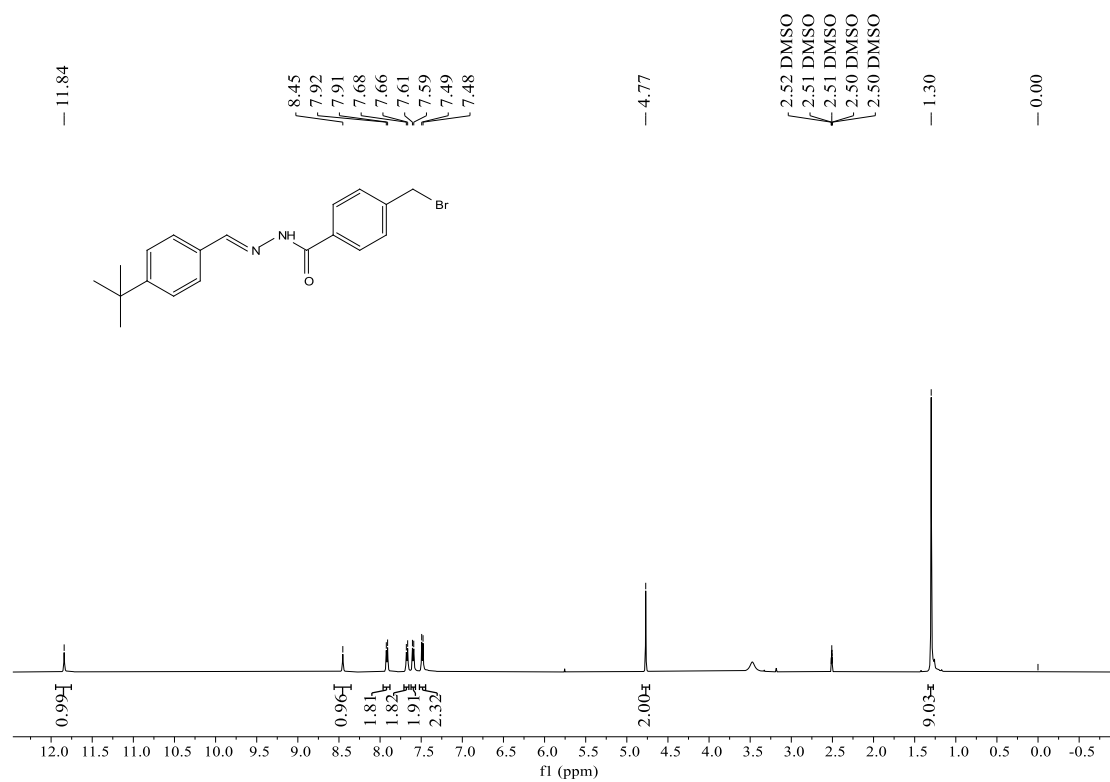

<sup>1</sup>H NMR for compound K7

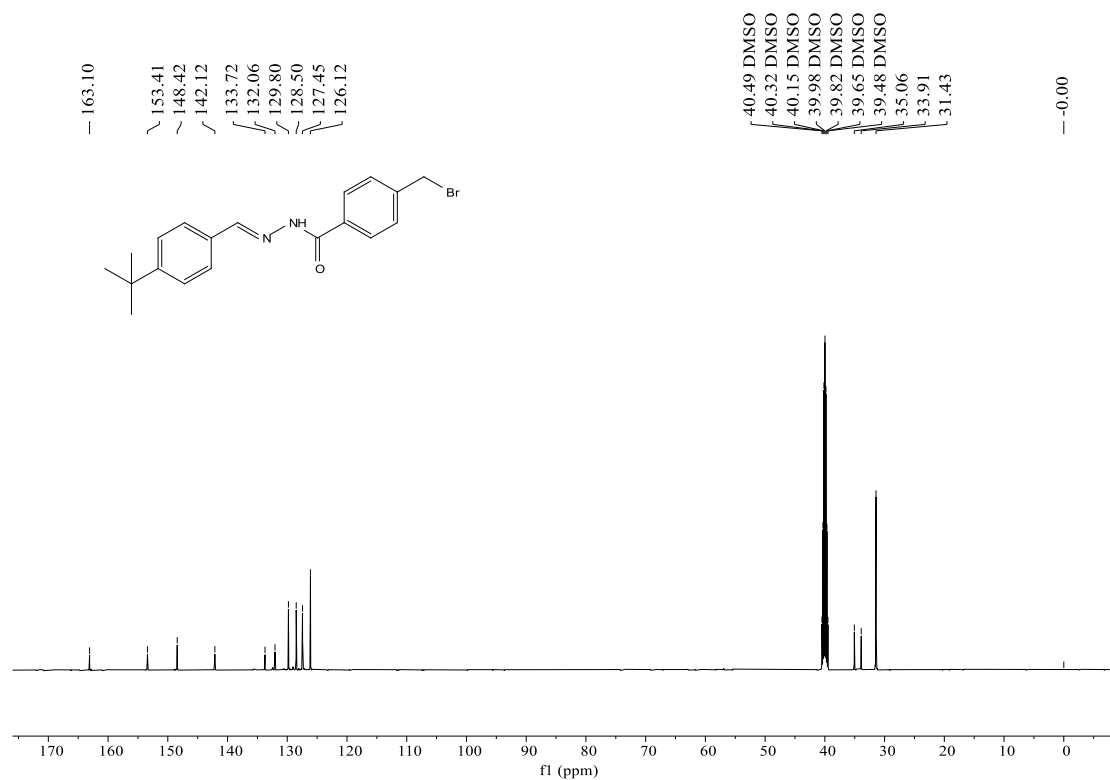

<sup>13</sup>C NMR for compound K7

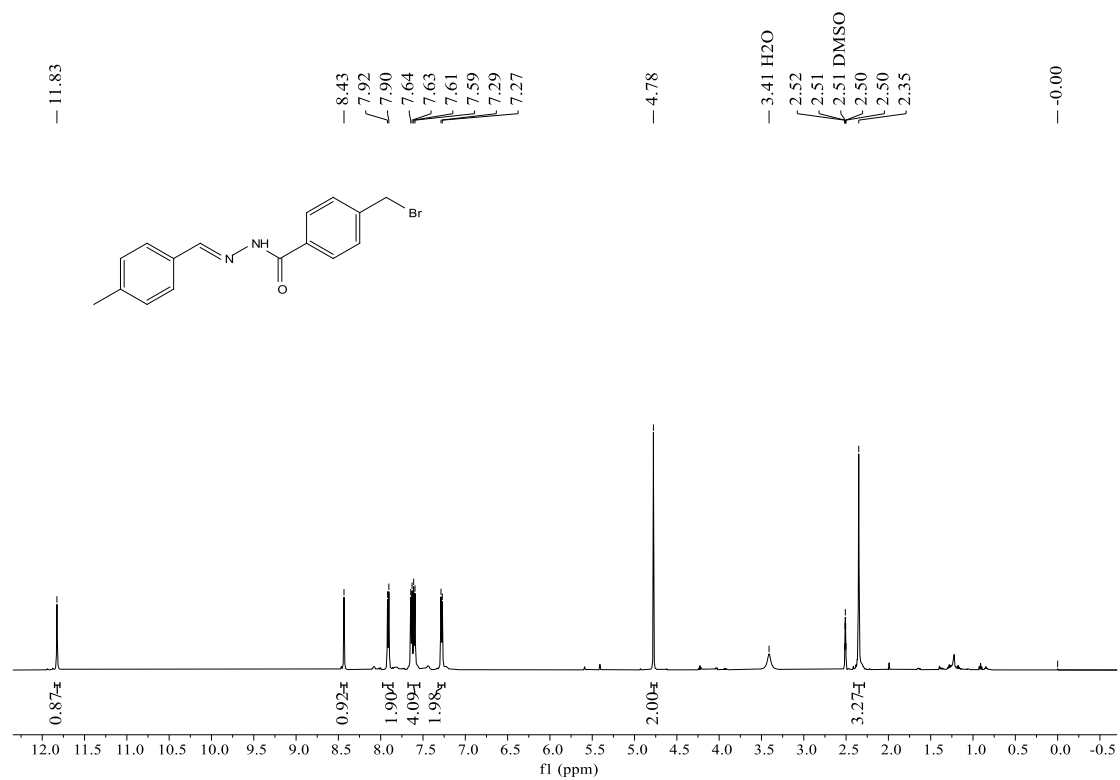

$^1\text{H}$  NMR for compound K8

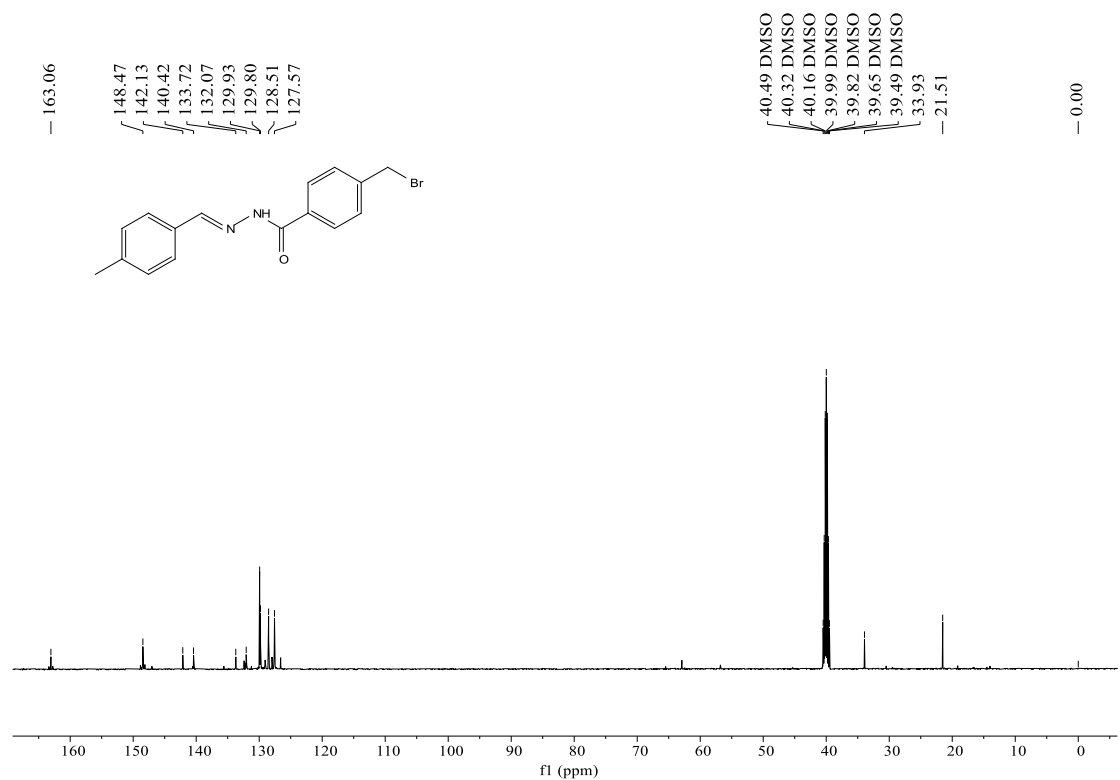

$^{13}\text{C}$  NMR for compound K8

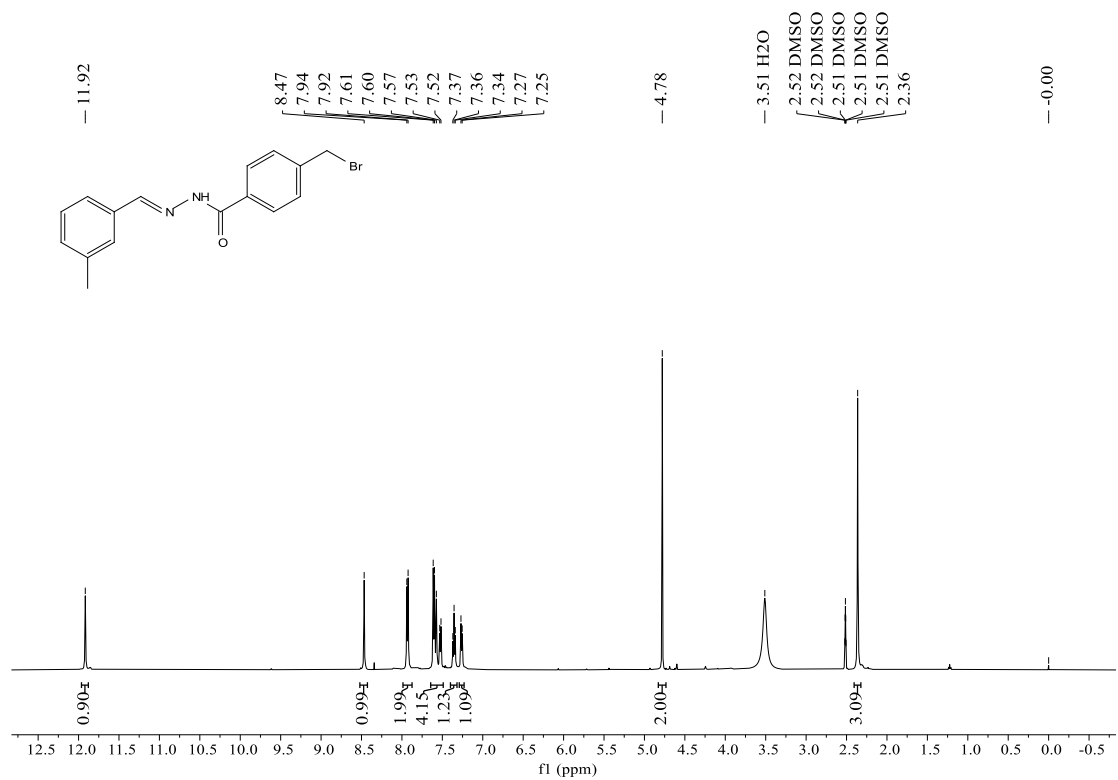

<sup>1</sup>H NMR for compound K9

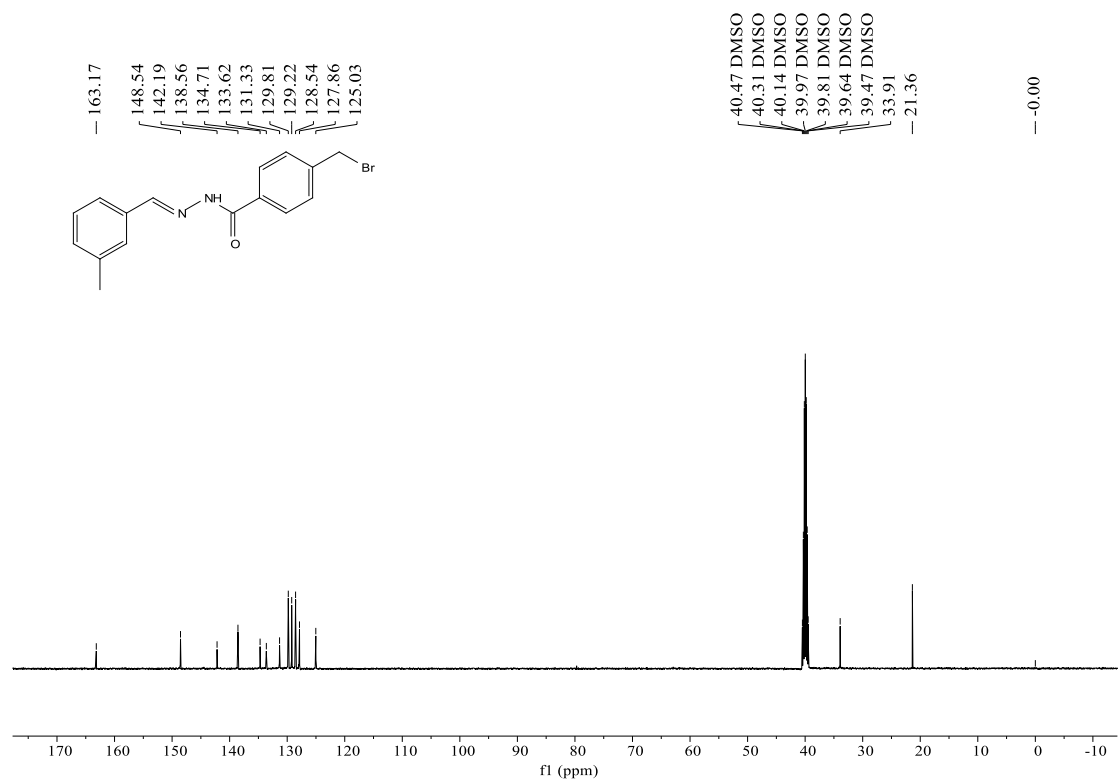

<sup>13</sup>C NMR for compound K9



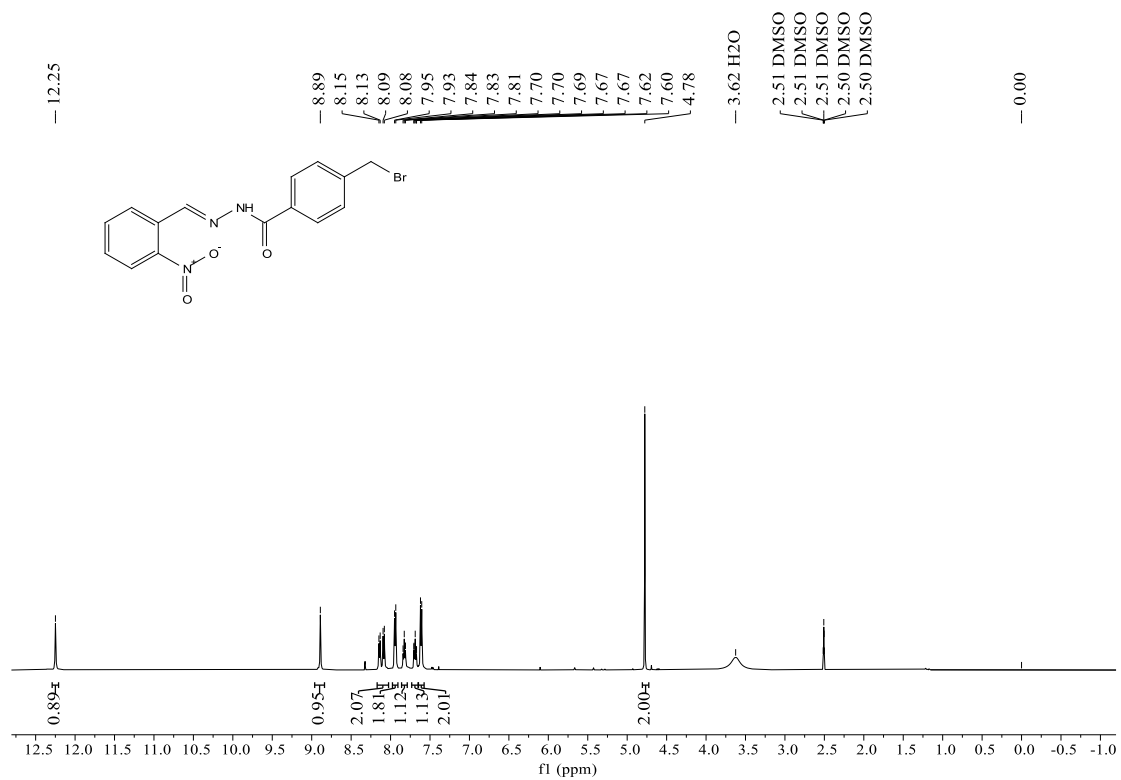

<sup>1</sup>H NMR for compound K10

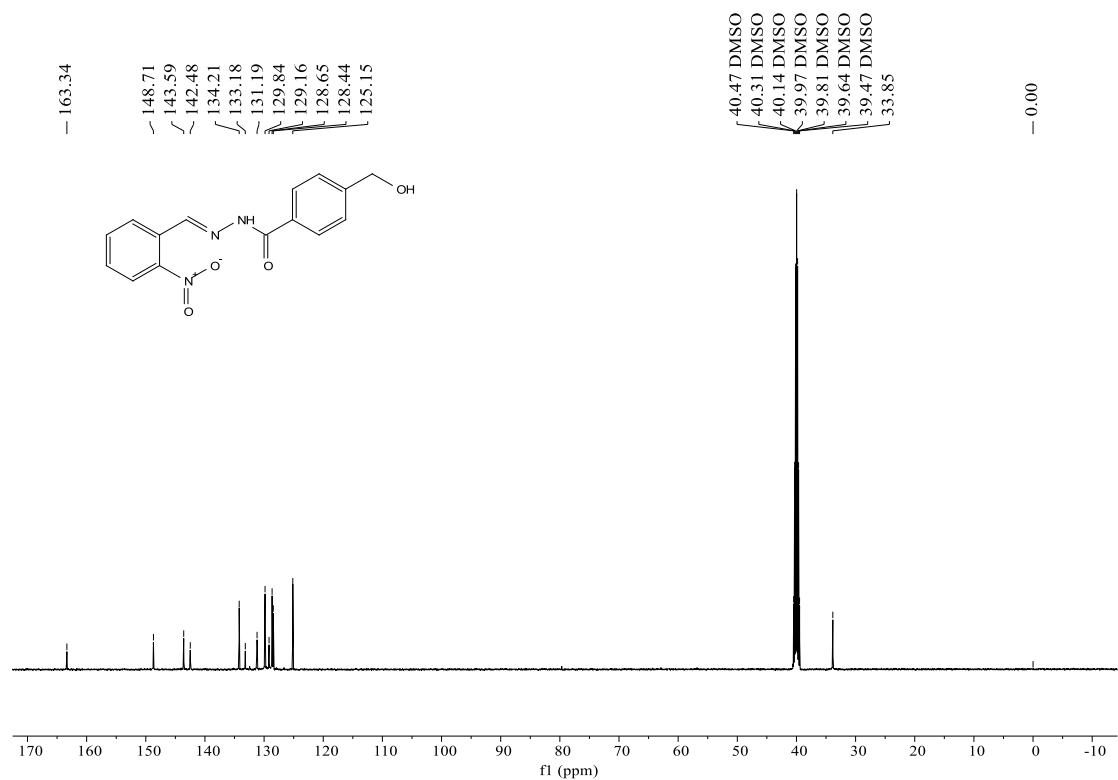

<sup>13</sup>C NMR for compound K10

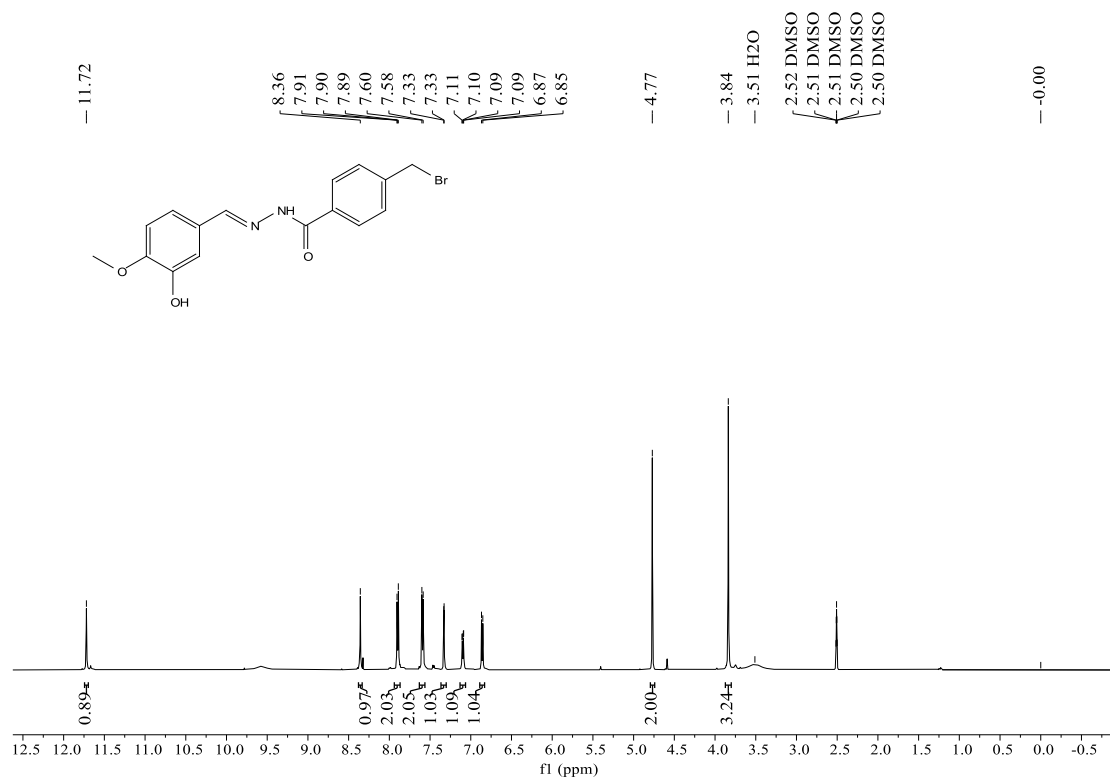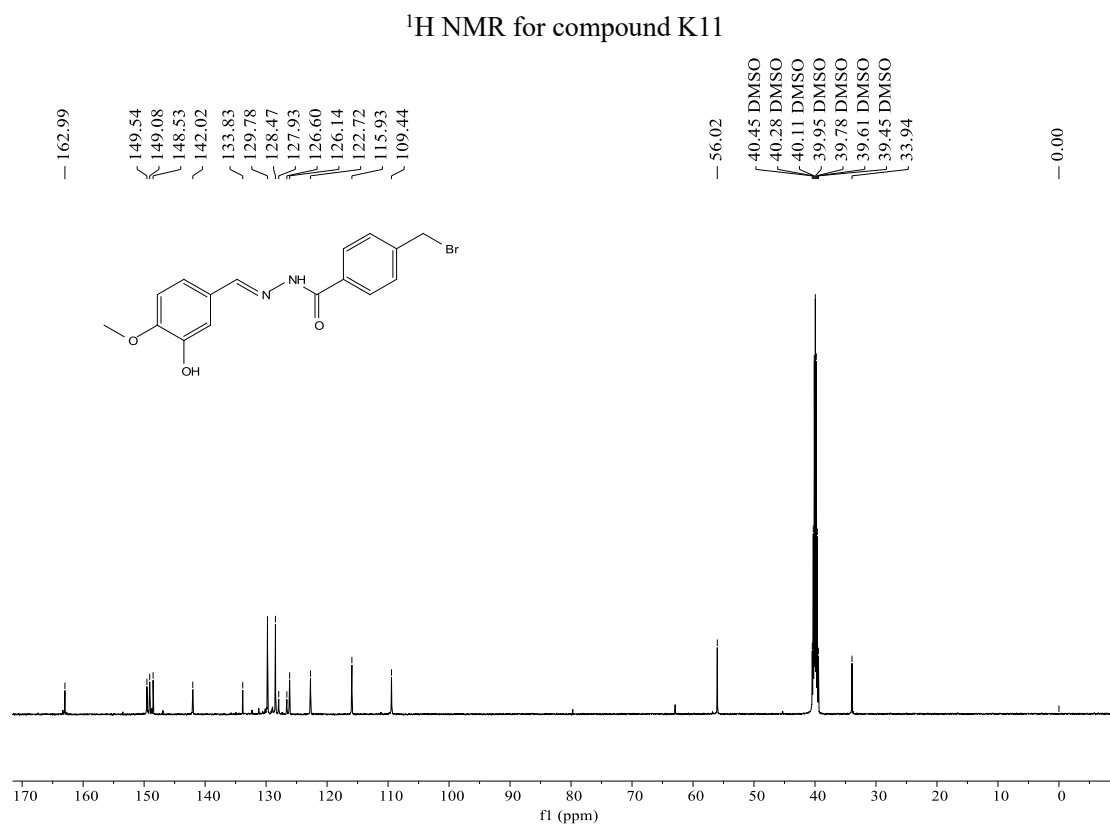

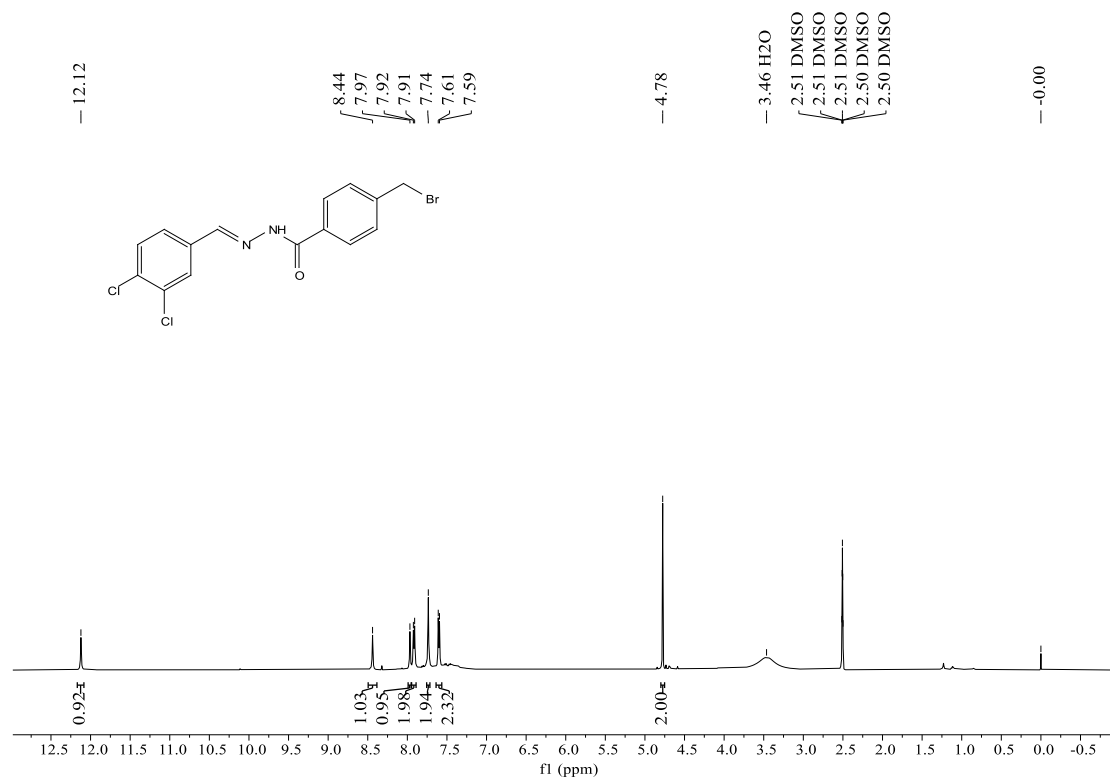

$^1\text{H}$  NMR for compound K11

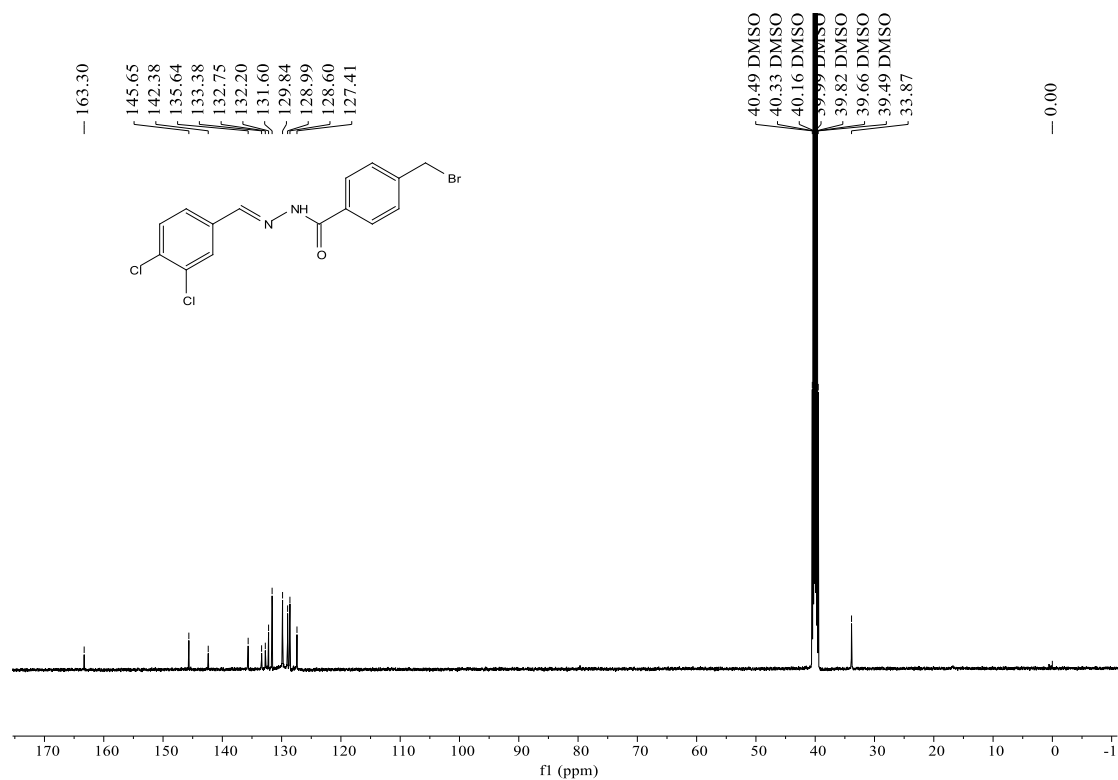

$^{13}\text{C}$  NMR for compound K11

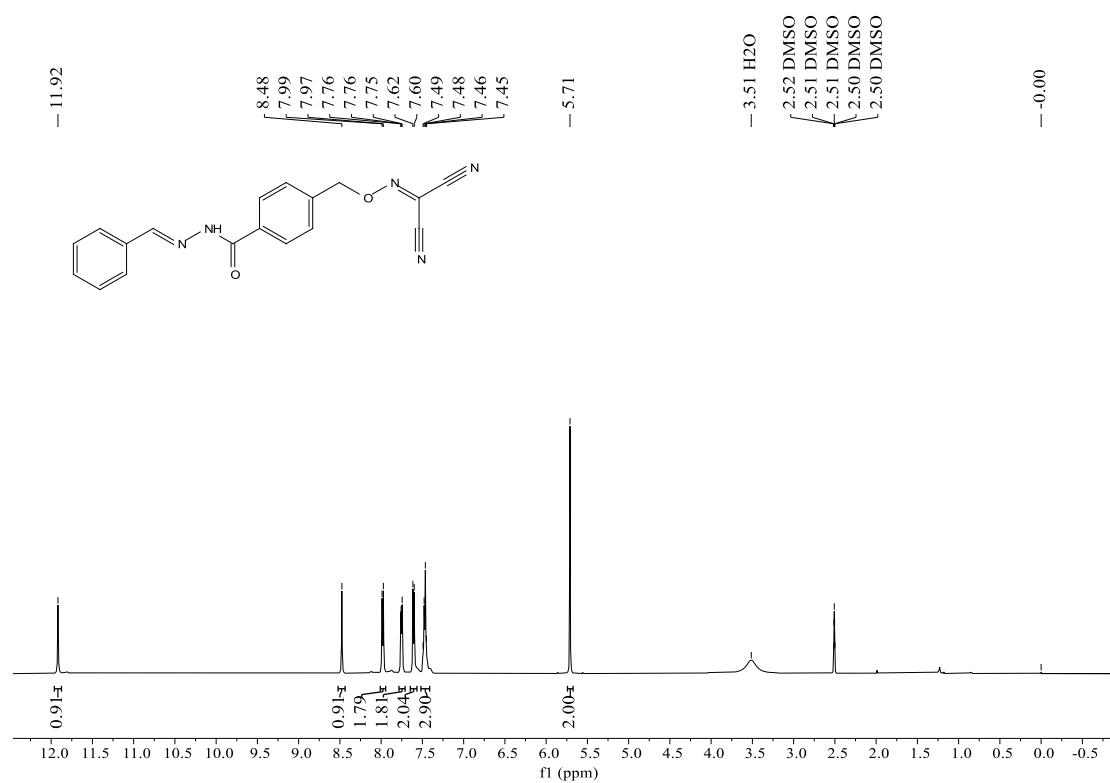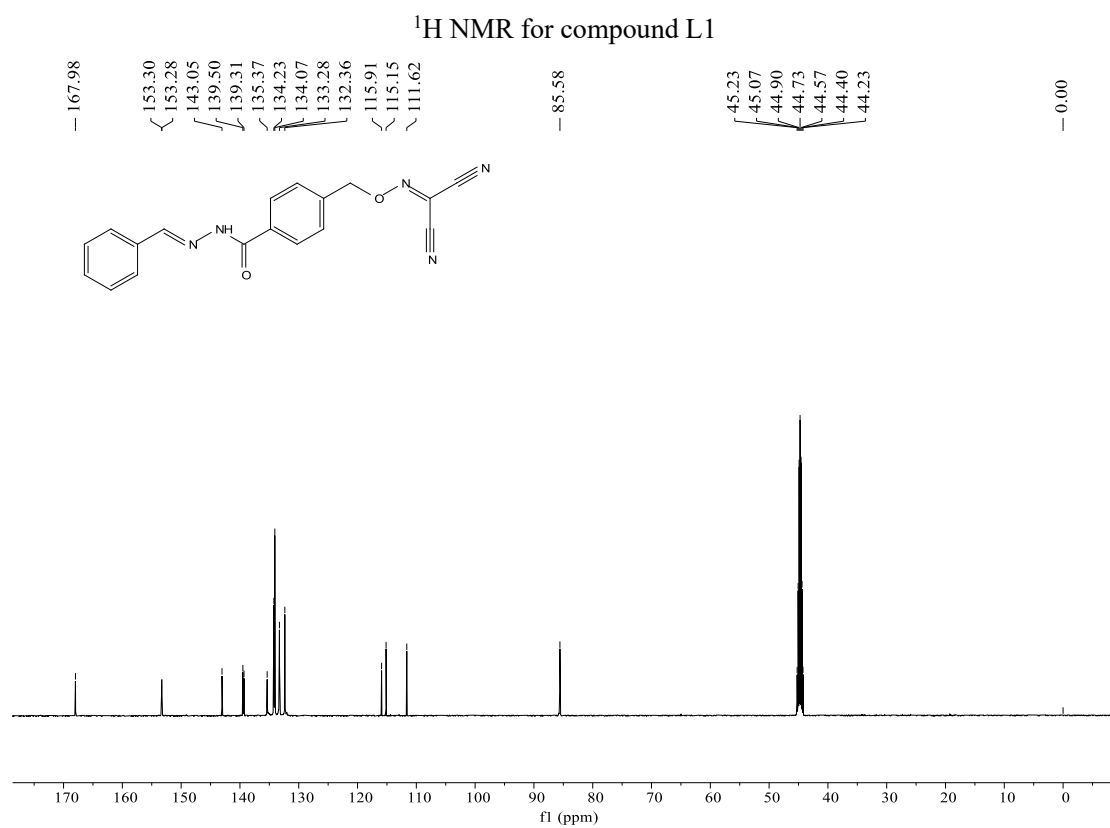

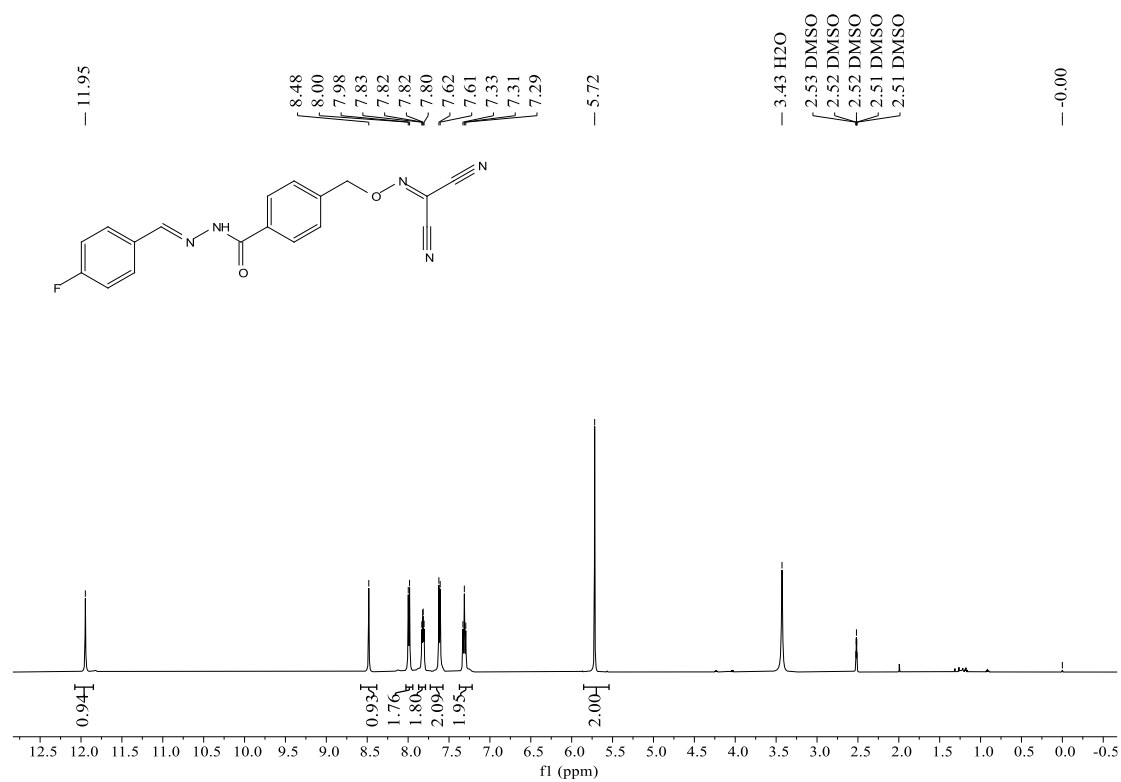

**<sup>1</sup>H NMR for compound L2**

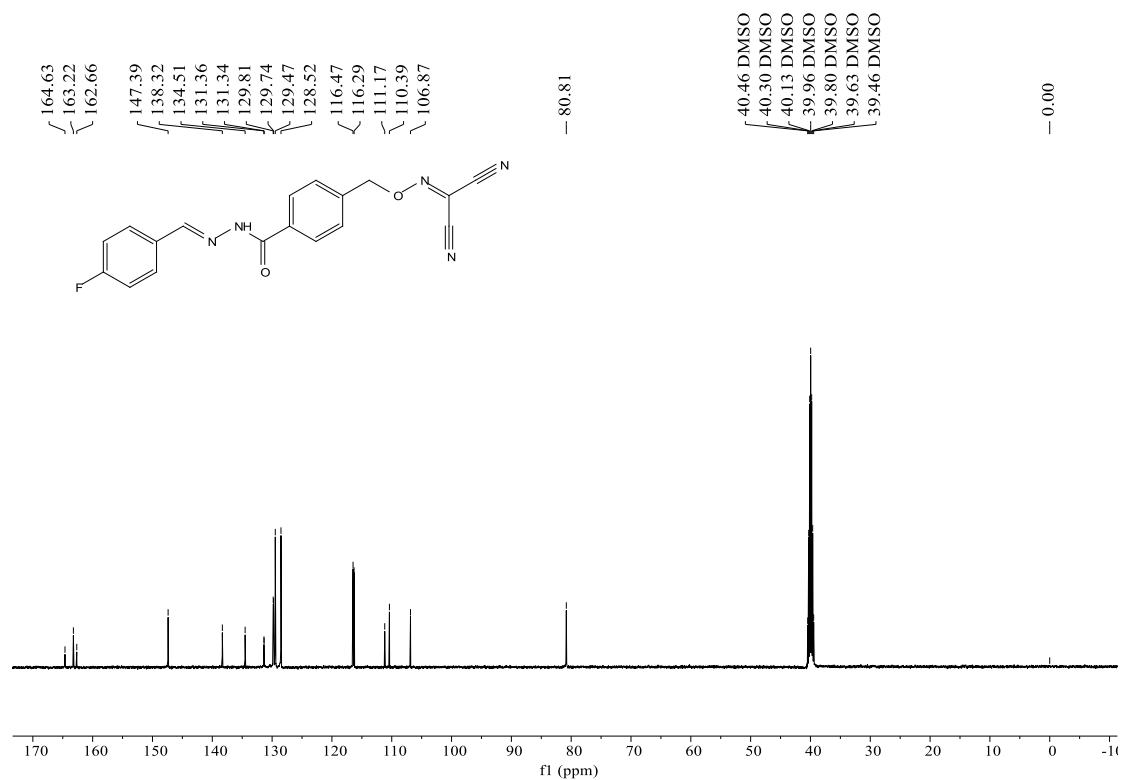

**<sup>13</sup>C NMR for compound L2**

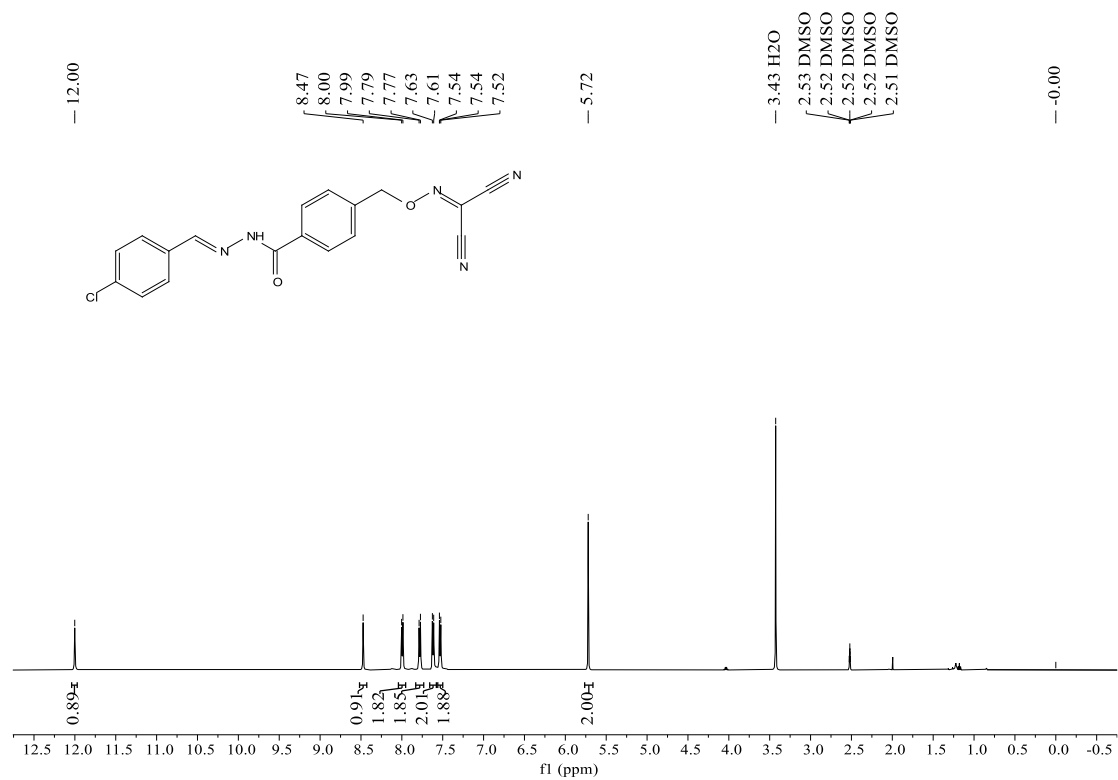

<sup>1</sup>H NMR for compound L3

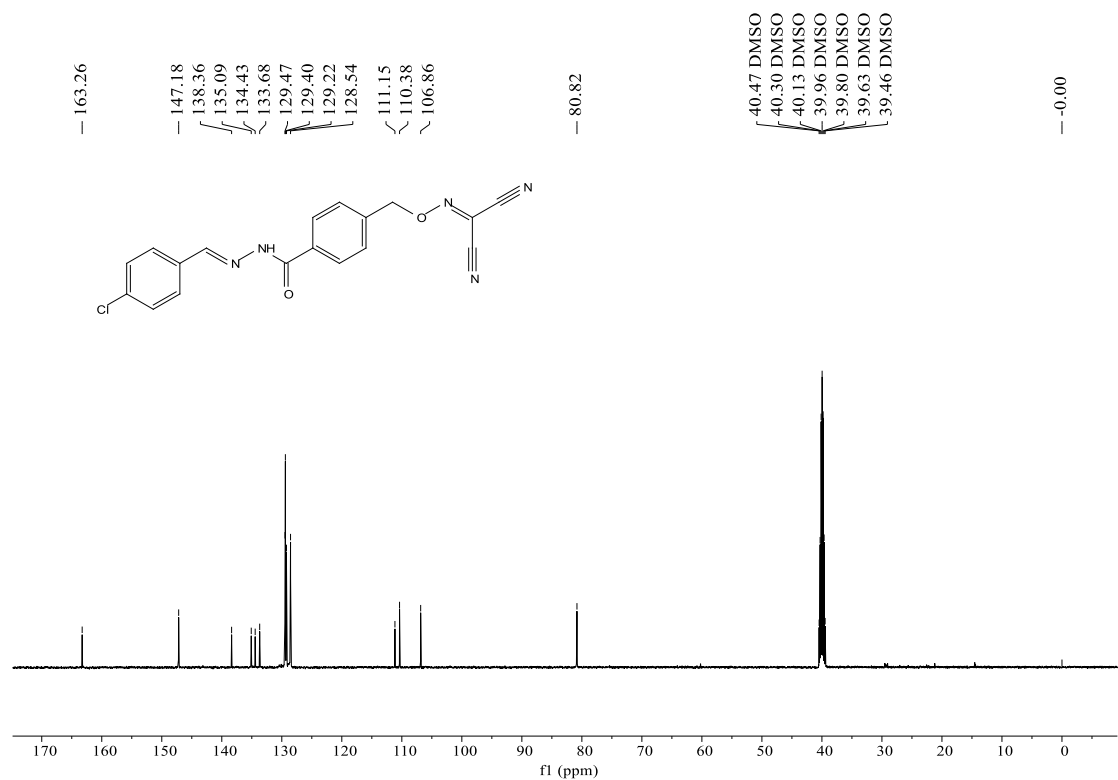

<sup>13</sup>C NMR for compound L3

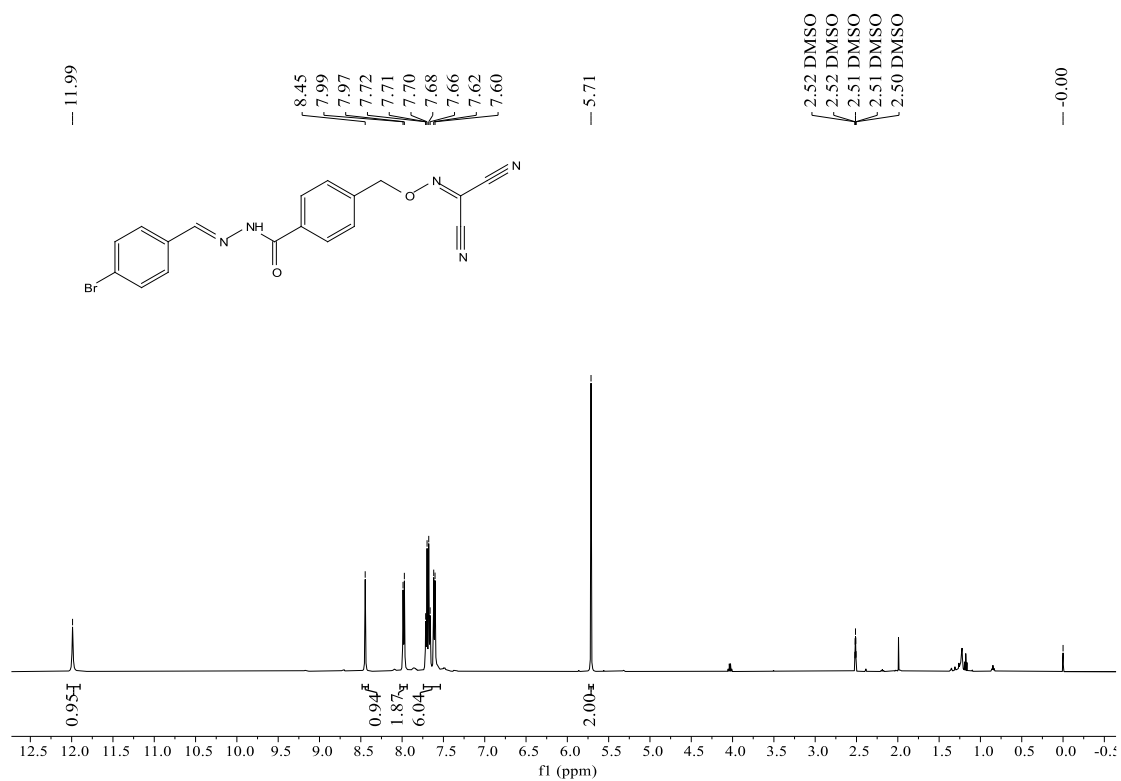

<sup>1</sup>H NMR for compound L4

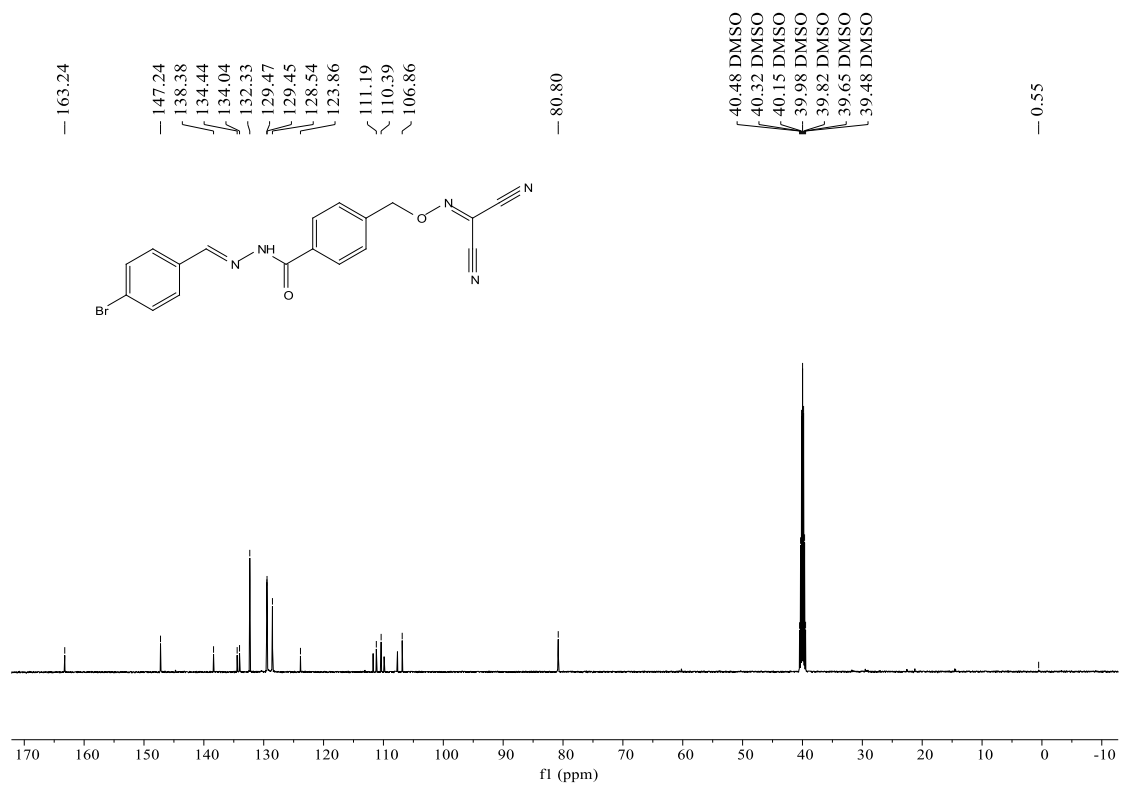

<sup>13</sup>C NMR for compound L4

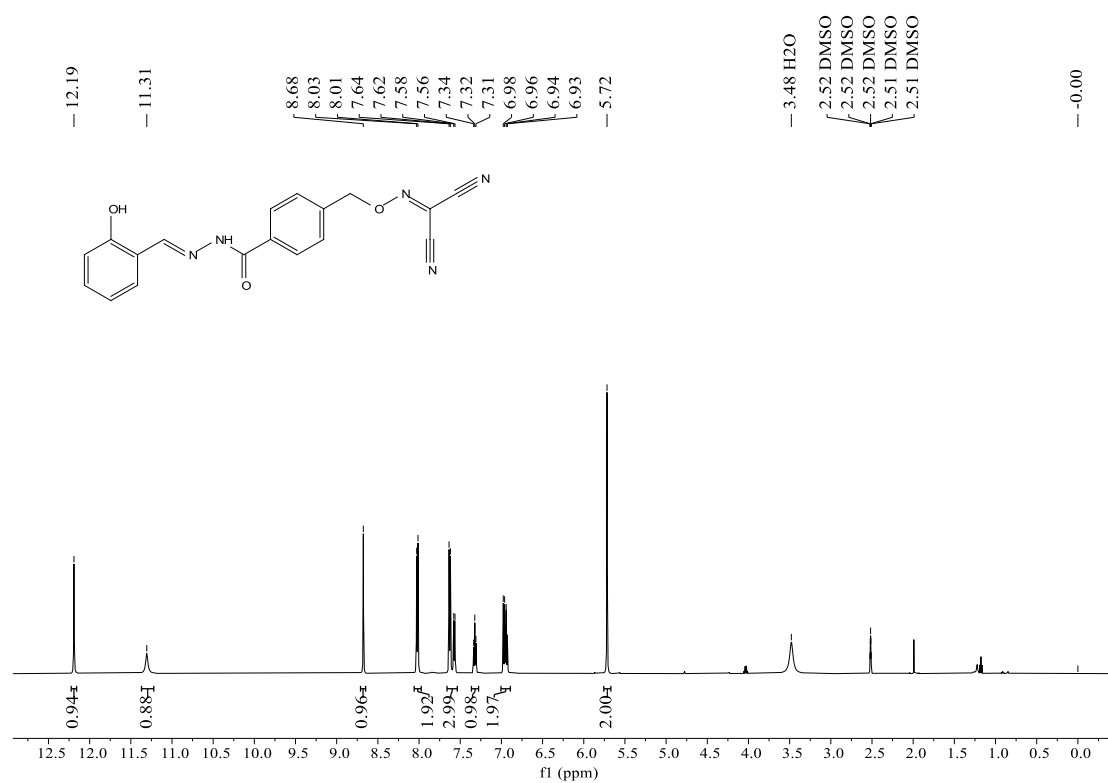

<sup>1</sup>H NMR for compound L5

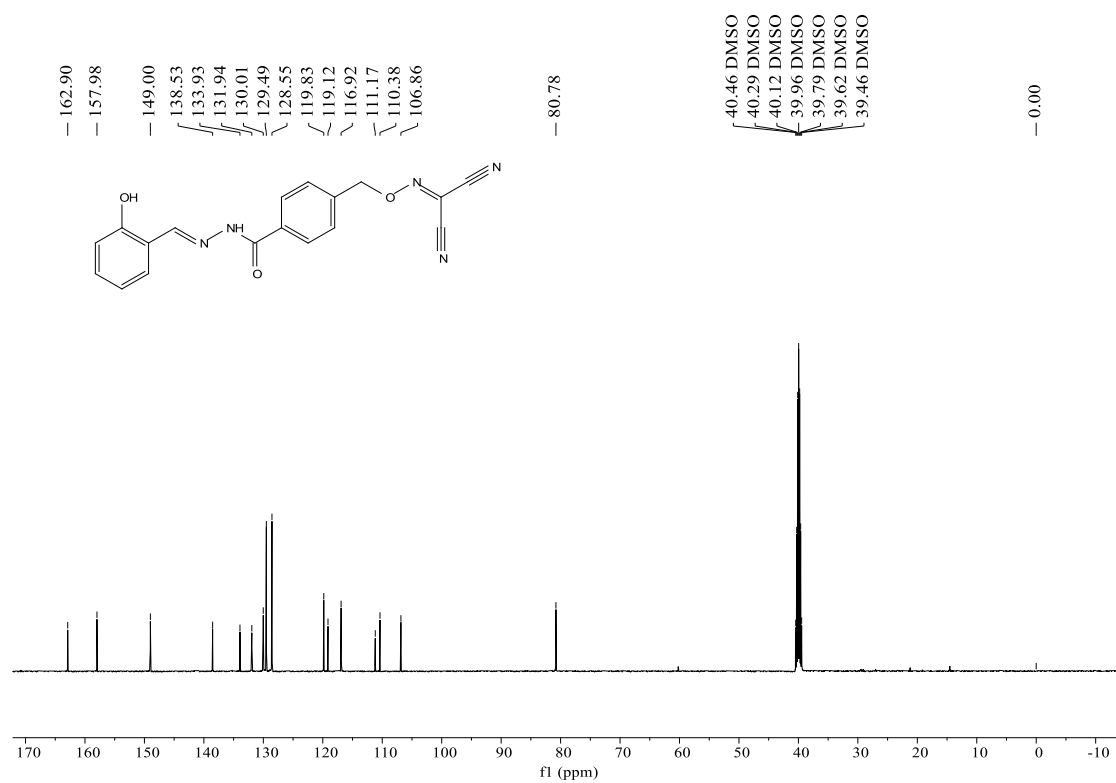

<sup>13</sup>C NMR for compound L5



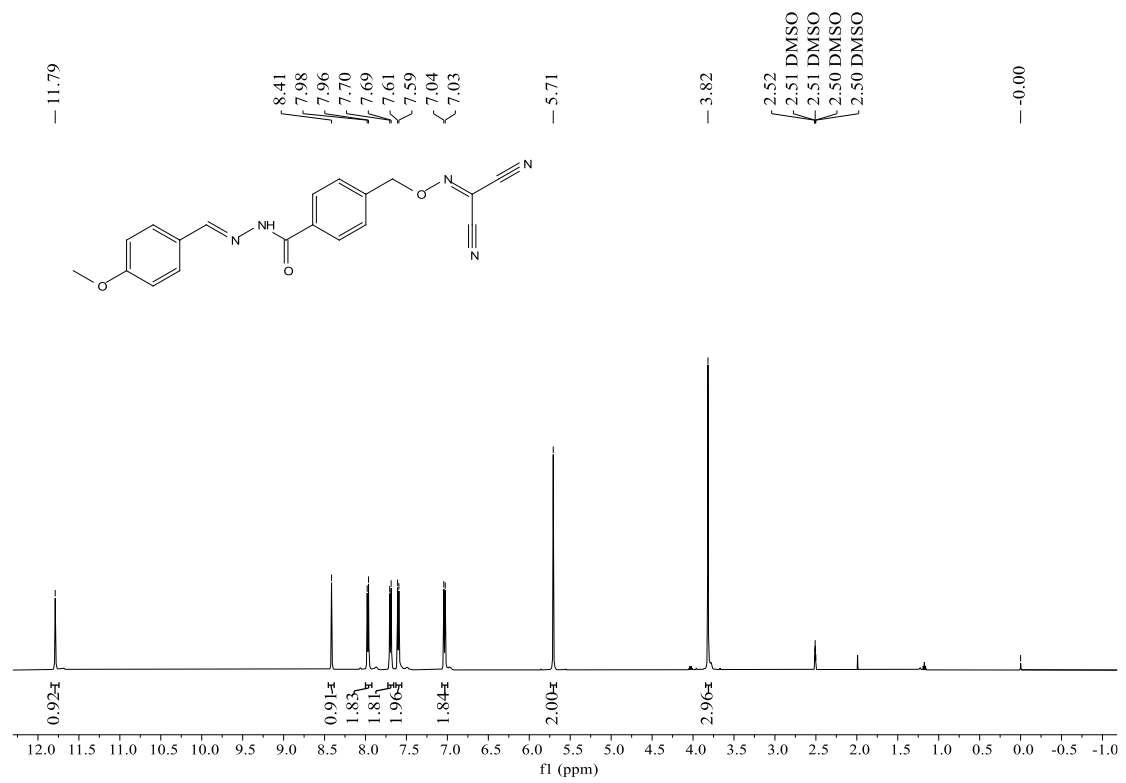

<sup>1</sup>H NMR for compound L6

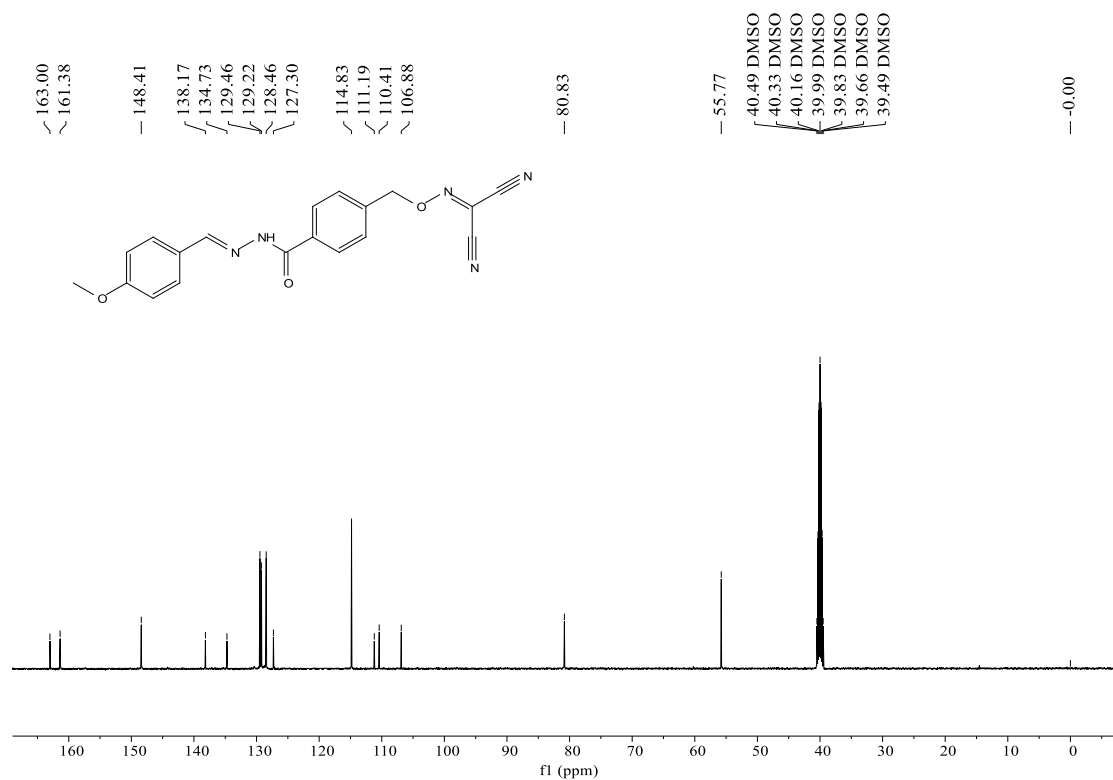

<sup>13</sup>C NMR for compound L6

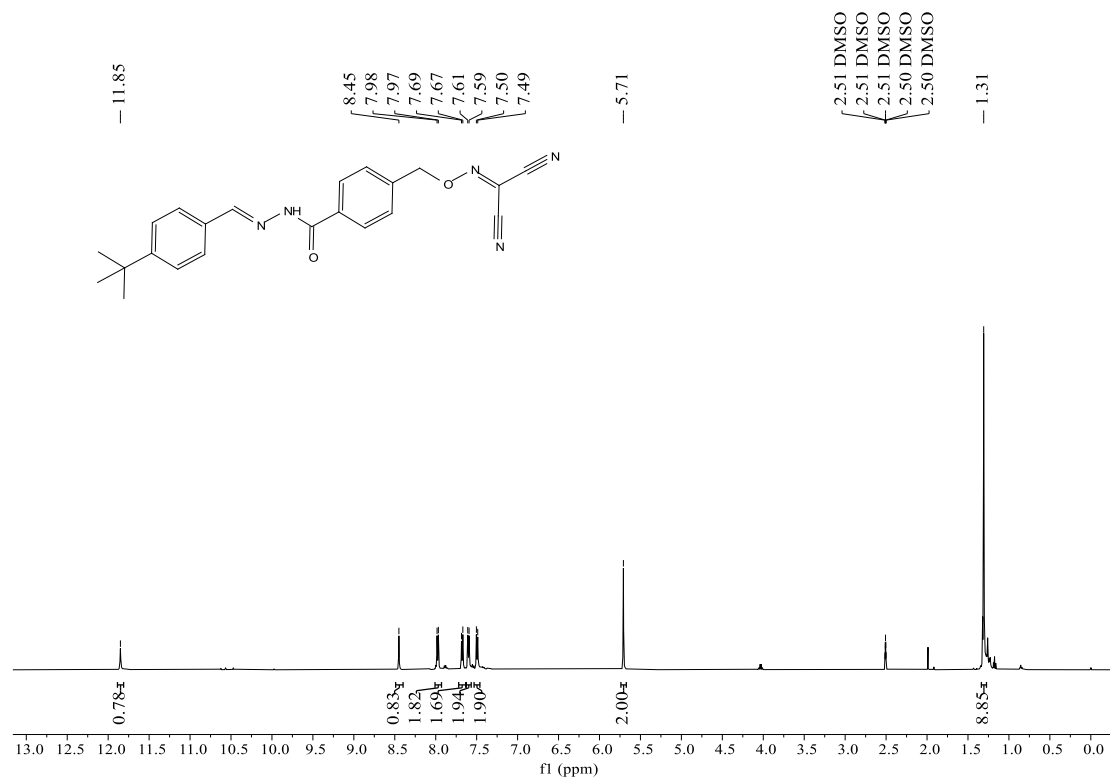

<sup>1</sup>H NMR for compound L7

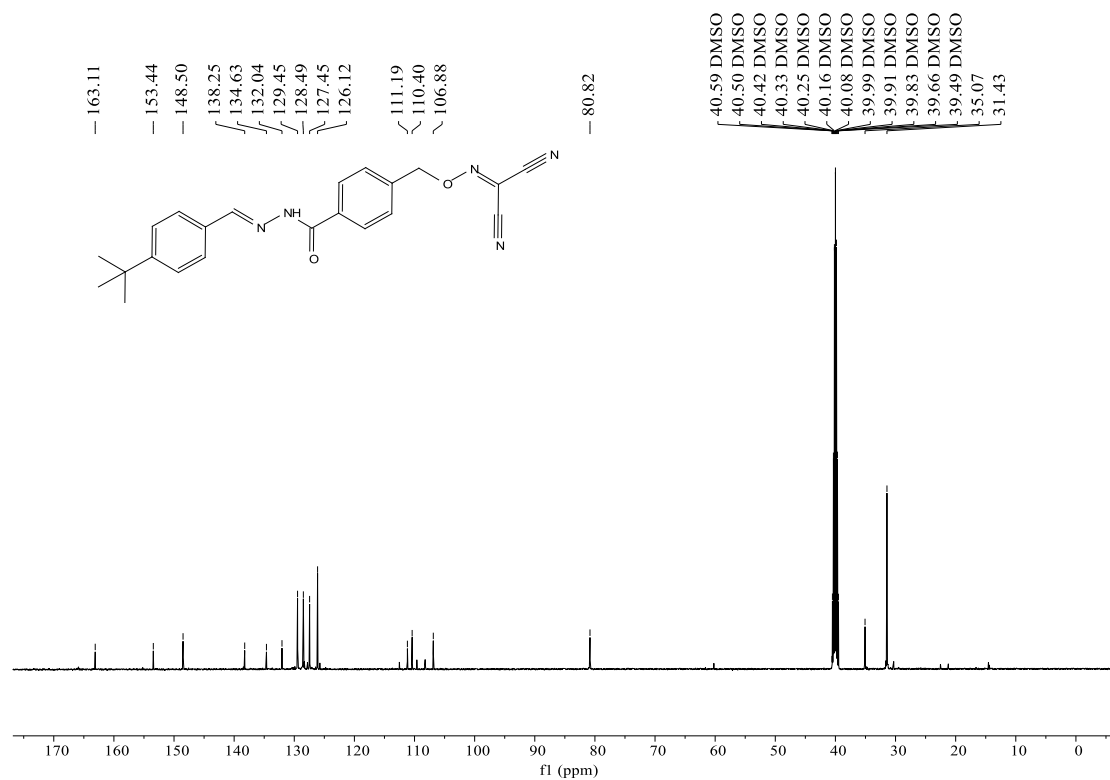

<sup>13</sup>C NMR for compound L7

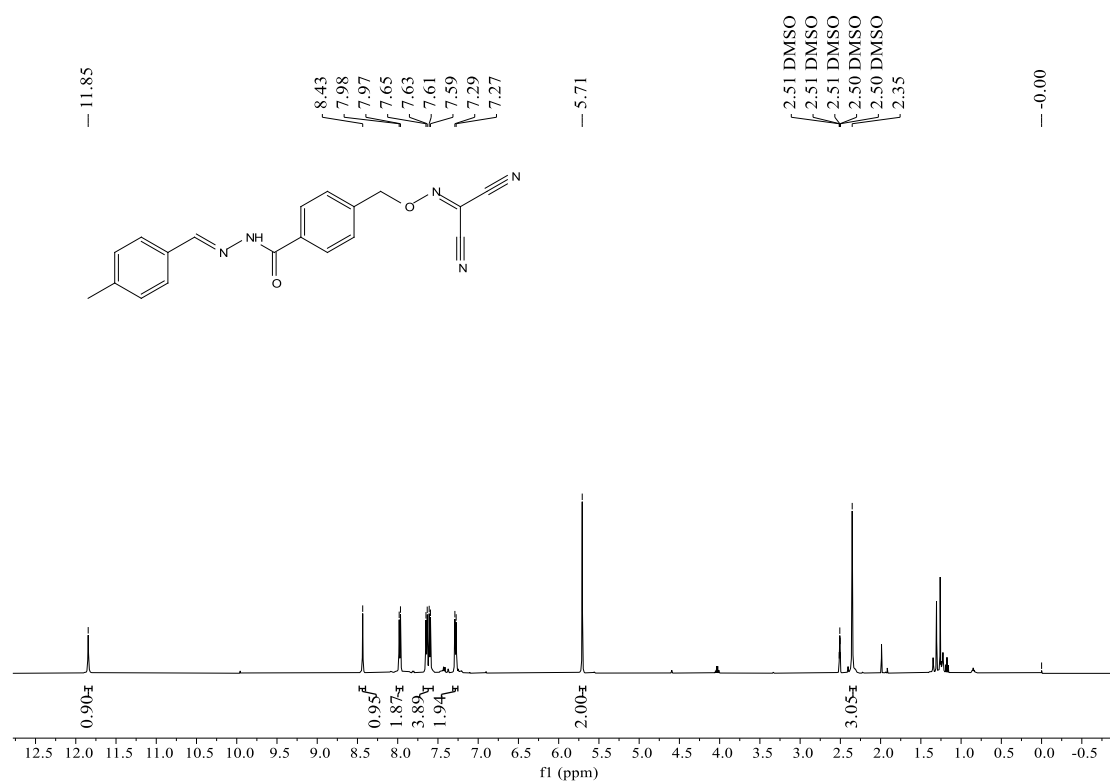

$^1\text{H}$  NMR for compound L8

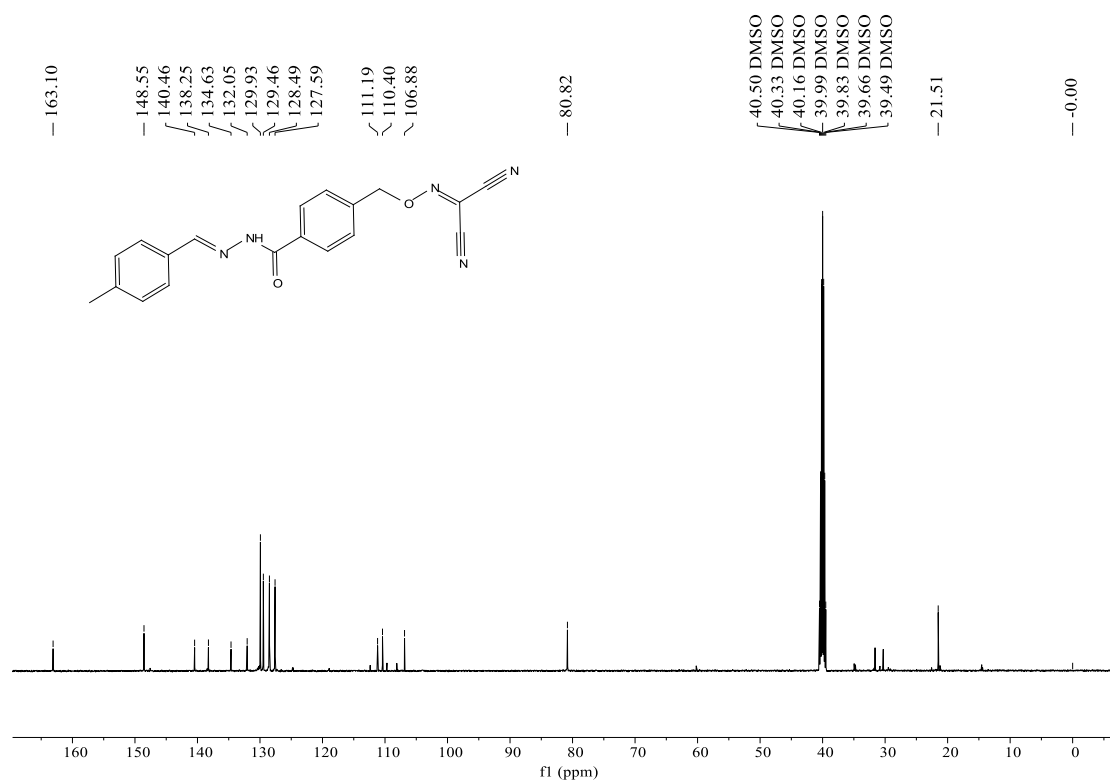

$^{13}\text{C}$  NMR for compound L8

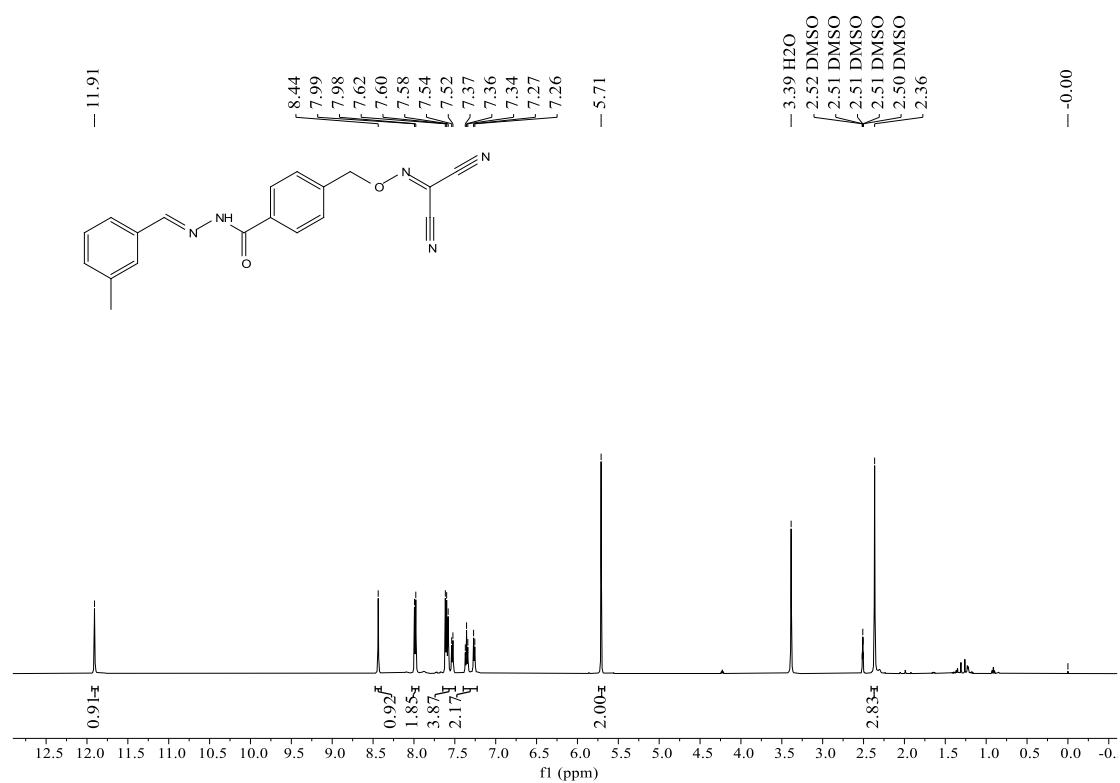

<sup>1</sup>H NMR for compound L9

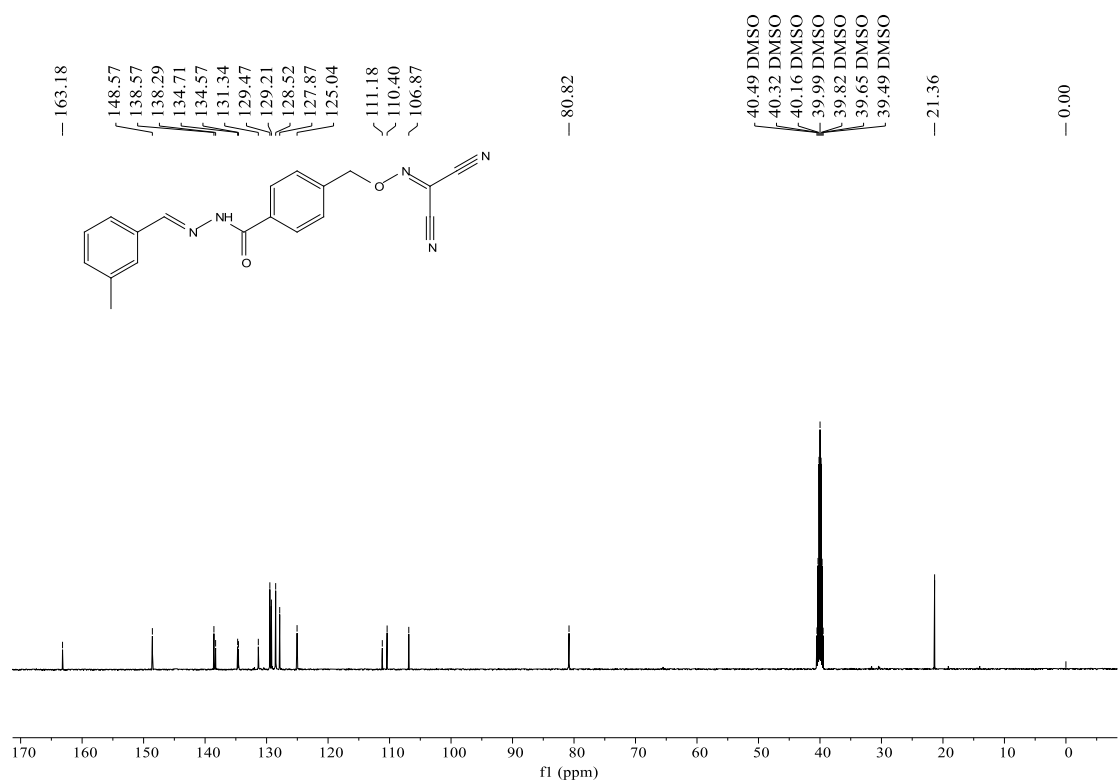

<sup>13</sup>C NMR for compound L9

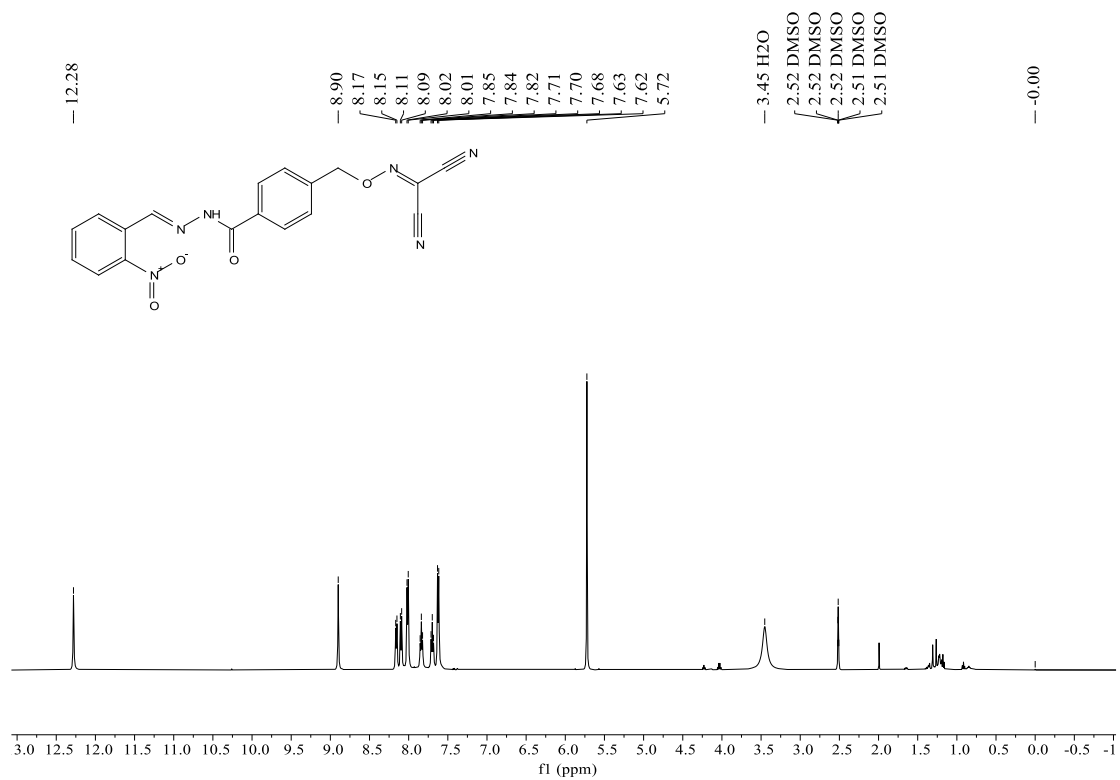

<sup>1</sup>H NMR for compound L10

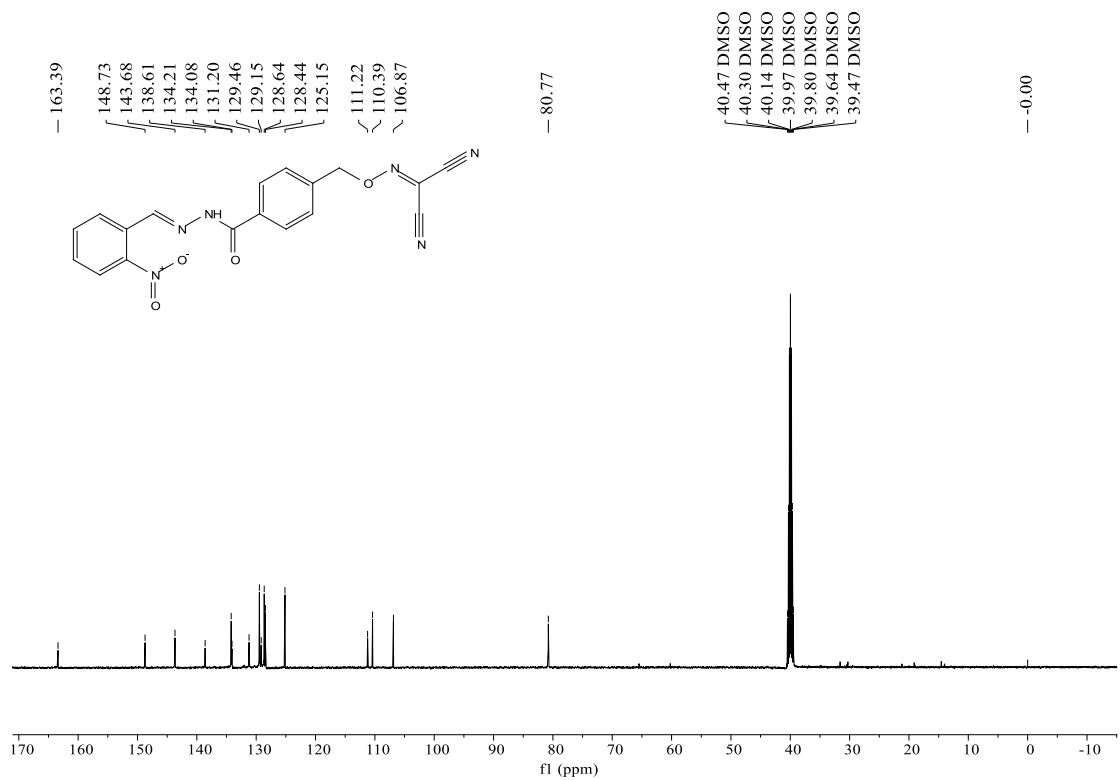

<sup>13</sup>C NMR for compound L10

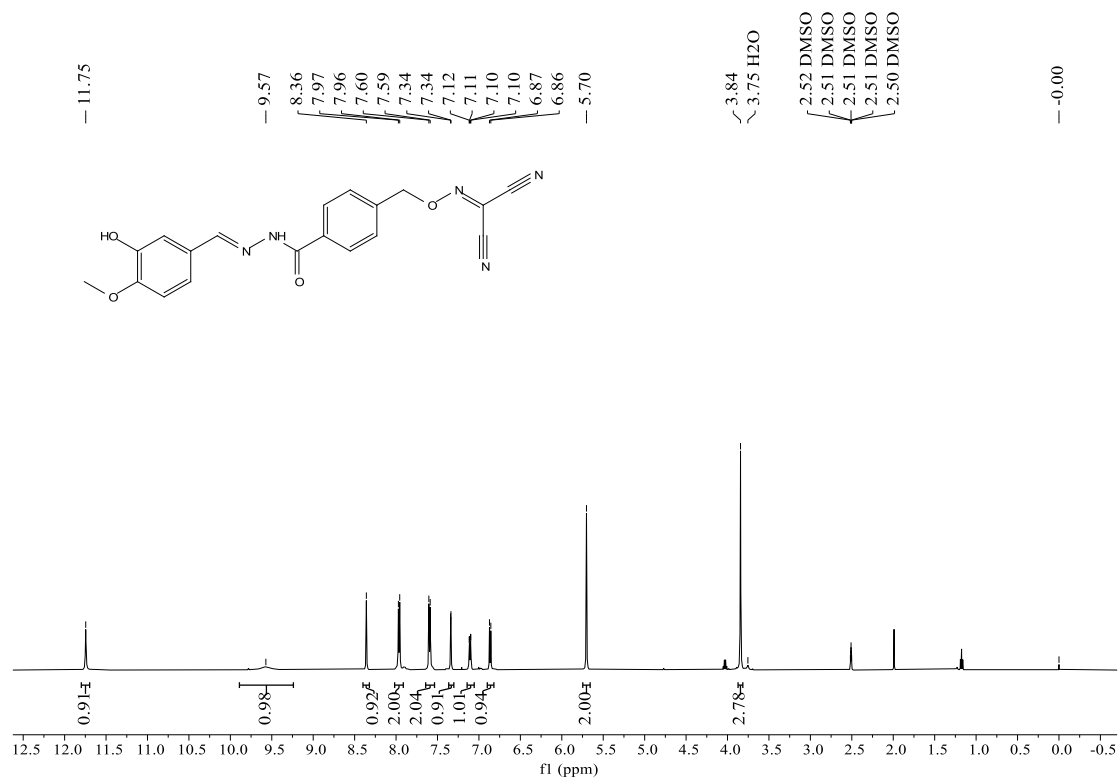

<sup>1</sup>H NMR for compound L11

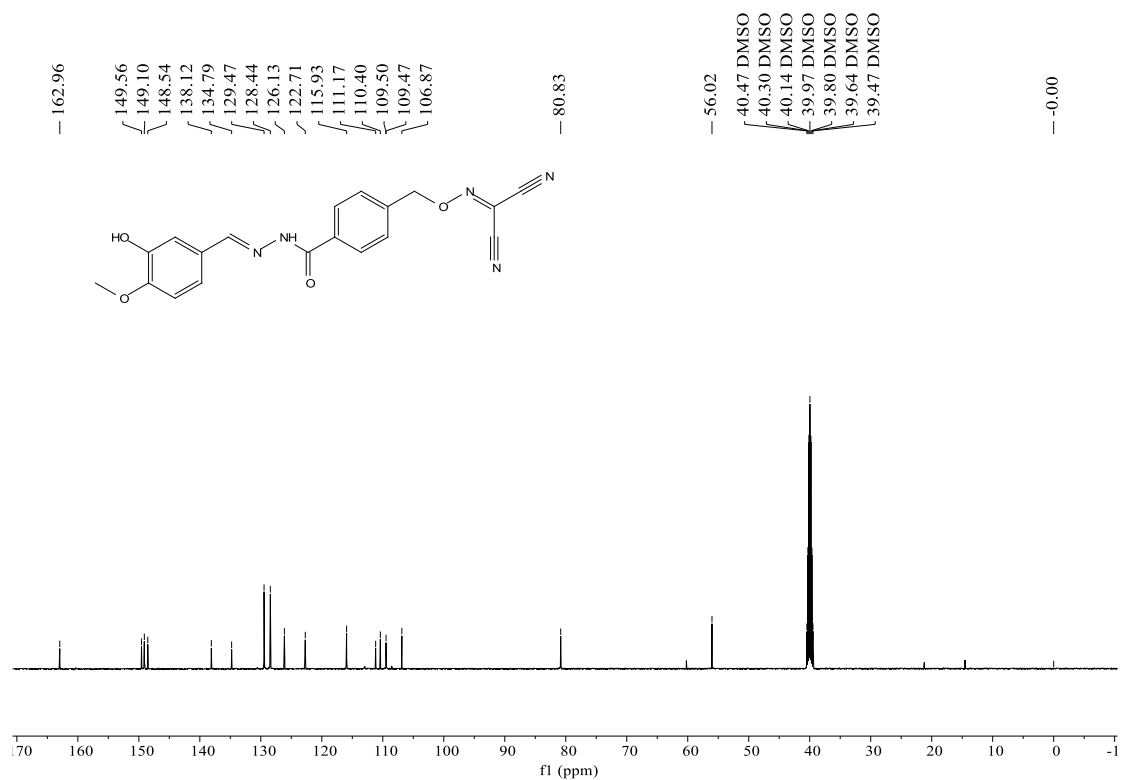

<sup>13</sup>C NMR for compound L11

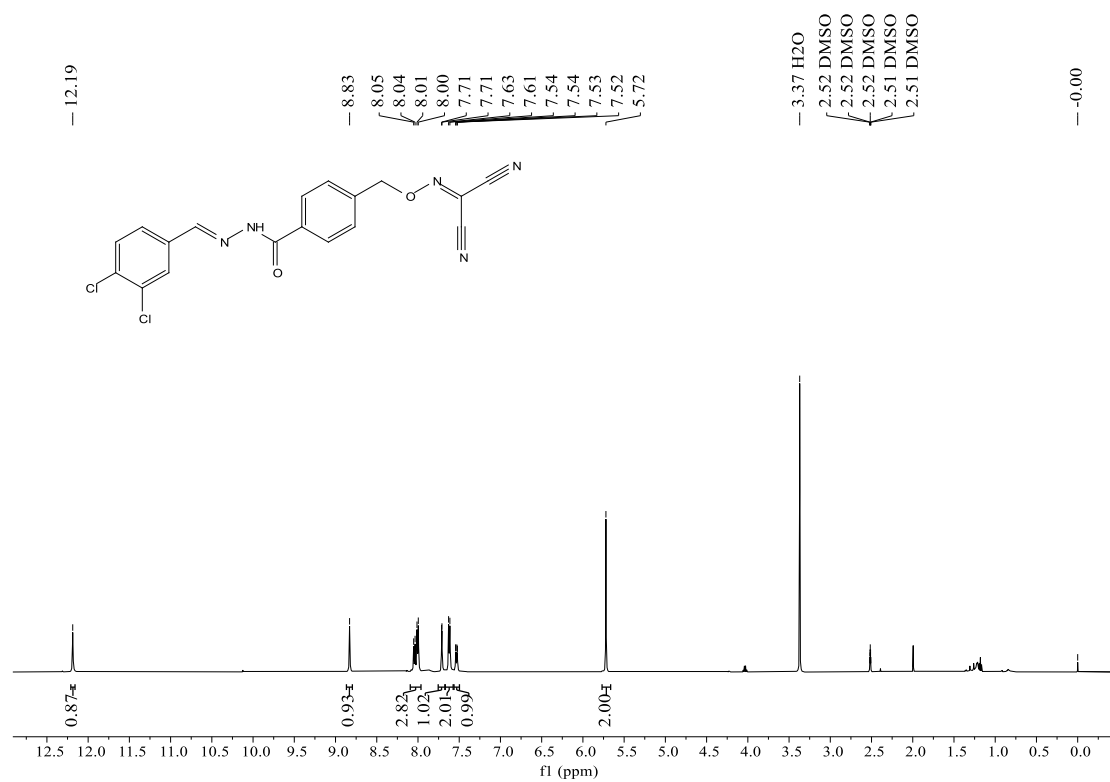

<sup>1</sup>H NMR for compound L12

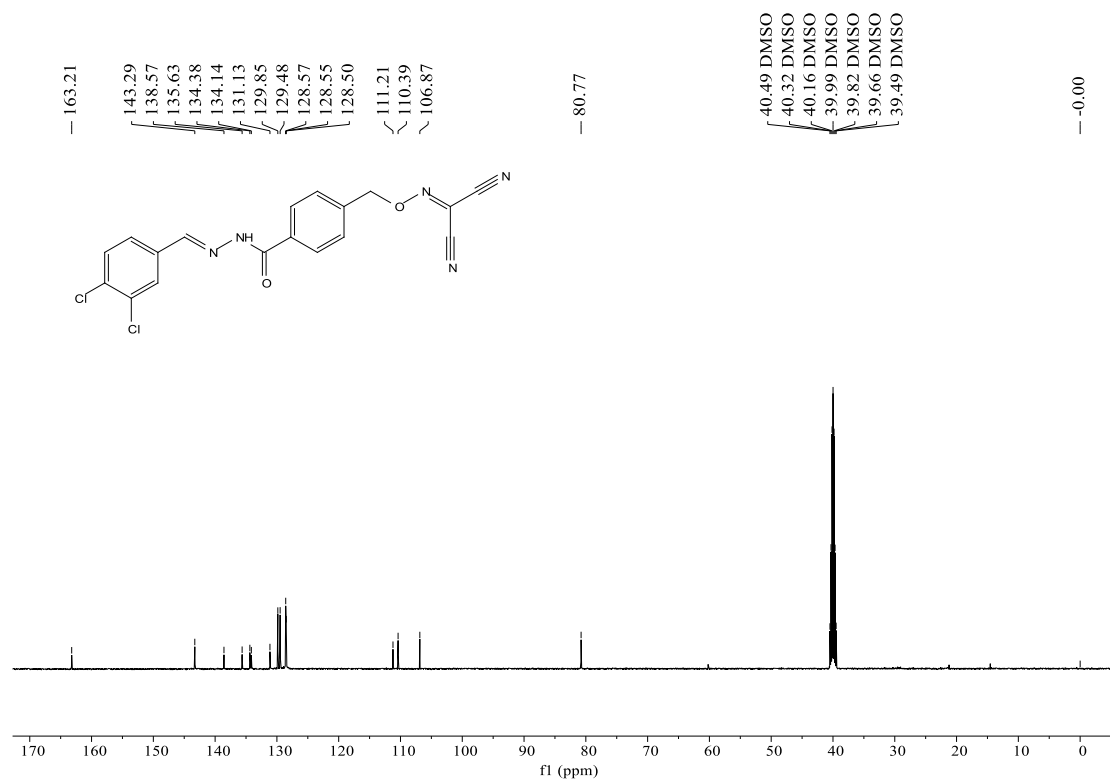

<sup>13</sup>C NMR for compound L12

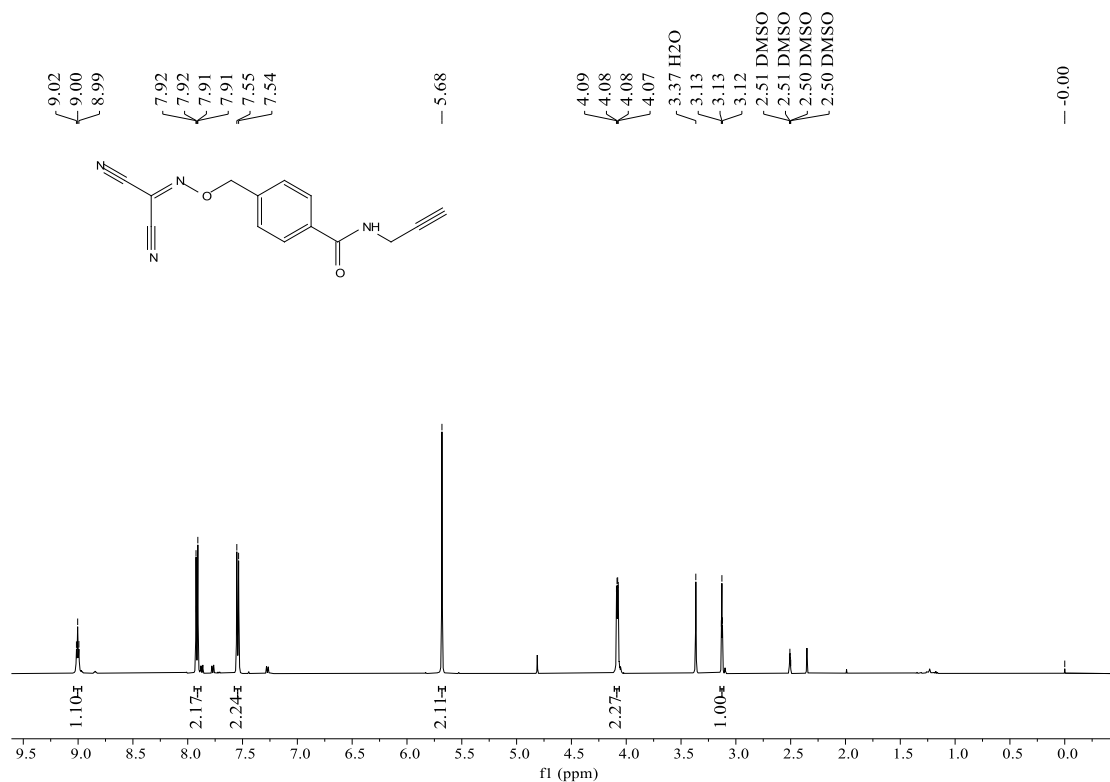

<sup>1</sup>H NMR for compound d

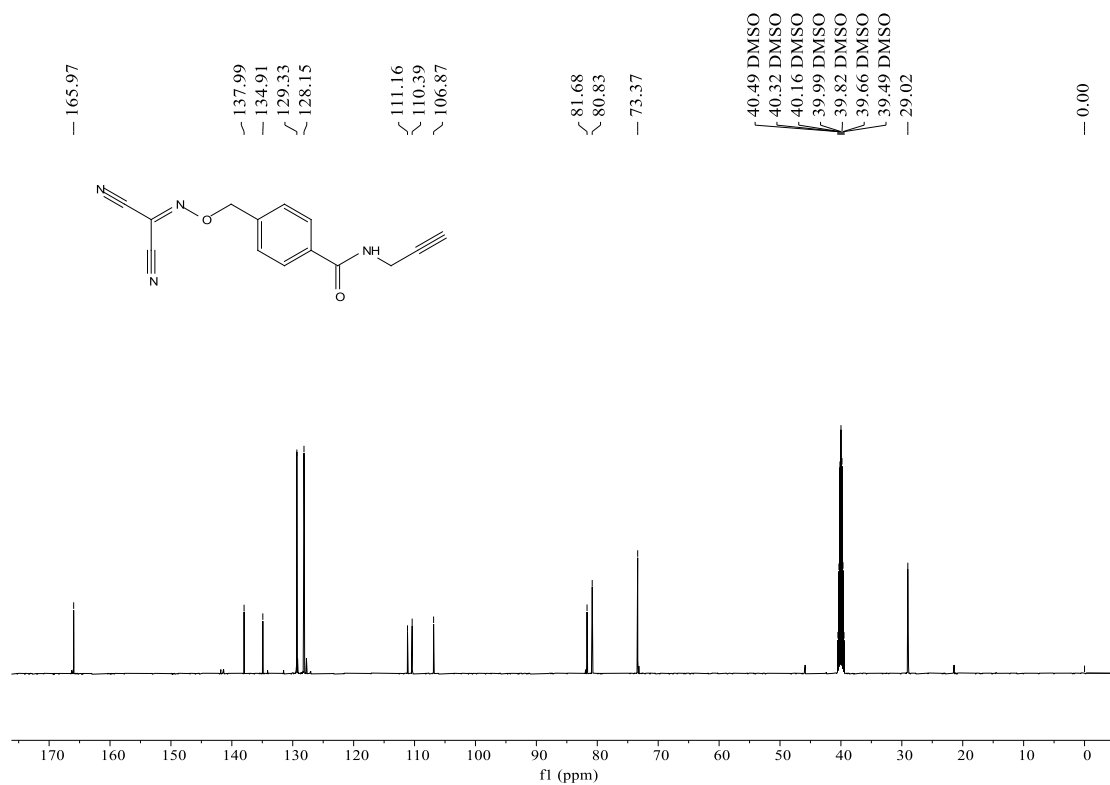

<sup>13</sup>C NMR for compound d



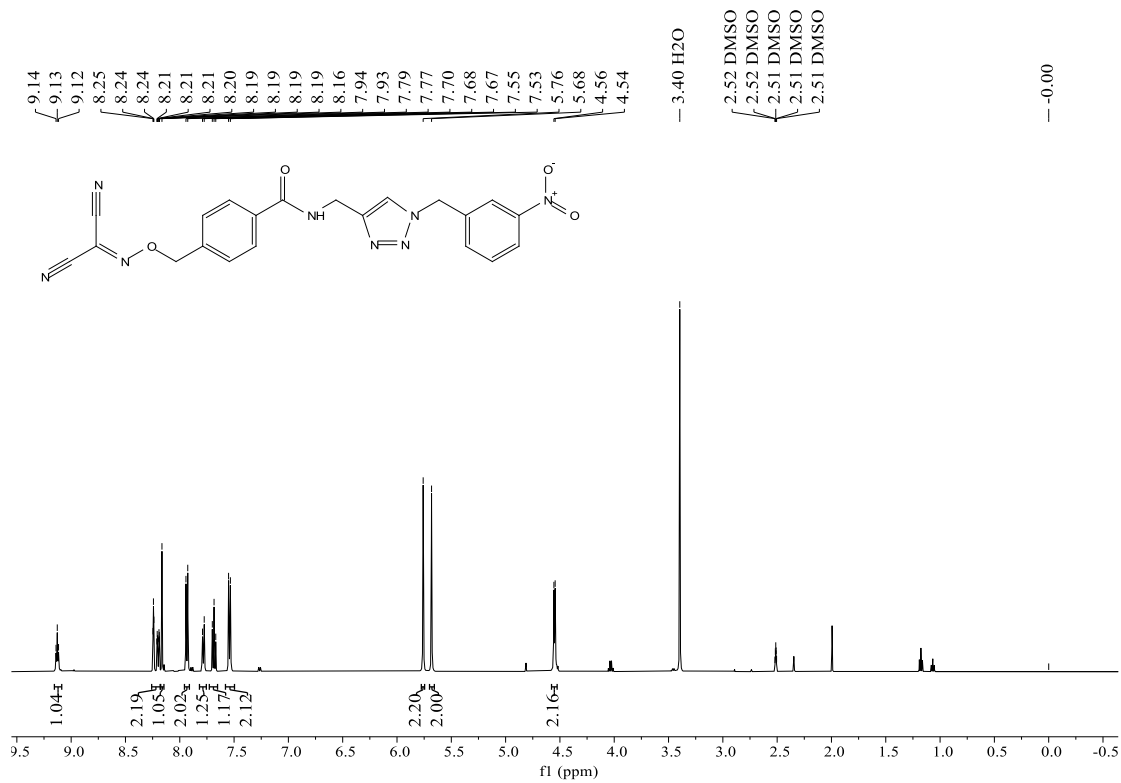

<sup>1</sup>H NMR for compound E1

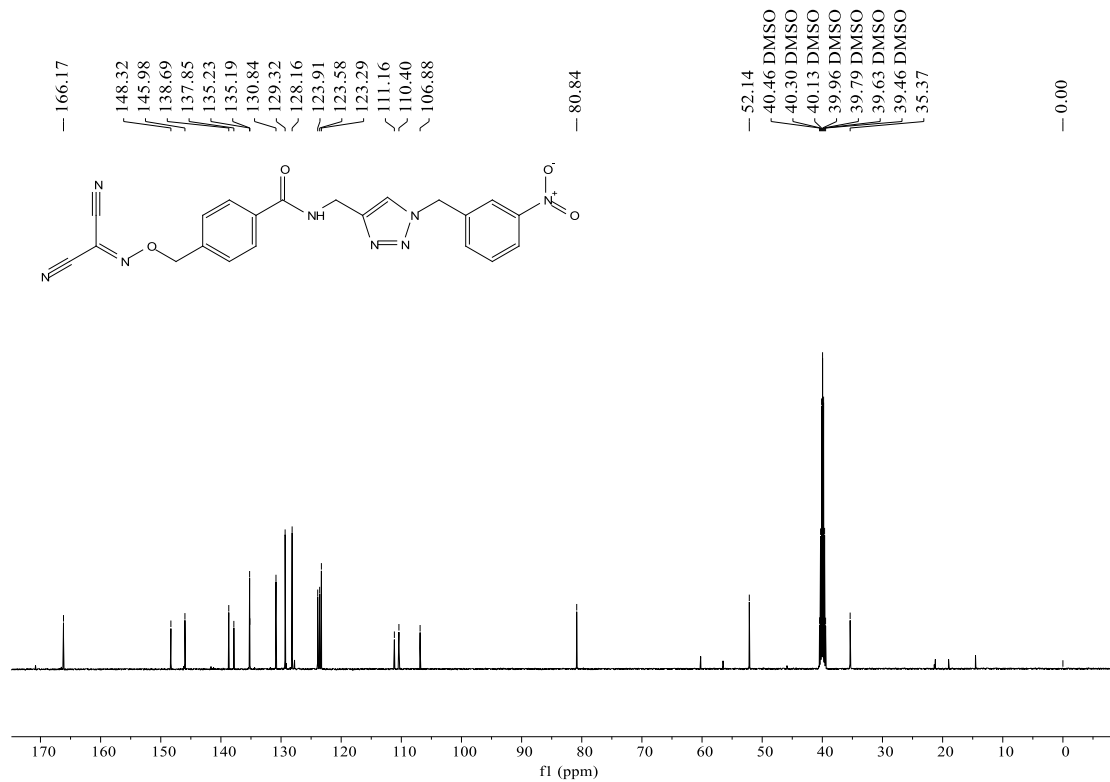

<sup>13</sup>C NMR for compound E1

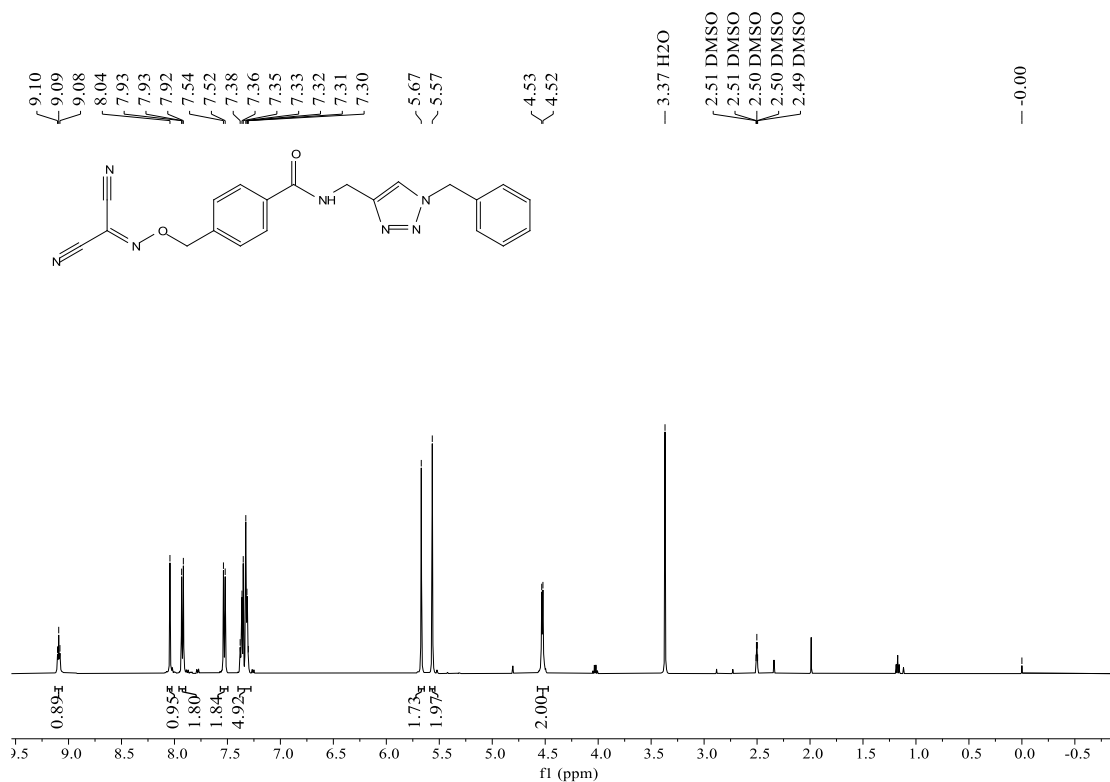

<sup>1</sup>H NMR for compound E2

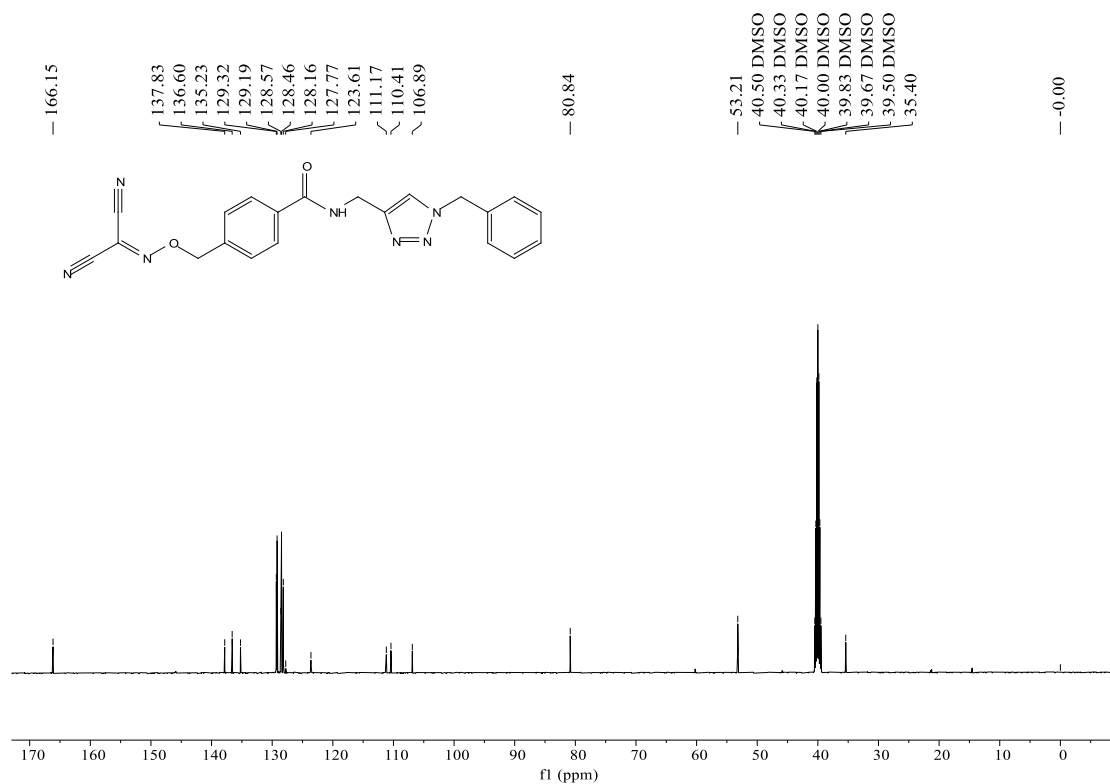

<sup>13</sup>C NMR for compound E2

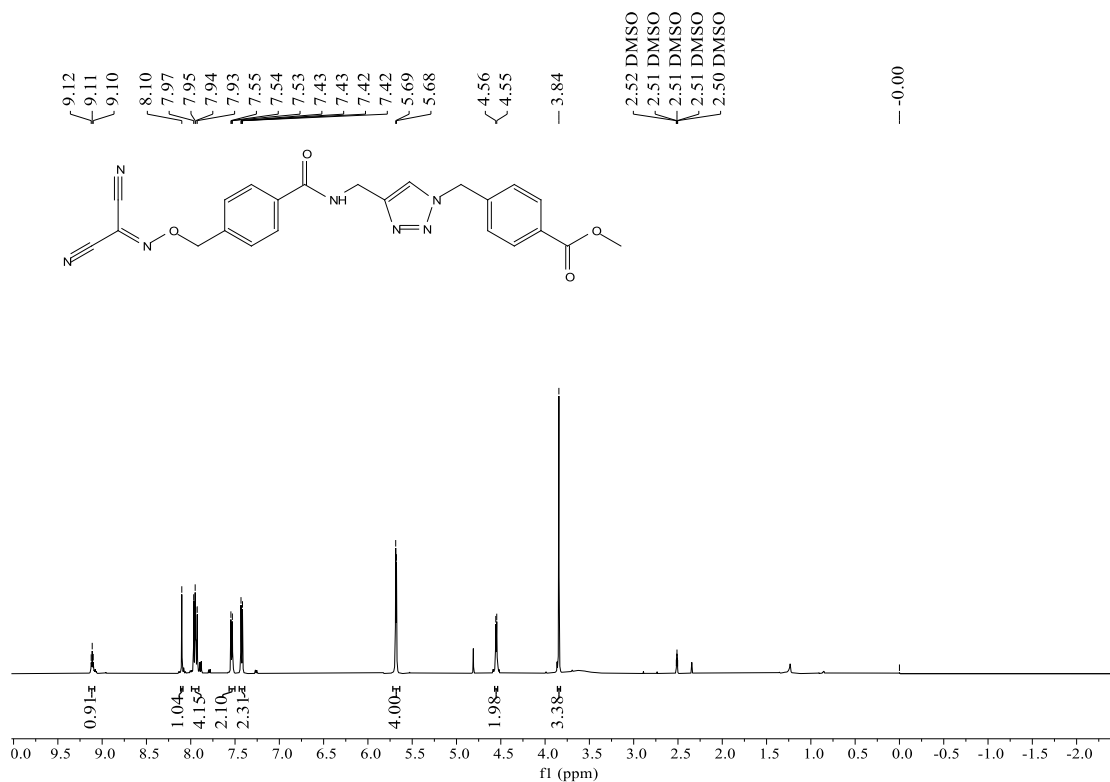

**<sup>1</sup>H NMR for compound E3**

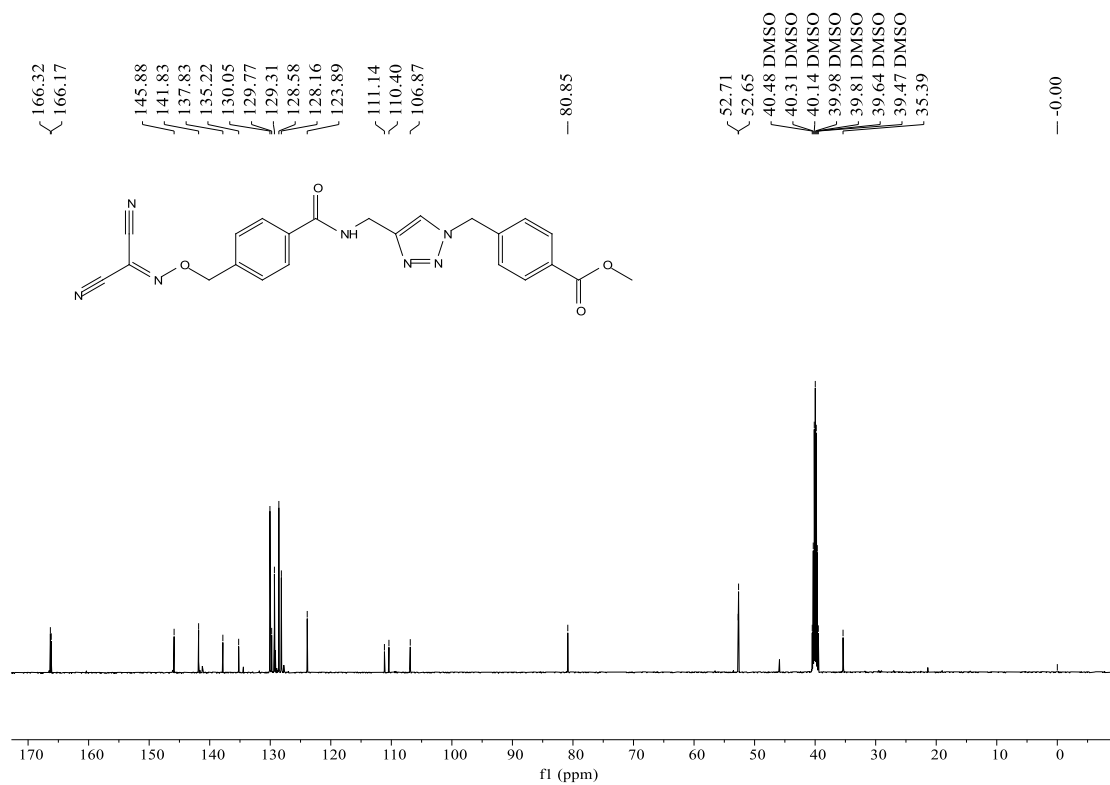

**<sup>13</sup>C NMR for compound E3**

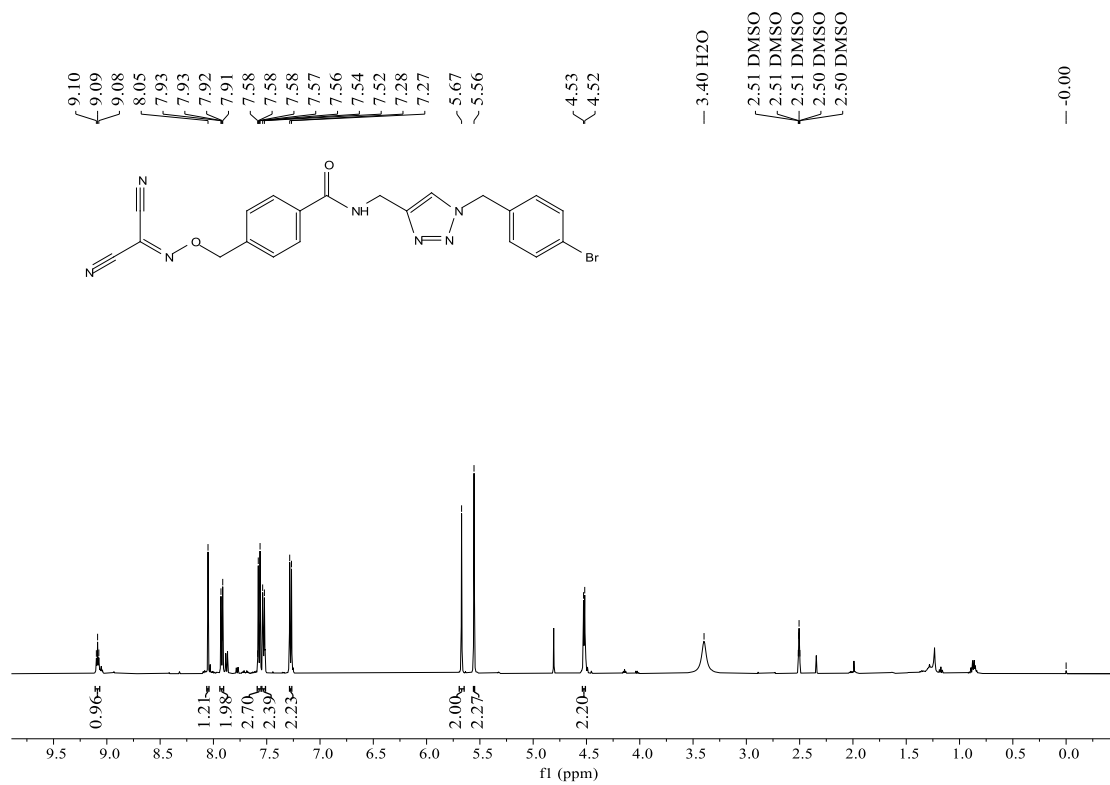

<sup>1</sup>H NMR for compound E4

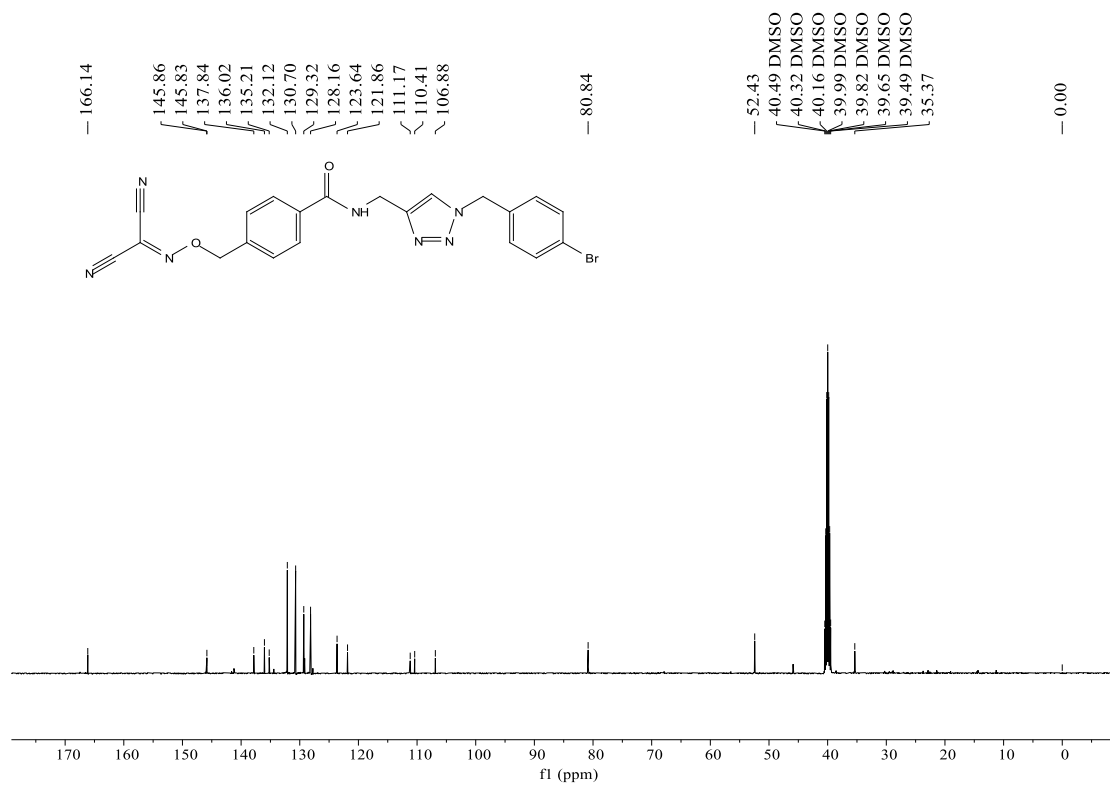

<sup>13</sup>C NMR for compound E4

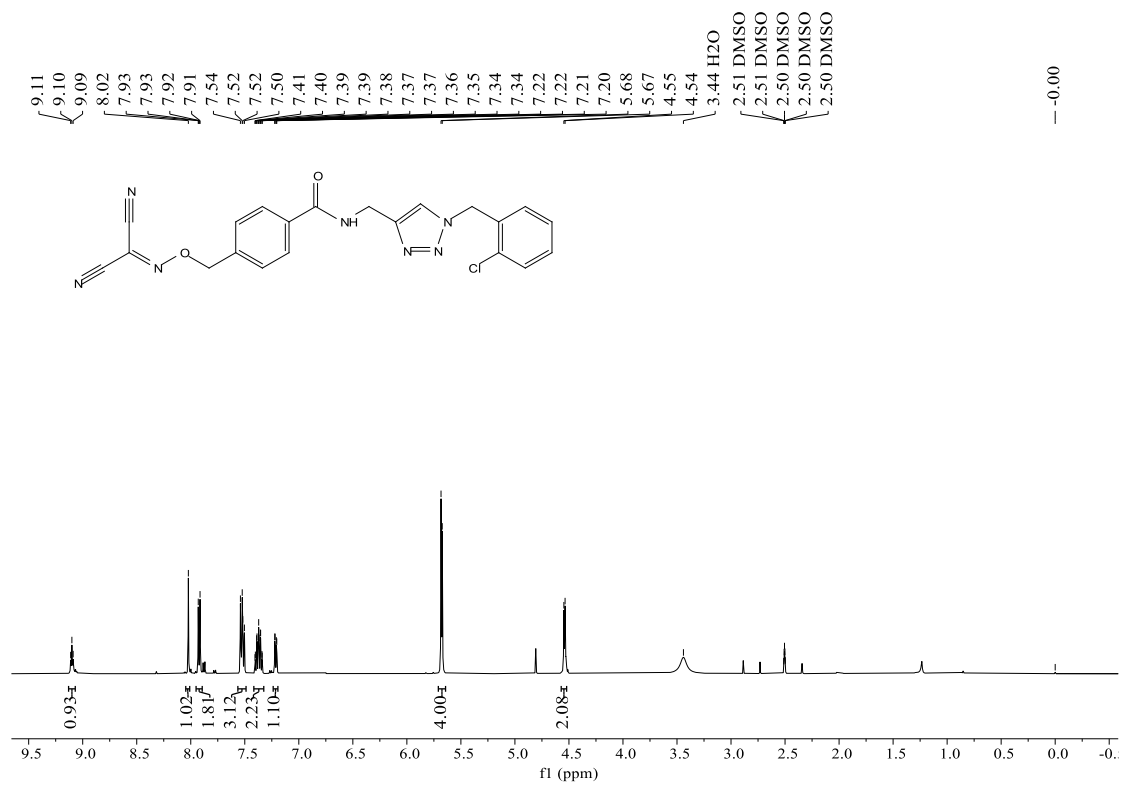

<sup>1</sup>H NMR for compound E5

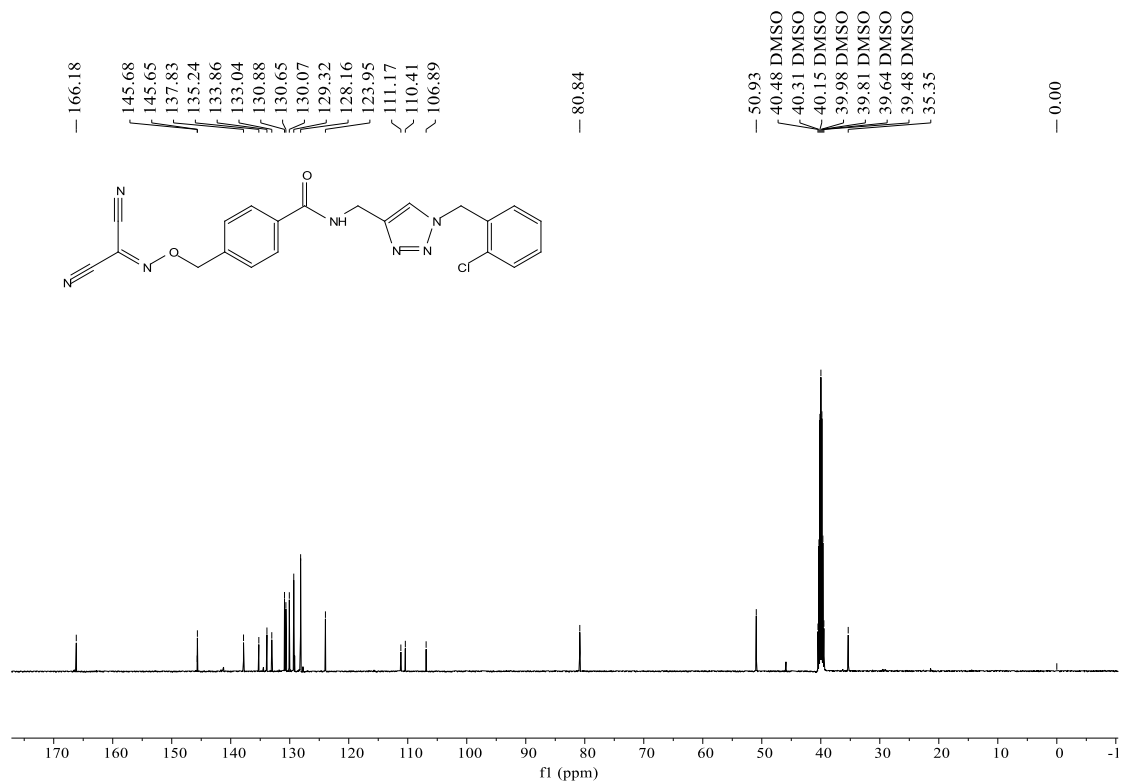

<sup>13</sup>C NMR for compound E5

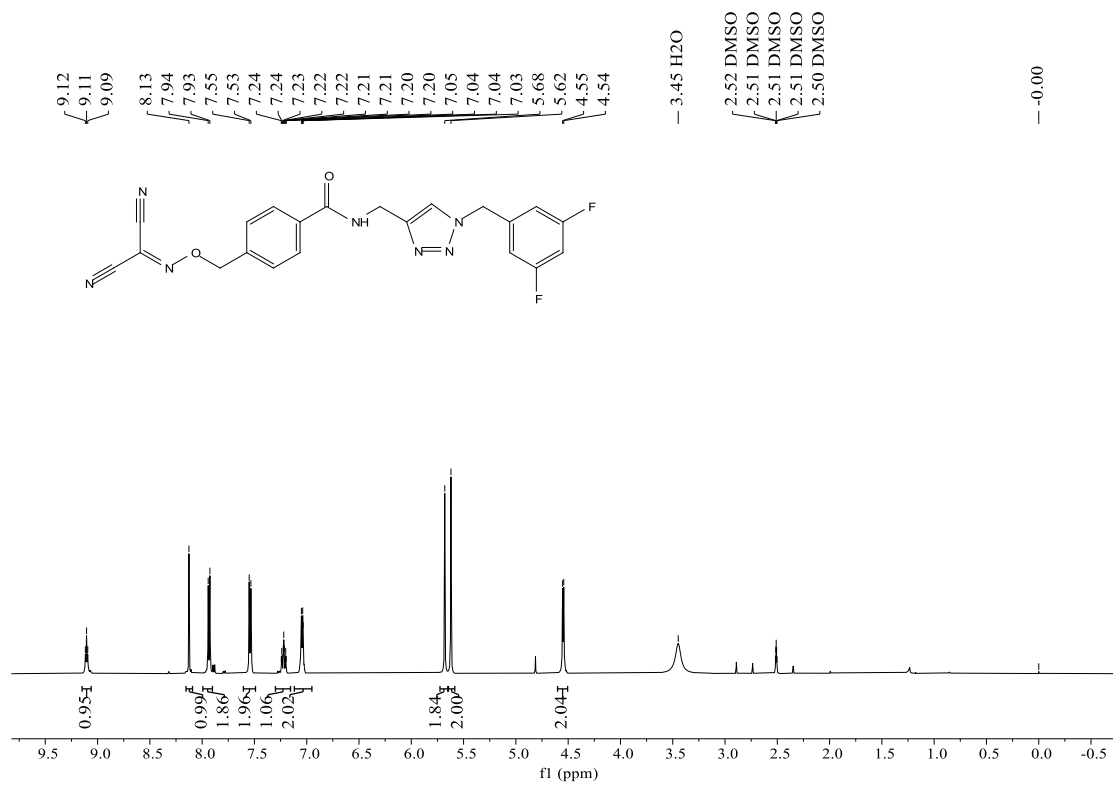

<sup>1</sup>H NMR for compound E6

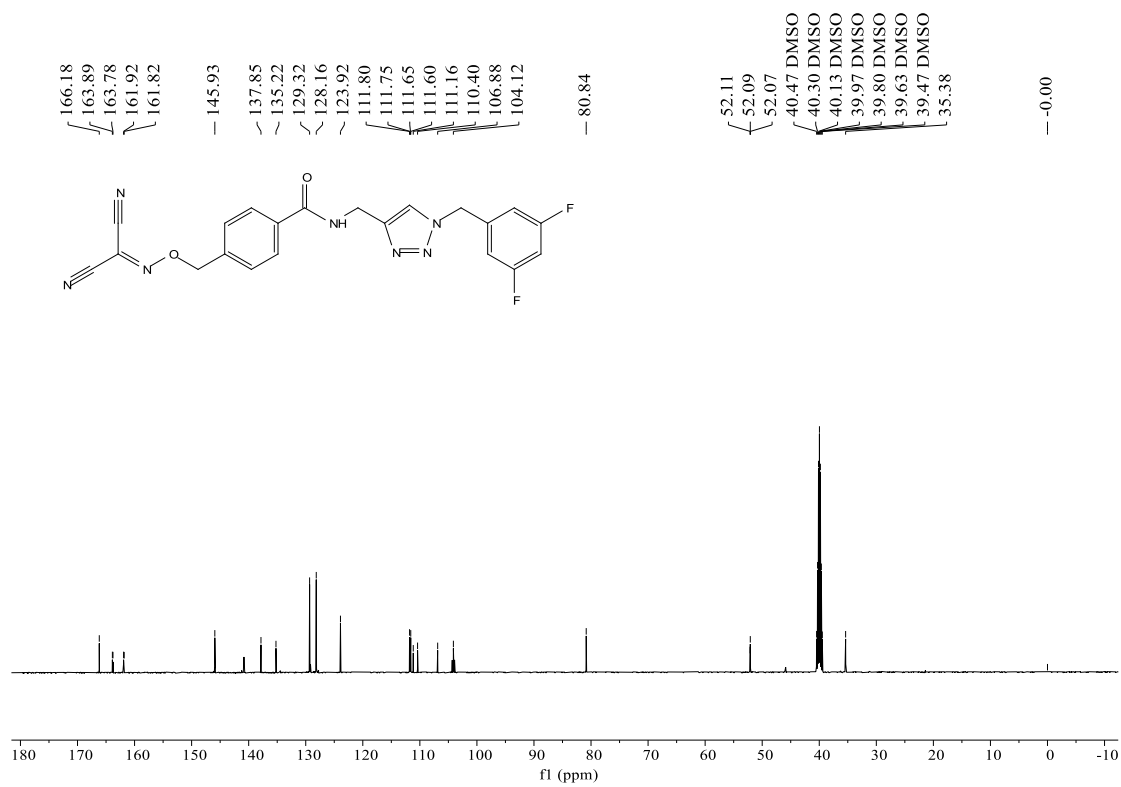

<sup>13</sup>C NMR for compound E6

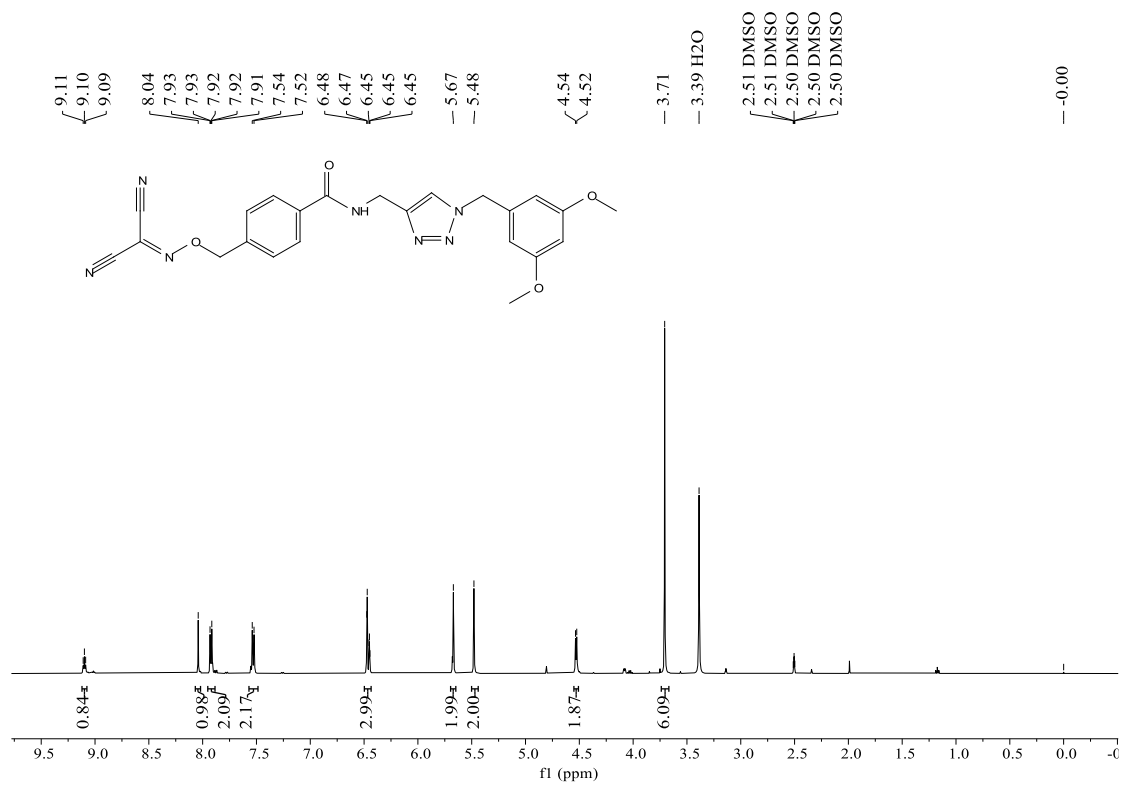

<sup>1</sup>H NMR for compound E7

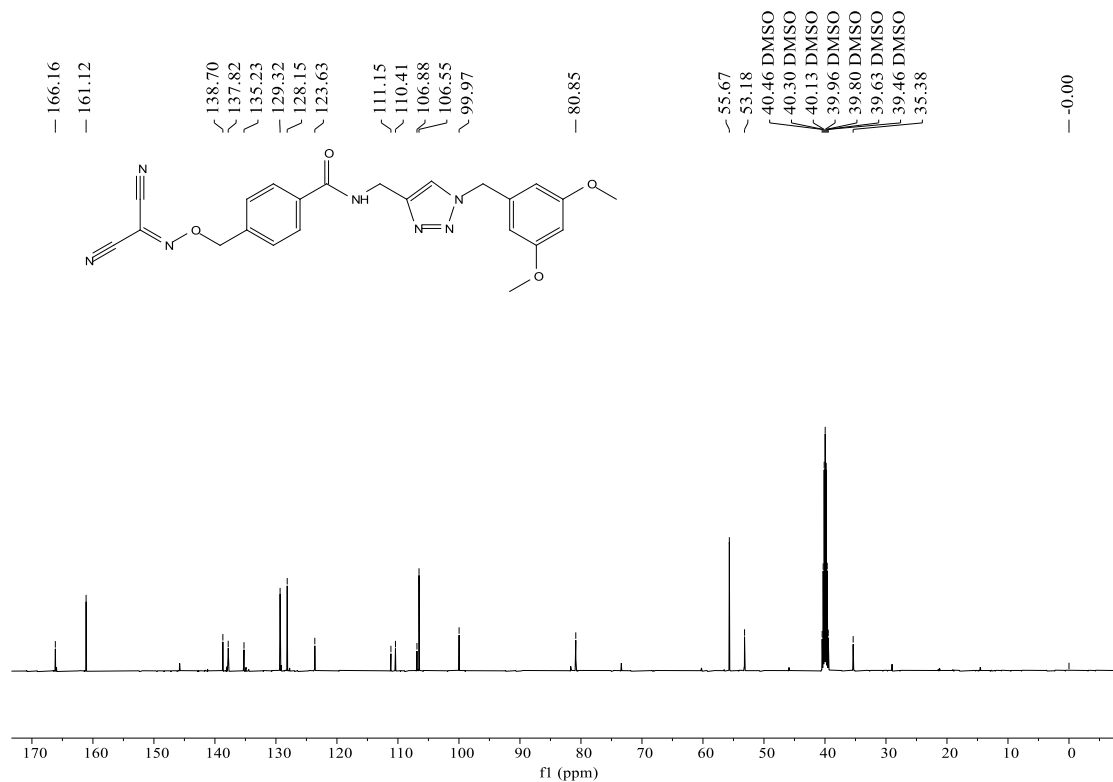

<sup>13</sup>C NMR for compound E7

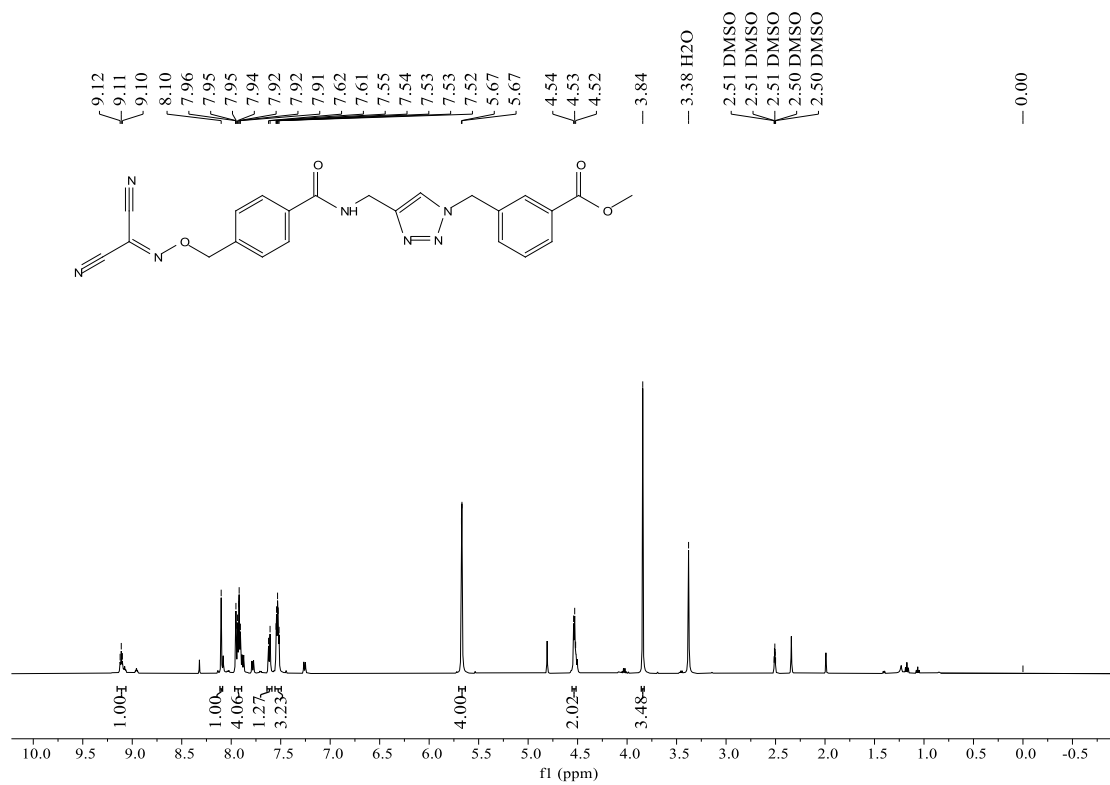

<sup>1</sup>H NMR for compound E8

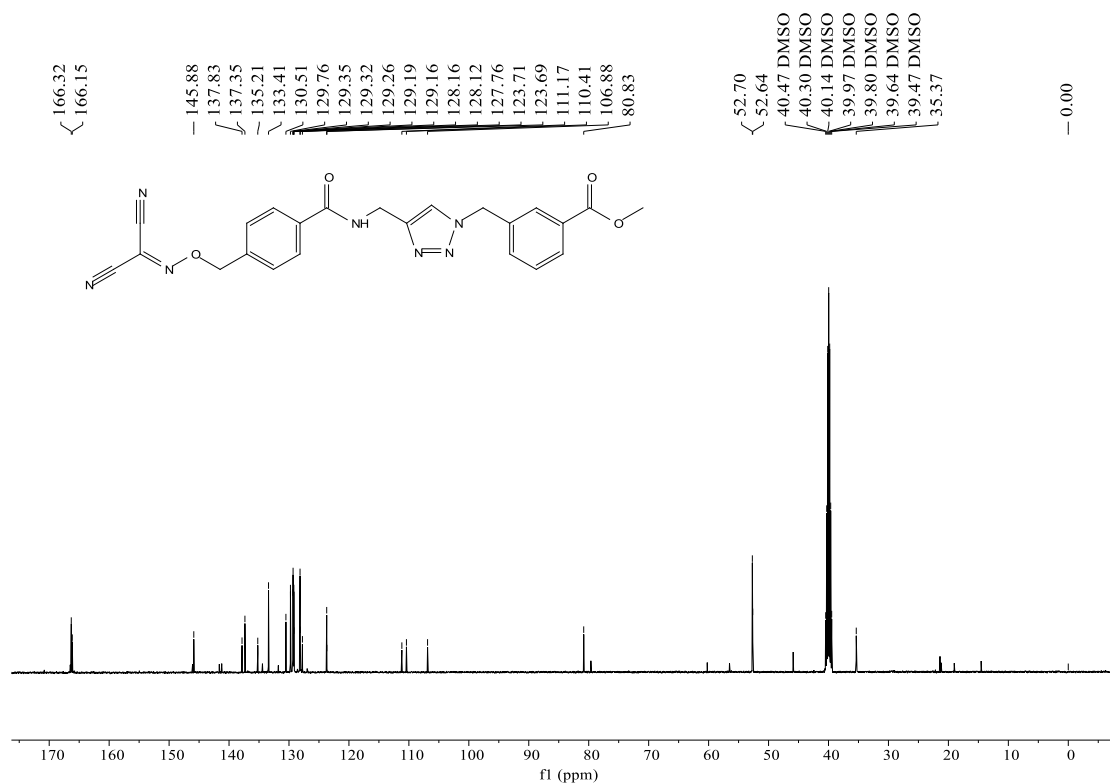

<sup>13</sup>C NMR for compound E8



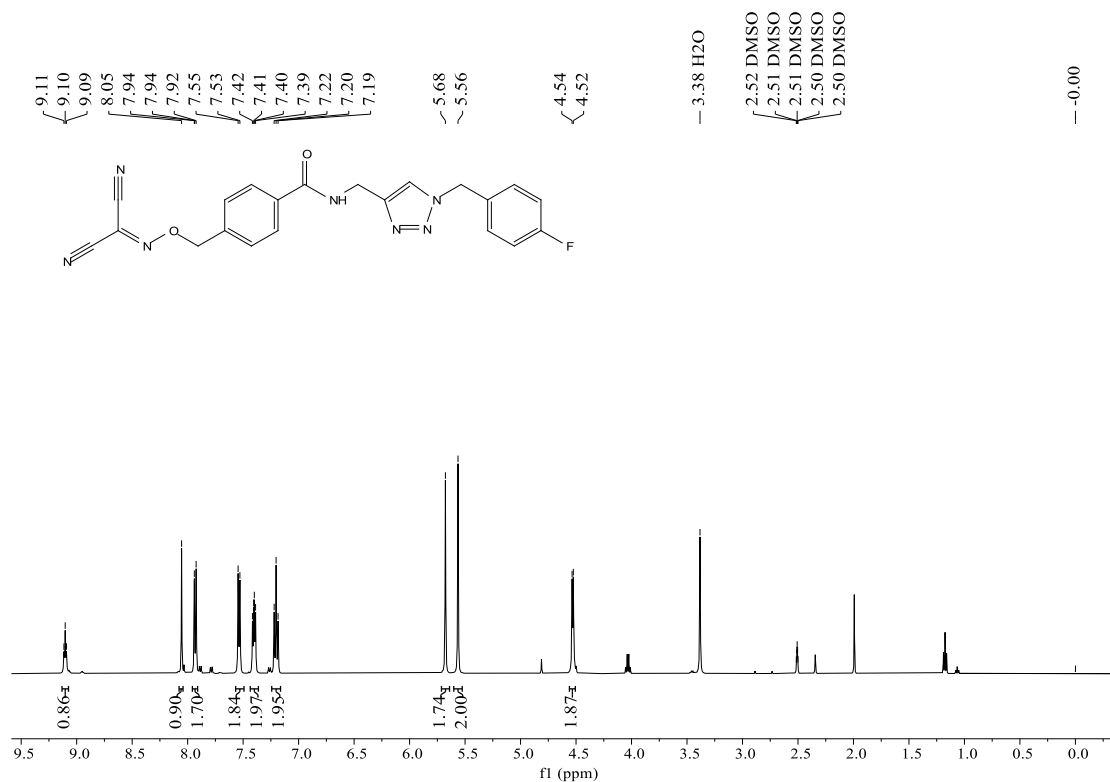

<sup>1</sup>H NMR for compound E9

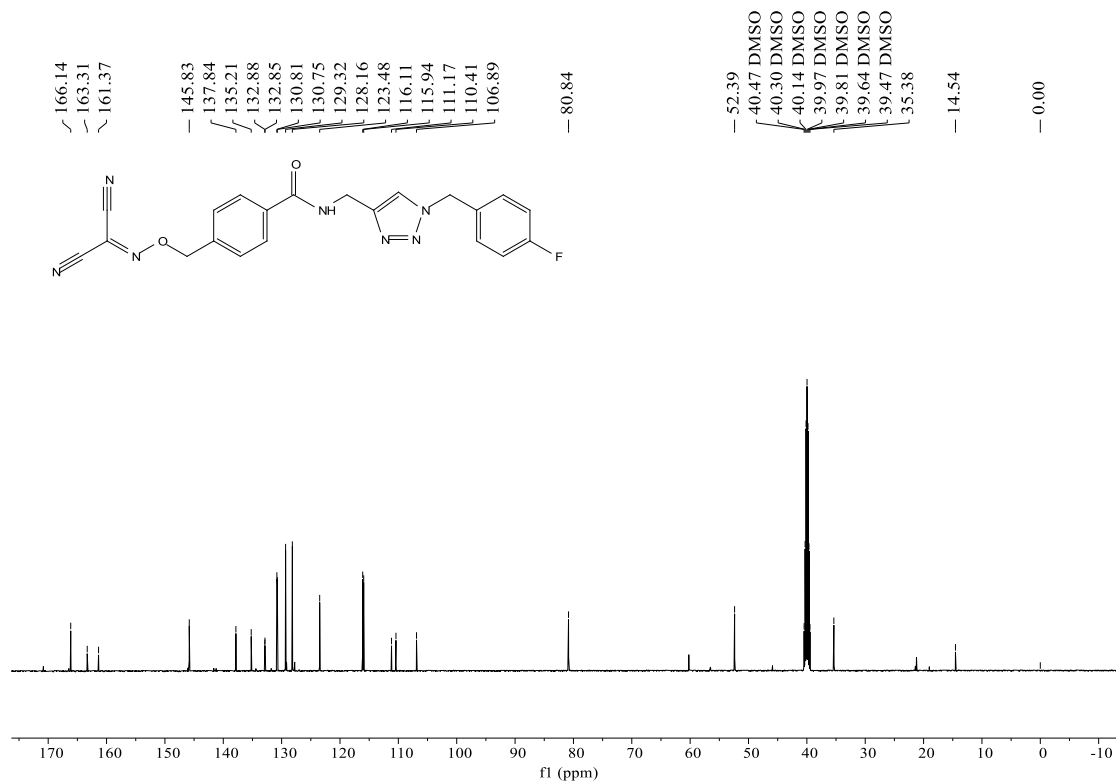

<sup>13</sup>C NMR for compound E9

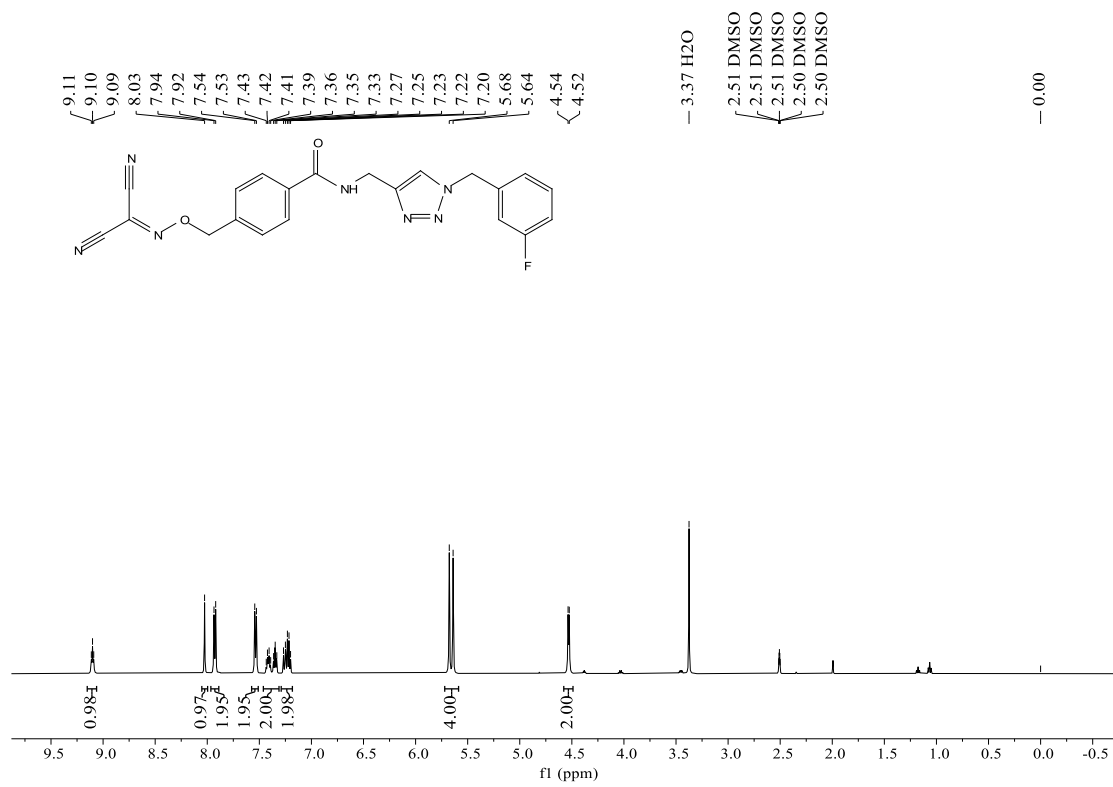

<sup>1</sup>H NMR for compound E10

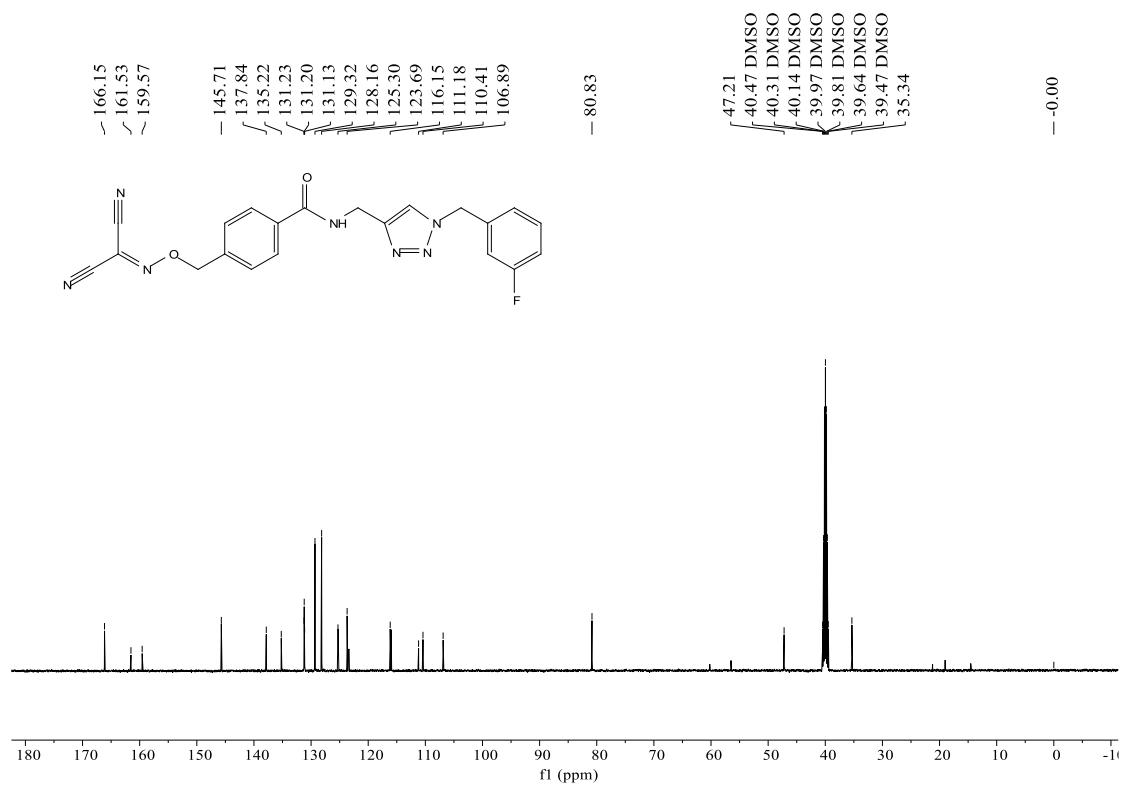

<sup>13</sup>C NMR for compound E10

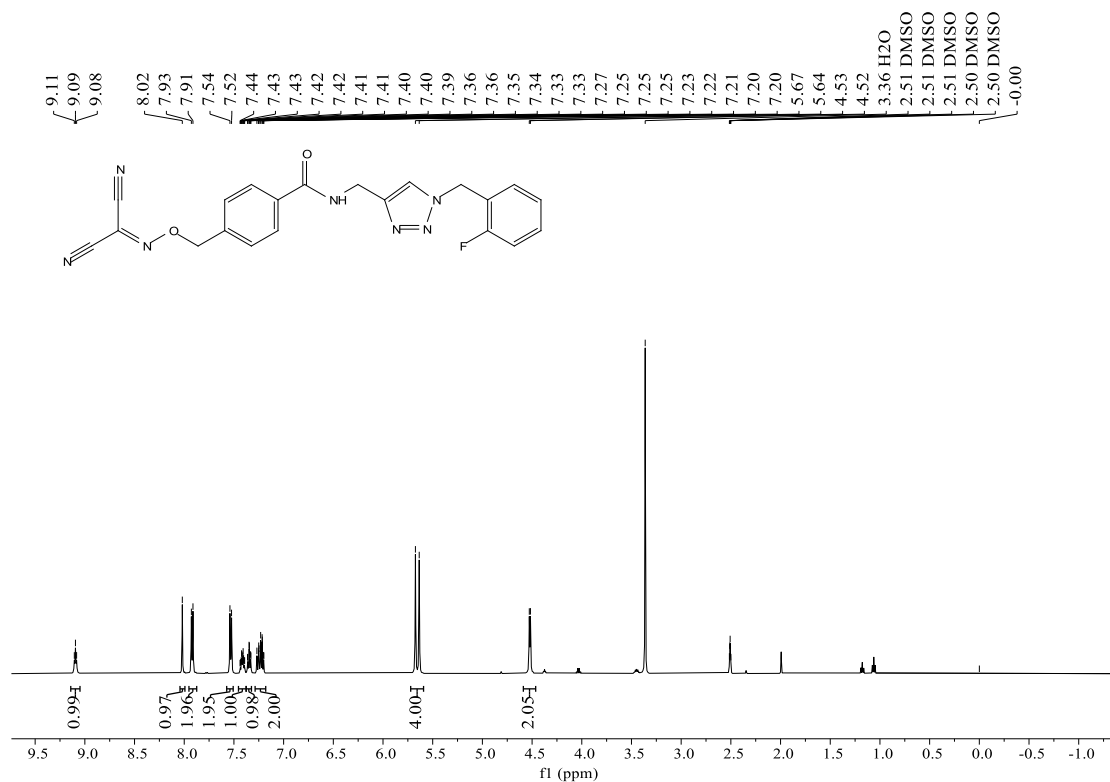

<sup>1</sup>H NMR for compound E11

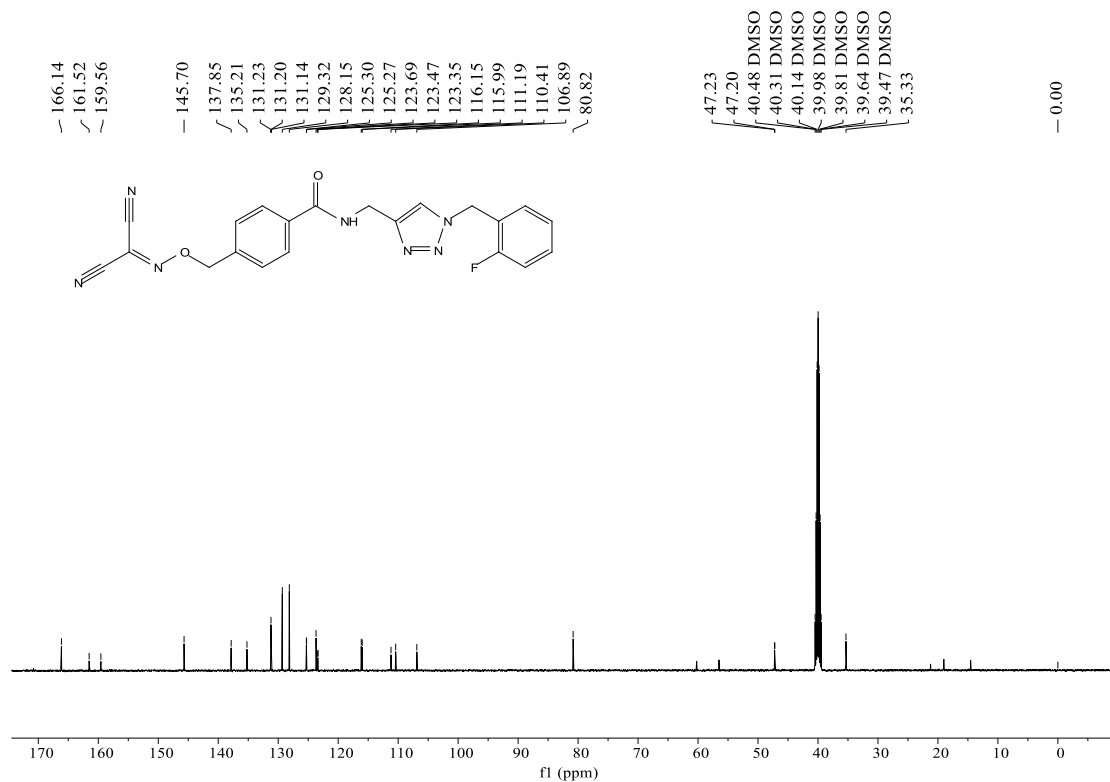

<sup>13</sup>C NMR for compound E11

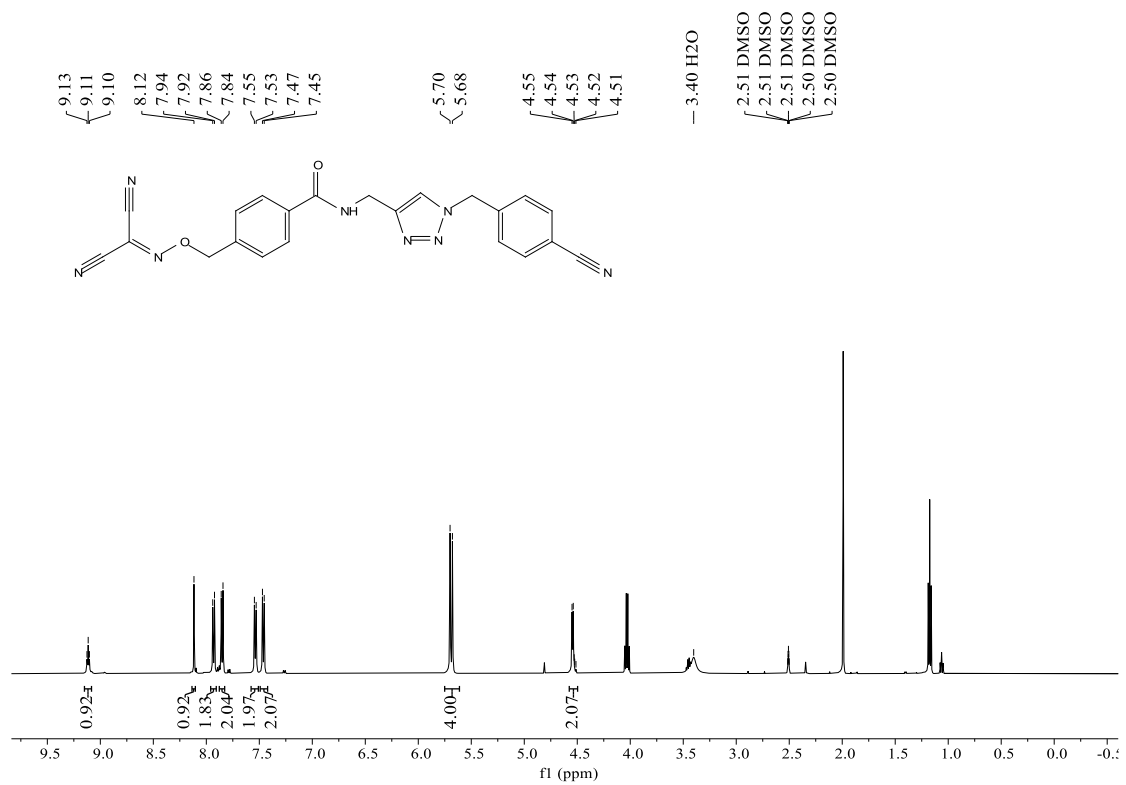

<sup>1</sup>H NMR for compound E12

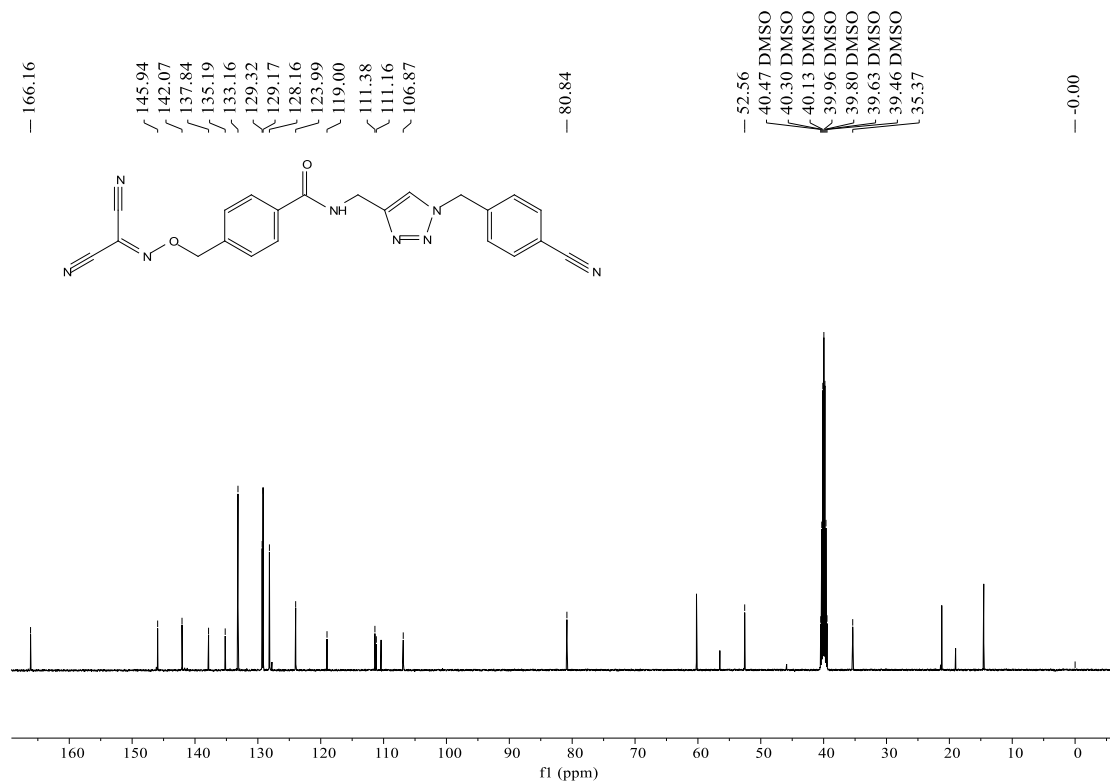

<sup>13</sup>C NMR for compound E12

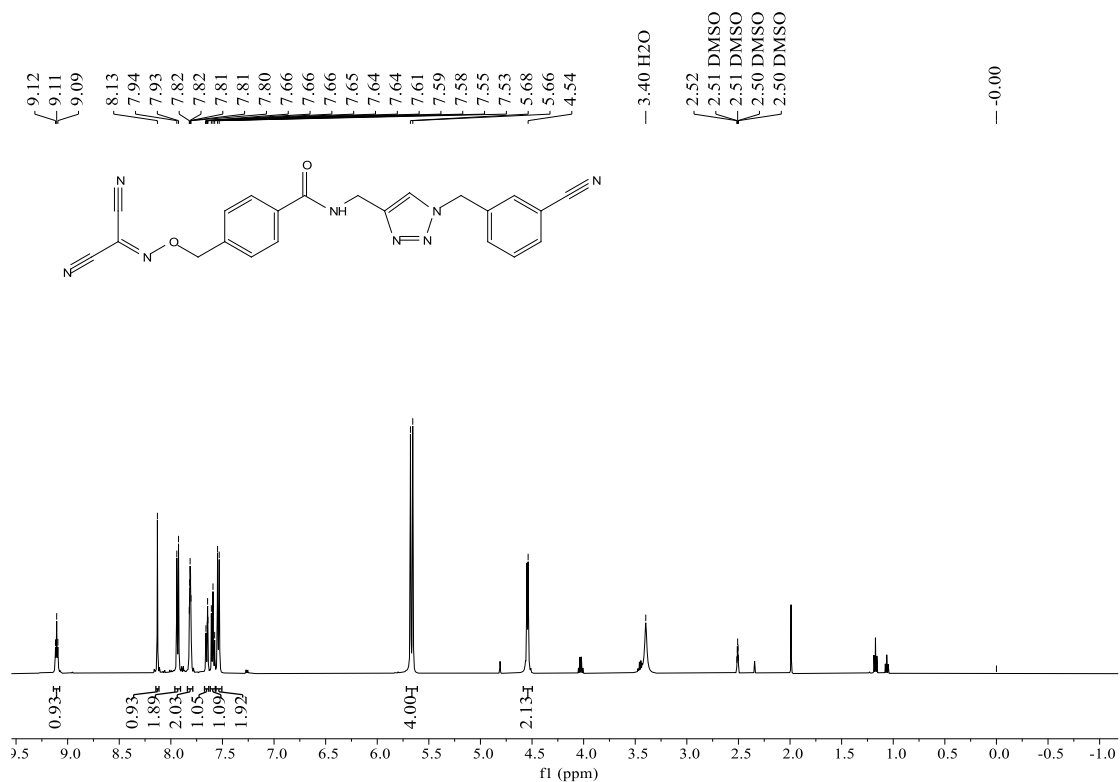

<sup>1</sup>H NMR for compound E13

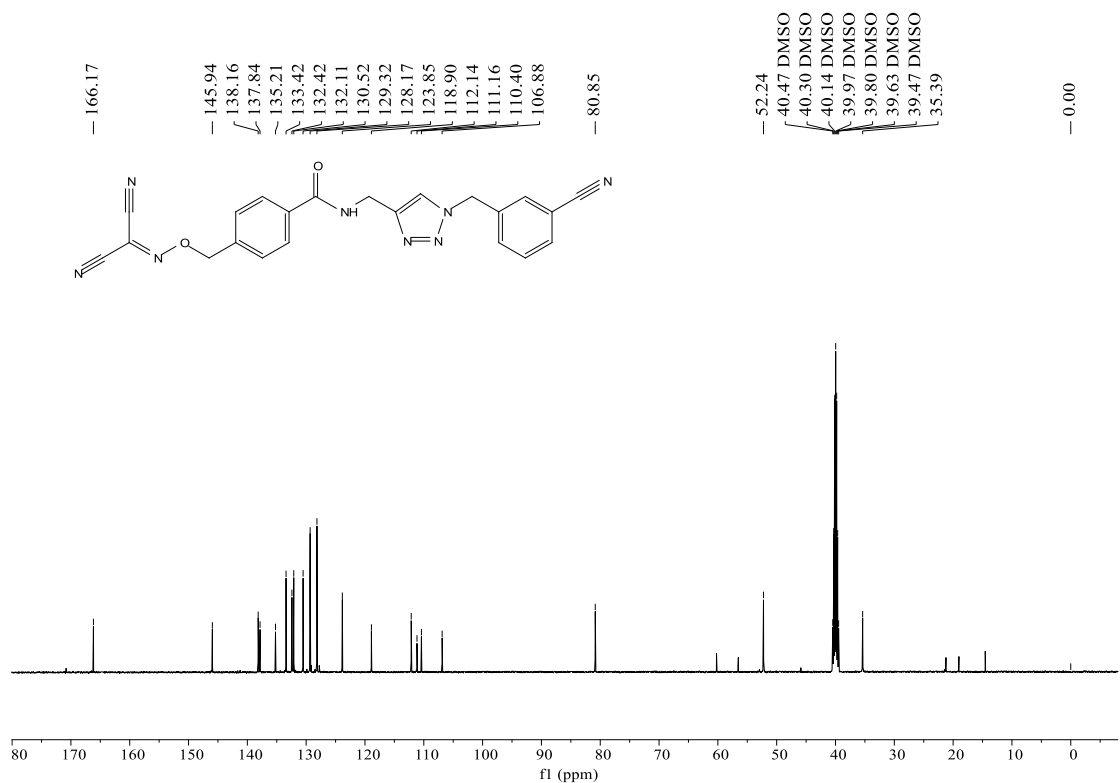

<sup>13</sup>C NMR for compound E13

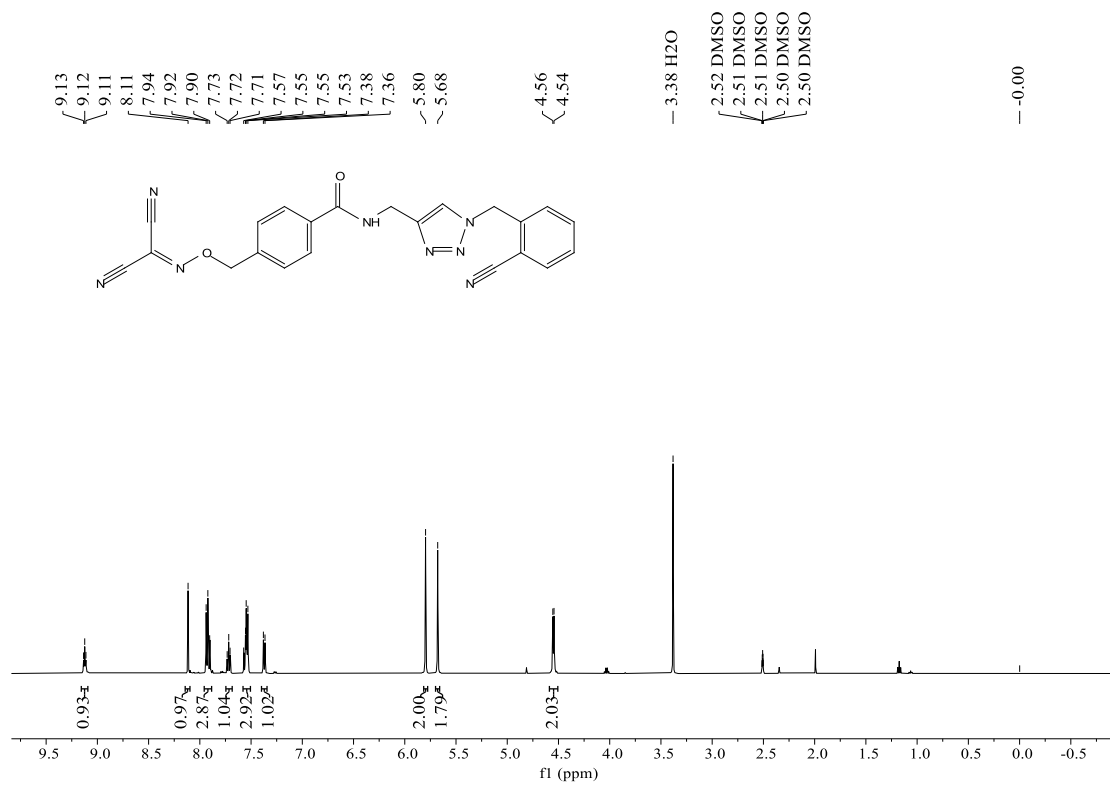

<sup>1</sup>H NMR for compound E14

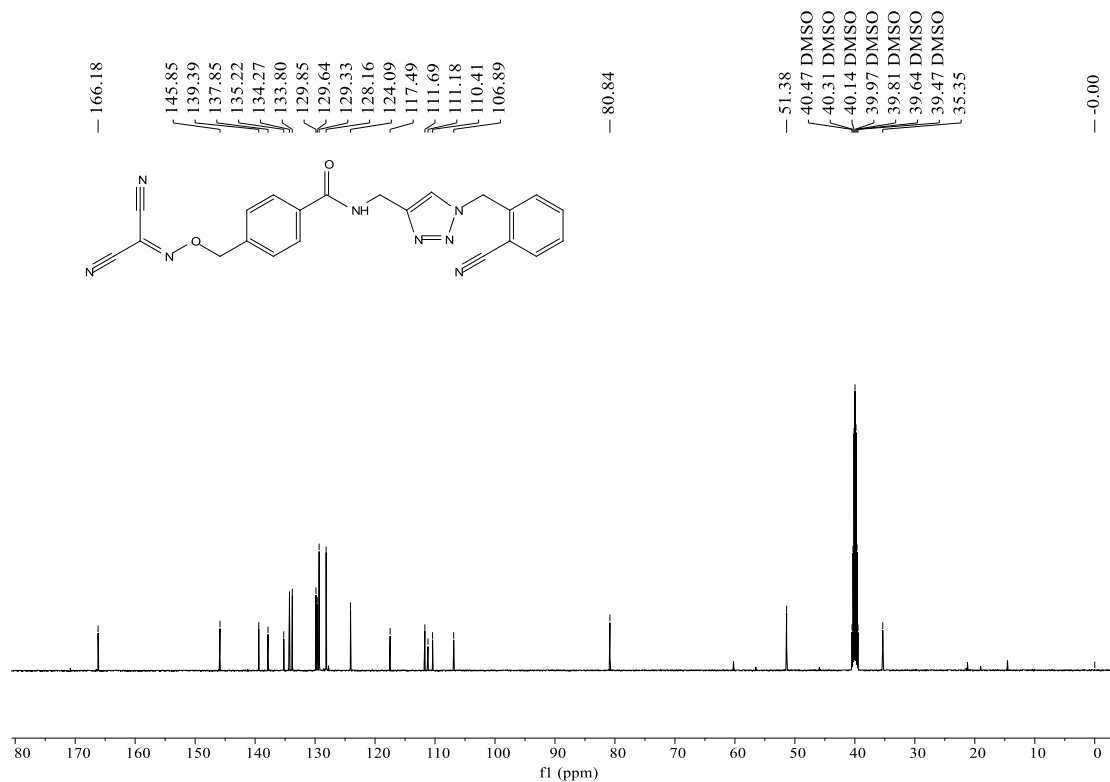

<sup>13</sup>C NMR for compound E14

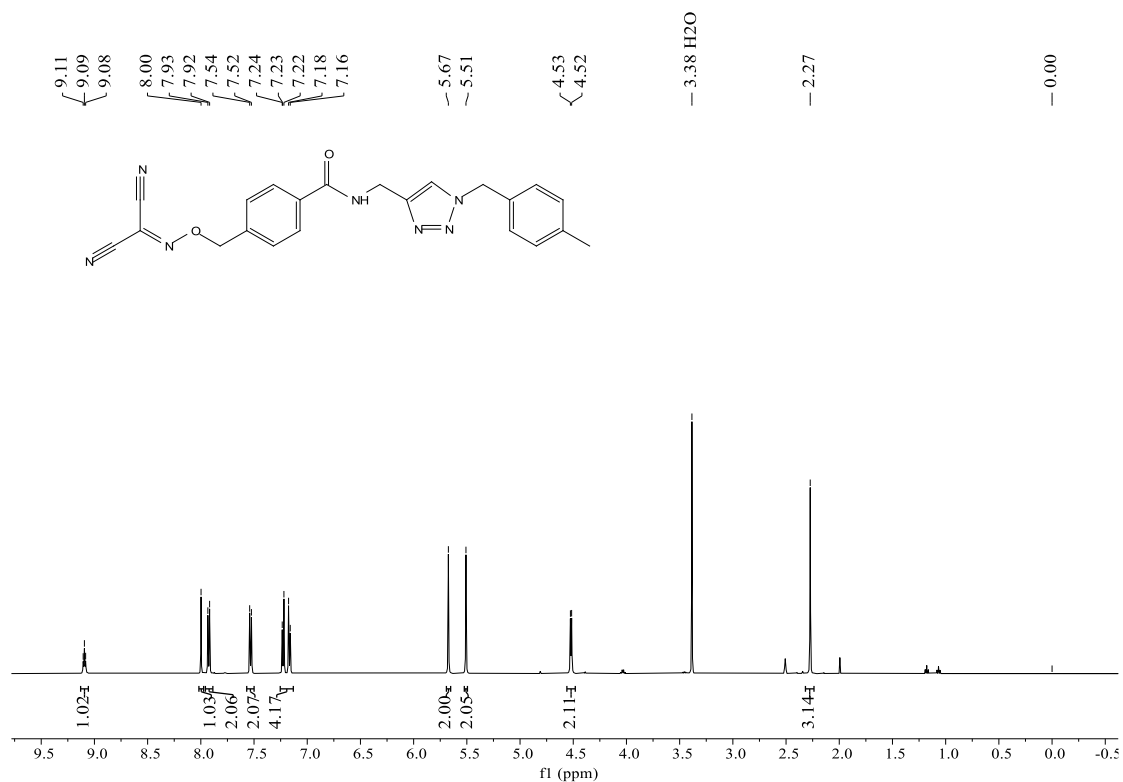

<sup>1</sup>H NMR for compound E15

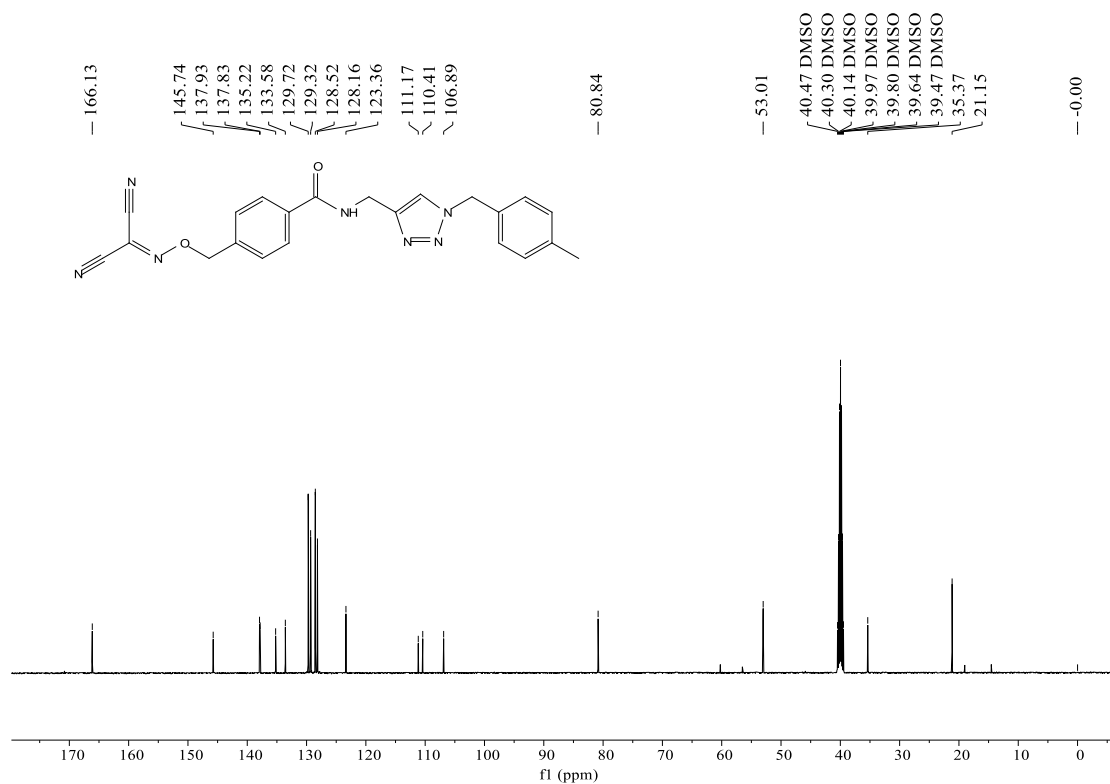

<sup>13</sup>C NMR for compound E15

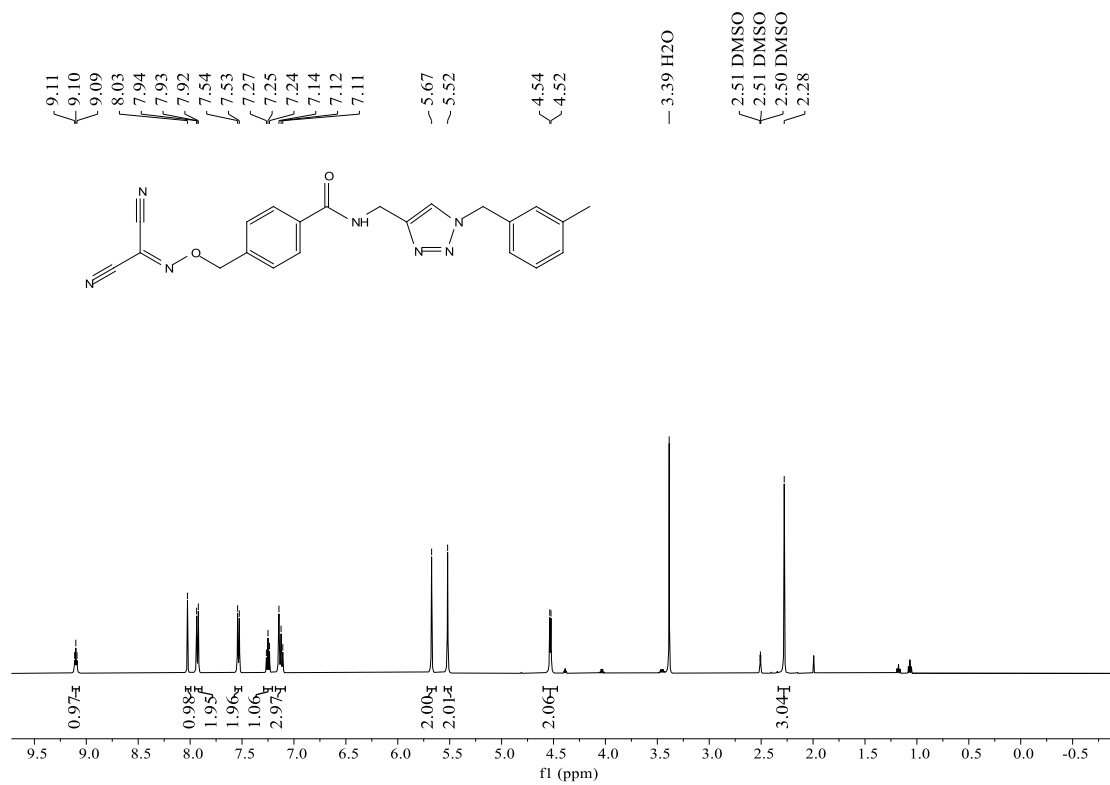

<sup>1</sup>H NMR for compound E16

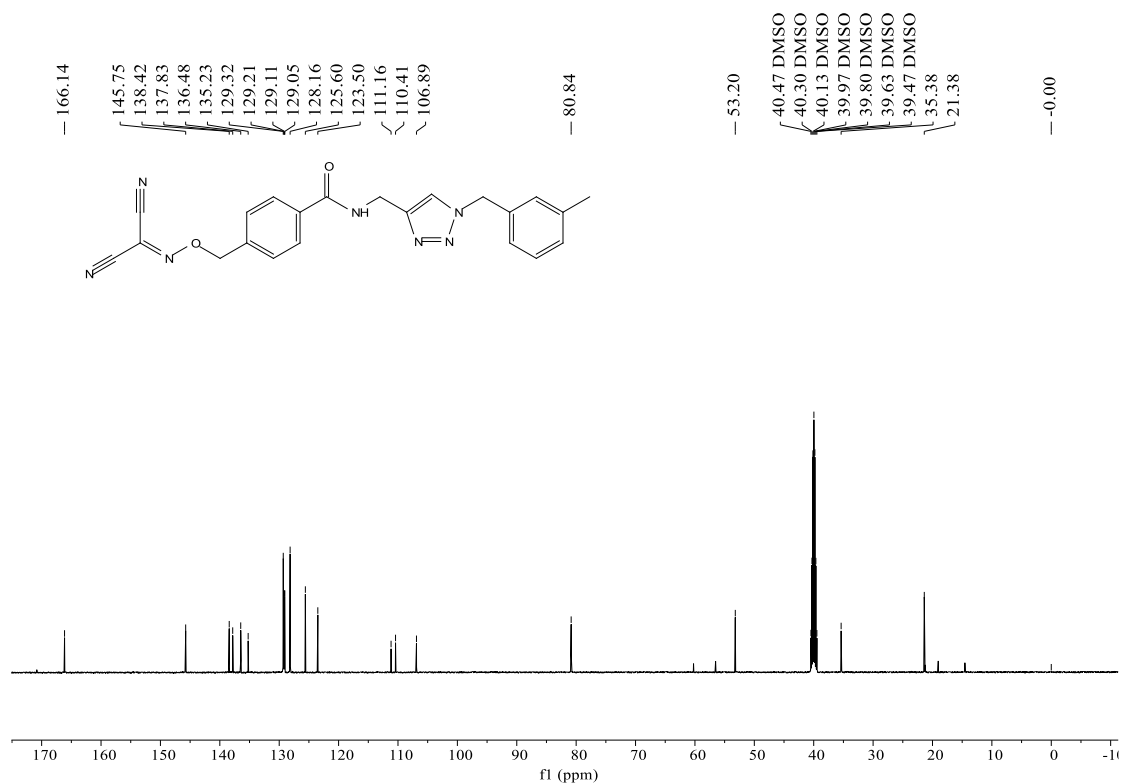

<sup>13</sup>C NMR for compound E16



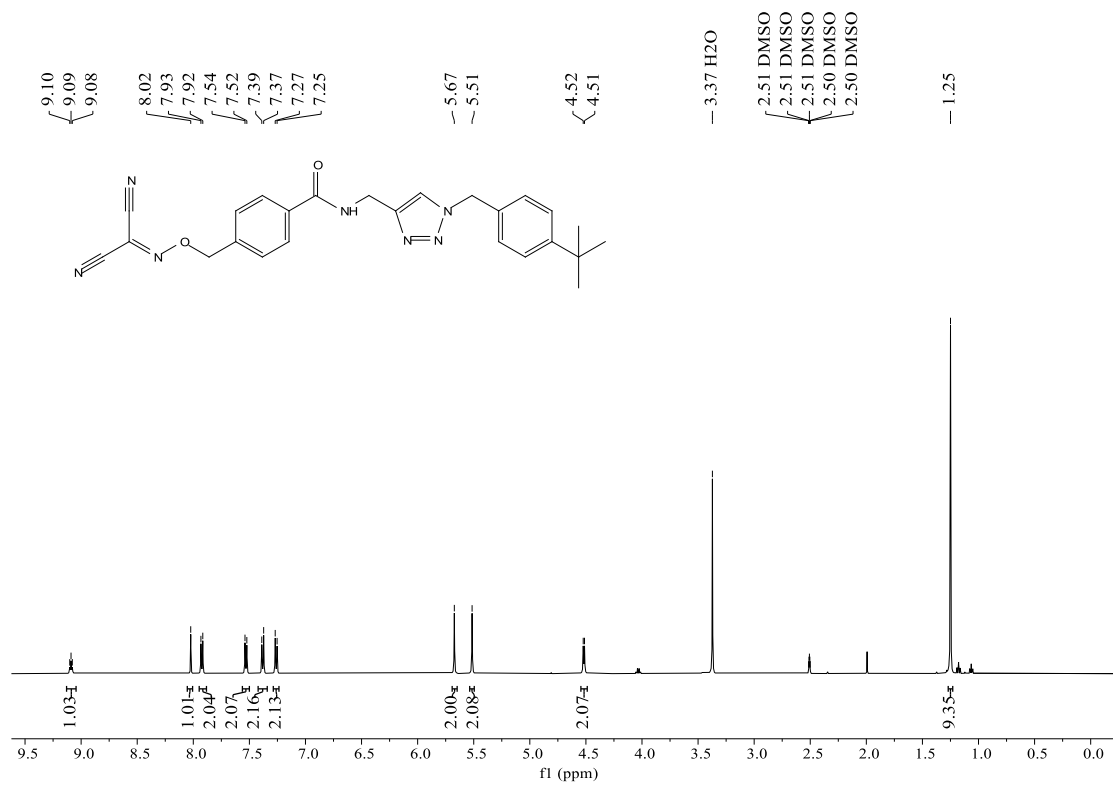

<sup>1</sup>H NMR for compound E17

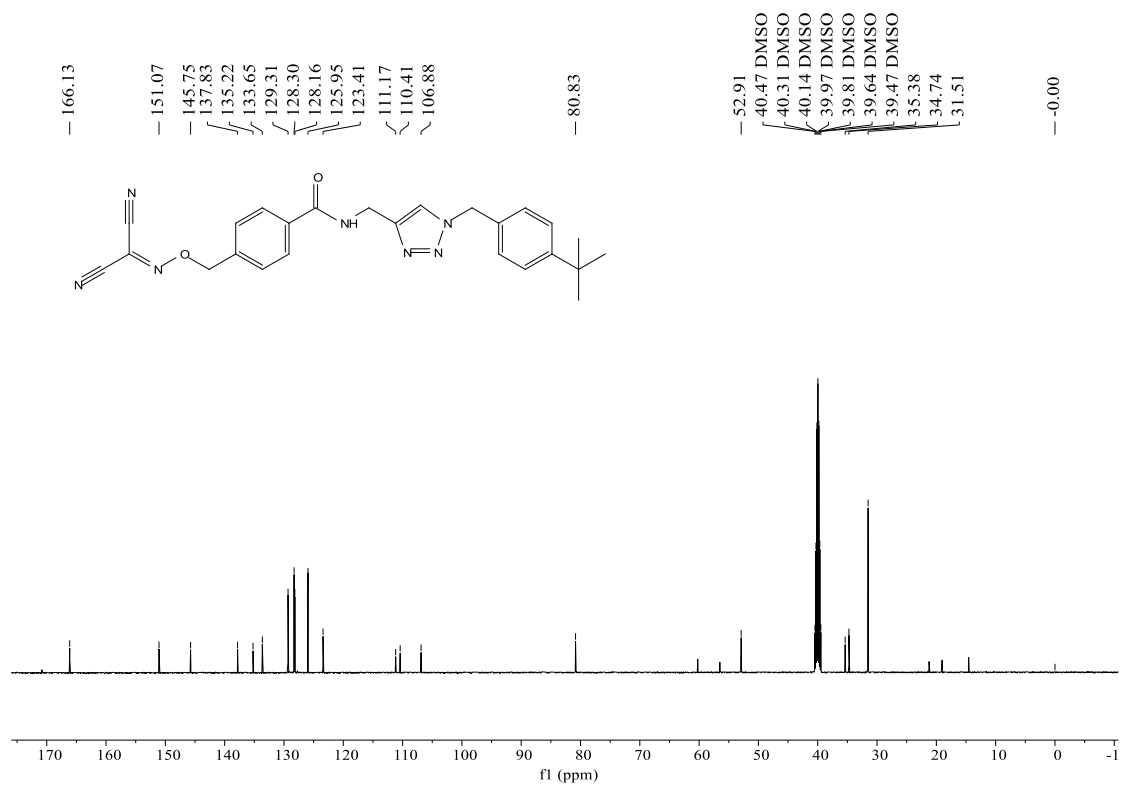

<sup>13</sup>C NMR for compound E17

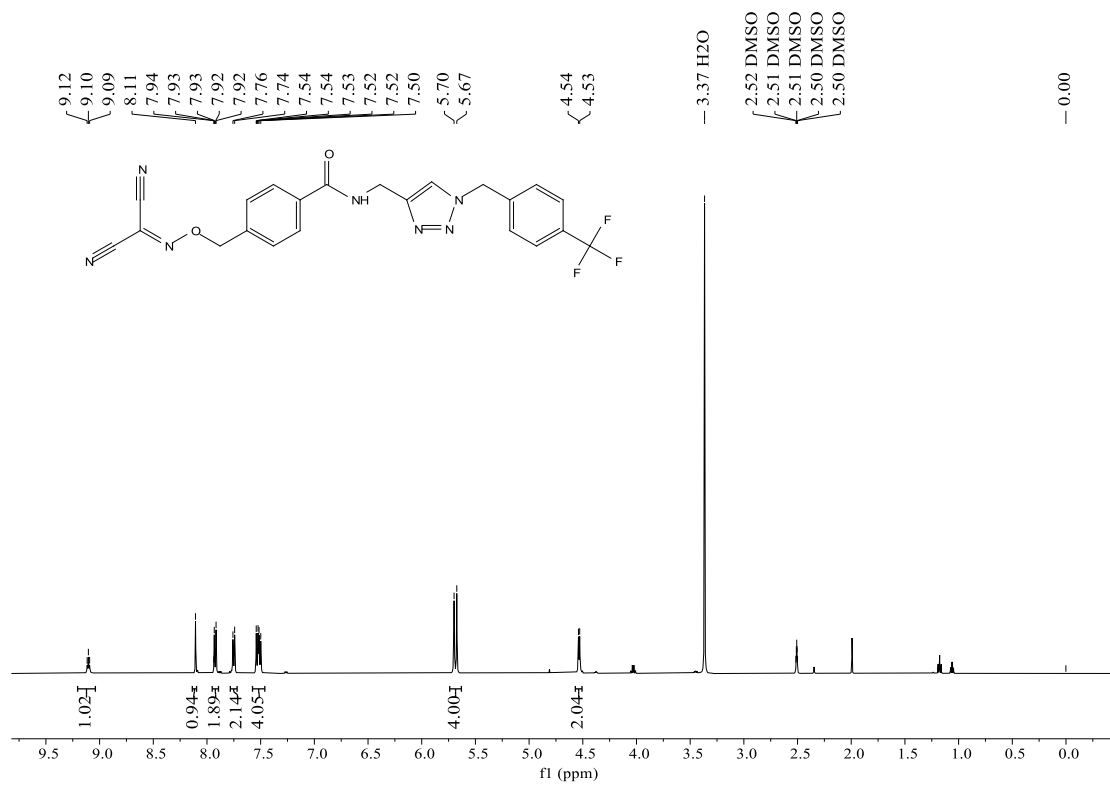

<sup>1</sup>H NMR for compound E18

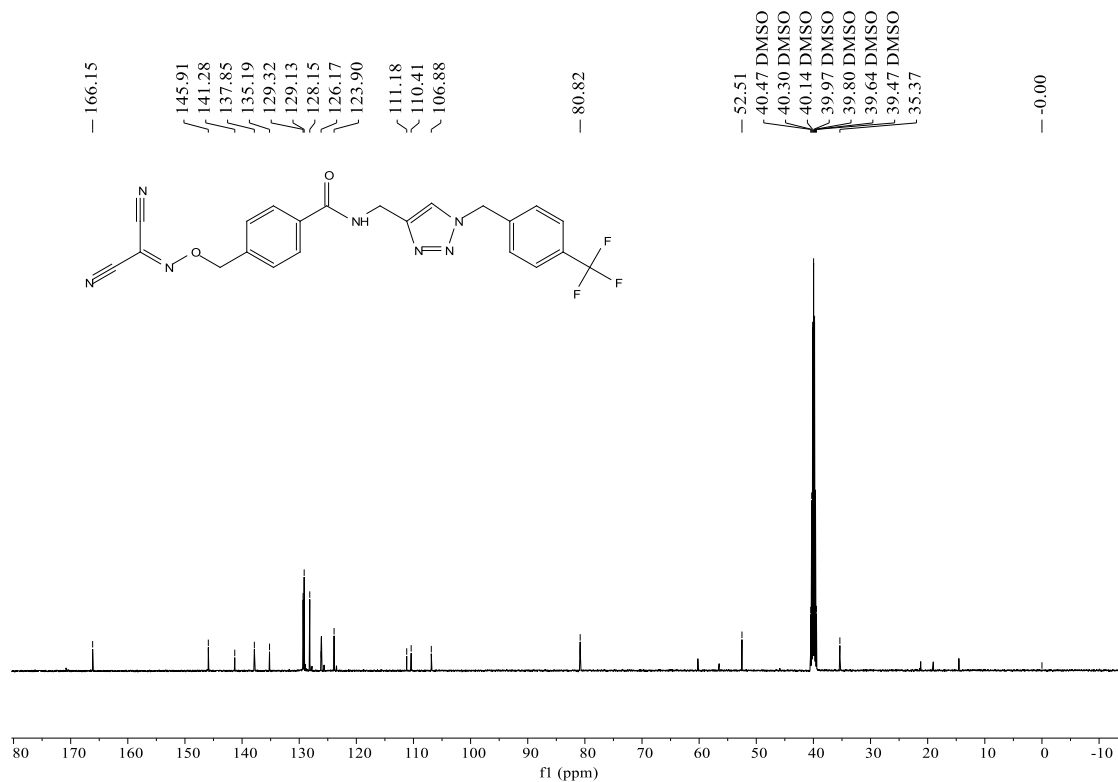

<sup>13</sup>C NMR for compound E18

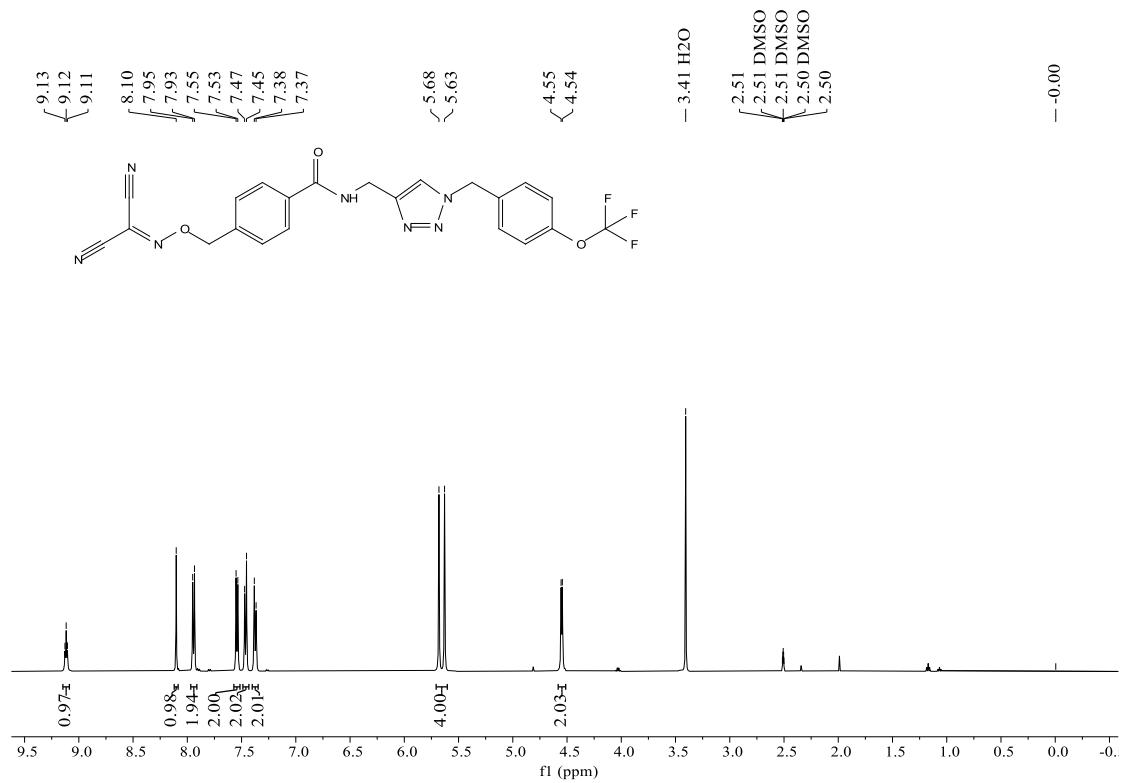

**<sup>1</sup>H NMR for compound E19**

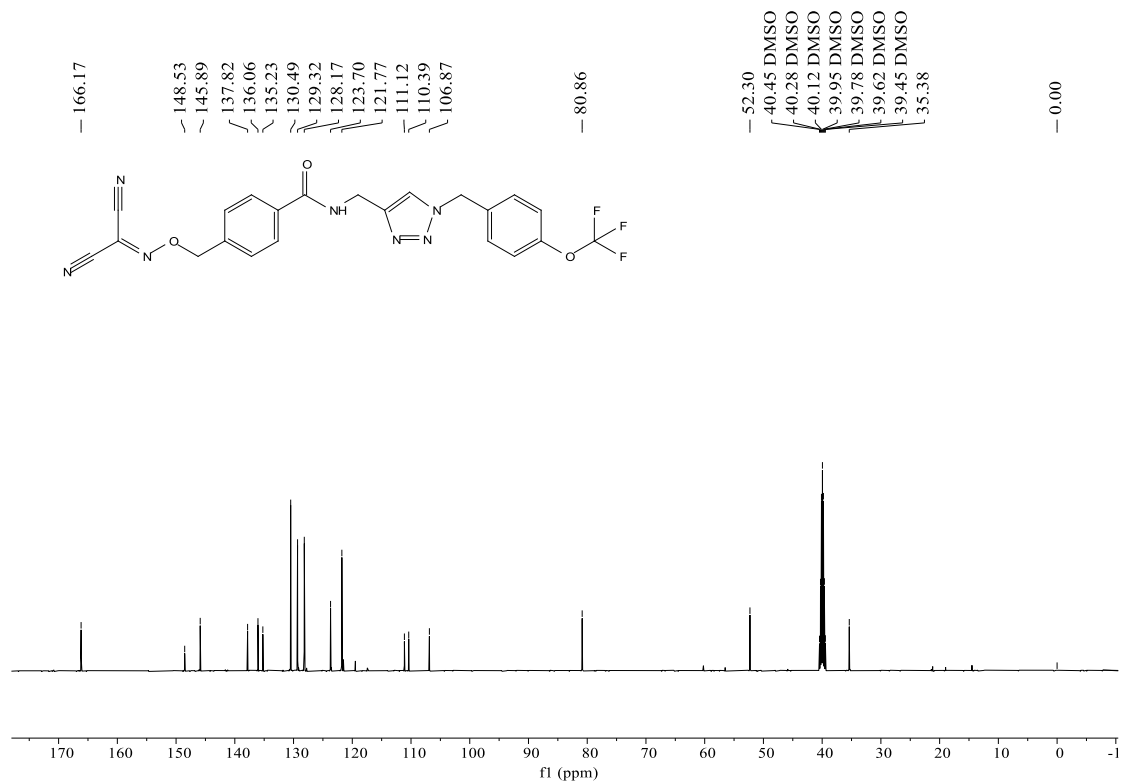

**<sup>13</sup>C NMR for compound E19**
